# Supplementary material for: Unprecedented selectivity for homologous lectin targets: differential targeting of the viral receptors L-SIGN and DC-SIGN
Source: Royal Society of Chemistry journal article supplement (doi:10.1039/d4sc02980a), 2024-01-01
Supplement: d4sc02980a1.pdf [file d4sc02980a1.pdf]

Supplementary information to

## Unprecedented selectivity for homologous lectin targets: differential targeting of the viral receptors L-SIGN and DC-SIGN

Clara Delaunay<sup>1†</sup>, Sara Pollastri<sup>2†</sup>, Michel Thépaut<sup>1</sup>, Gianluca Cavazzoli<sup>2</sup>, Laura Belvisi,<sup>2</sup> Clémentine Bouchikri<sup>1</sup>, Nuria Labiod<sup>3</sup>, Fatima Lasala<sup>3</sup>, Ana Gimeno<sup>4</sup>, Antonio Franconetti<sup>4</sup>, Jesús Jiménez-Barbero<sup>4,5,6</sup>, Ana Ardá<sup>4,5</sup>, Rafael Delgado<sup>3</sup>, Anna Bernardi<sup>2\*</sup>, Franck Fieschi<sup>1, 7\*</sup>

<sup>1</sup> Université Grenoble Alpes, CNRS, CEA, Institut de Biologie Structurale, Grenoble, France

<sup>2</sup> Università degli Studi di Milano, Dipartimento di Chimica, via Golgi 19, Milano, Italy

<sup>3</sup> Instituto de Investigación Hospital Universitario 12 de Octubre, Universidad Complutense School of Medicine, Madrid, Spain

<sup>4</sup> Chemical Glycobiology lab, Center for Cooperative Research in Biosciences (CIC bioGUNE), Basque Research and Technology Alliance (BRTA), 48160 Derio, Bizkaia, Spain.

<sup>5</sup> Ikerbasque, Basque Foundation for Science, Bilbao, Spain.

<sup>6</sup> Centro de Investigación Biomedica En Red de Enfermedades Respiratorias, 28029 Madrid, Spain

<sup>7</sup> Institut Universitaire de France (IUF), Paris

† These two authors have contributed equally to the work.

\* Corresponding authors: Franck Fieschi, [franck.fieschi@ibs.fr](mailto:franck.fieschi@ibs.fr) ; Anna Bernardi, [anna.bernardi@unimi.it](mailto:anna.bernardi@unimi.it)

## Table of contents

|                                                                                                |           |
|------------------------------------------------------------------------------------------------|-----------|
| <b>Materials and methods</b> .....                                                             | <b>3</b>  |
| General procedure for CuAAC reaction .....                                                     | 4         |
| General procedure for Zemplén deacetylation.....                                               | 4         |
| <b>Synthesis of 4</b> .....                                                                    | <b>5</b>  |
| <b>Synthesis of 2 (Man84)</b> .....                                                            | <b>5</b>  |
| <b>Synthesis of 8</b> .....                                                                    | <b>7</b>  |
| <b>Synthesis of 15</b> .....                                                                   | <b>8</b>  |
| <b>Synthesis of 9</b> .....                                                                    | <b>9</b>  |
| <b>Synthesis of 21</b> .....                                                                   | <b>11</b> |
| <b>Synthesis of Rod3</b> .....                                                                 | <b>13</b> |
| <b>Synthesis of PM68</b> .....                                                                 | <b>14</b> |
| <b>Synthesis of PM69</b> .....                                                                 | <b>16</b> |
| <b>Synthesis of PM70</b> .....                                                                 | <b>18</b> |
| <b>Synthesis of PM74</b> .....                                                                 | <b>20</b> |
| <b>Production of L-SIGN and DC-SIGN extracellular domain</b> .....                             | <b>22</b> |
| <b>Surface Plasmon Resonance (SPR) analysis</b> .....                                          | <b>23</b> |
| Sensorgrams of competition experiment .....                                                    | 24        |
| Sensorgrams of direct interaction experiments (duplicate).....                                 | 25        |
| <b>Isothermal titration calorimetry</b> .....                                                  | <b>27</b> |
| <b>NMR Interaction Experiments</b> .....                                                       | <b>28</b> |
| <b>Crystallogensis and crystal structure determination</b> .....                               | <b>29</b> |
| <b>Production of SARS-CoV-2 and EBOV-pseudotyped rVSV-luc and trans-infection assays</b> ..... | <b>31</b> |
| <b>References</b> .....                                                                        | <b>32</b> |
| <b>NMR spectra of ligands</b> .....                                                            | <b>34</b> |

## Materials and methods

---

All commercial reagents (Abcr, Carbosynth and Merck) were used without further purification, unless otherwise indicated. When anhydrous conditions were required, the reactions were performed under nitrogen atmosphere. Anhydrous solvents were purchased from Merck with water content  $\leq 0.0005\%$ . TEA,  $\text{CH}_2\text{Cl}_2$ ,  $\text{CH}_3\text{CN}$  and MeOH were dried over calcium hydride, THF was dried over sodium/benzophenone and freshly distilled. All solvents were of reagent grade or HPLC grade. When required, solvents were deoxygenated by bubbling Ar through the solvent for 30 min. Reactions were monitored by analytical thin-layer chromatography (TLC) performed on Silica Gel 60 F<sub>254</sub> plates (Merck) or Silica Gel 60 RP-18F<sub>254</sub>s plates (Merck) with UV detection (254 nm and 366 nm) and/or staining with molybdc reagent or ninhydrin.

- Molybdc reagent: 21 g  $(\text{NH}_4)_6\text{Mo}_7\text{O}_{24}\cdot 4\text{H}_2\text{O}$  (ammonium heptamolybdate tetrahydrate), 1 g  $\text{Ce}(\text{SO}_4)_2$  and 31 mL  $\text{H}_2\text{SO}_4$  in 470 mL  $\text{H}_2\text{O}$ ;
- Ninhydrin: 300 mg ninhydrin, 3 mL glacial AcOH in 100 mL abs. EtOH;

Flash chromatography was performed according to Still's procedure<sup>[1]</sup> using Silica gel Macherey-Naegel 60 (40-63  $\mu\text{m}$ , 230-400 mesh, Merck). Automated chromatography was performed on a Biotage Isolera Prime system with double UV detection (254 nm and 280 nm or 366 nm); Biotage SNAP KP-Sil and SFAR cartridges were employed. HPLC purifications were performed on Dionex Ultimate 3000 equipped with Dionex RS Variable Wavelength Detector (column: Atlantis Prep T3 OBDTM 5  $\mu\text{m}$  19 x 100 mm; flow 10 mL min<sup>-1</sup>, unless otherwise stated). A JASCO LC-4000 equipped with a C18 cartridge (Phenomenex, Luna 5u) was used for analytical HPLC. <sup>1</sup>H- and <sup>13</sup>C-NMR experiments were recorded on a Bruker Avance 400 MHz instrument at 298 K (unless otherwise stated). Chemical shifts ( $\delta$ ) are expressed in ppm and are referred to internal standards (TMS). The  $\delta$  (ppm) axis has been calibrated on the solvent residual signal for which every spectrum was recorded. The signal shapes (<sup>1</sup>H-NMR) are abbreviated as s (singlet), d (doublet), t (triplet), q (quartet), qui (quintet), sex (sextet), m (multiplet), dd (doublet doublets), td (triplet doublets). COSY and HSQC experiments were used to assist the <sup>1</sup>H and <sup>13</sup>C resonance assignments. Low resolution mass spectra were recorded on ThermoFisherLCQ apparatus (ESI ionization); high-resolution mass spectra (HRMS) were acquired on a Waters SYNAPT G2 Si ESI QToF instrument available at the MS facility of the Unitech COSPECT at the University of Milan; MALDI spectra were recorded on a Bruker Daltonics Microflex MALDI-TOF apparatus. Specific optical rotation values were measured using a Perkin-Elmer 241 polarimeter, at 589 nm in a 1 dm cell. Microwave-assisted organic synthesis was performed on a Biotage Initiator<sup>+</sup> synthesizer.

## General procedure for CuAAC reaction

**A)** A 0.04 M  $\text{CuSO}_4 \cdot 5\text{H}_2\text{O}$  and a 0.16 M Na-ascorbate solutions were prepared in deoxygenated water. A 0.4 M alkyne and a 0.4 M azide solutions were prepared in deoxygenated THF. To the alkyne solution (1 mol eq) were added: 0.1 mol eq of  $\text{CuSO}_4 \cdot 5\text{H}_2\text{O}$  solution, 0.4 mol eq of Na-ascorbate solution and 1 mol eq of the azide solution. The final concentration of azide being 0.1 M in a 1:1  $\text{H}_2\text{O}$ :THF mixture. The reaction was stirred at room temperature, under  $\text{N}_2$  and protected from light. Upon completion (TLC monitoring), the solvents were evaporated and the crude product purified via flash chromatography.

**B)** A 0.01 M  $\text{CuSO}_4 \cdot 5\text{H}_2\text{O}$  solution and a 0.04 M Na-ascorbate solution were prepared in deoxygenated water. A 0.03 M solution of alkyne, a 0.026 M solution of Tris[(1-benzyl-1H-1,2,3-triazol-4-yl)methyl]amine (**TBTA**) and a 0.2 M solution of azide were prepared in deoxygenated THF. To the alkyne solution were added: 0.2 mol eq of TBTA solution, 0.1 mol eq of  $\text{CuSO}_4 \cdot 5\text{H}_2\text{O}$  solution and 0.4 mol eq of Na-ascorbate solution. The mixture was stirred at room temperature for 10 min, then 2.2 mol eq of the azide solution were added. The final concentration of alkyne is therefore 0.016M in a 1:2  $\text{H}_2\text{O}$ :THF mixture. The reaction was stirred under microwave irradiation at 60 °C until completion (TLC, MALDI or NMR monitoring). Upon total consumption of the alkyne scaffold (4-13 h) the solvents were evaporated, and the crude product purified either via size-exclusion chromatography (SEC) using Sephadex LH-20 resin or directly via reverse phase automated flash chromatography.

## General procedure for Zemplén deacetylation

1 mol eq of protected compound was dissolved in dry MeOH and 0.1M, freshly prepared, NaOMe solution (0.3 mol eq NaOMe) was added to 0.18M final concentration of the substrate (0.05M final concentration of NaOMe, unless otherwise stated). The reaction was stirred at room temperature, under  $\text{N}_2$ . Upon completion (TLC analysis), the reaction was neutralized with Amberlite® IR120 hydrogen form ion-exchange resin, filtered and concentrated *in vacuo* to yield the pure product.

## Synthesis of 4

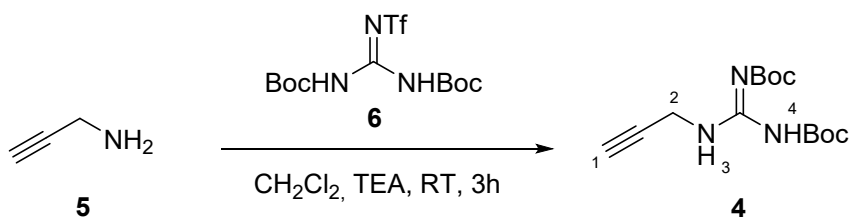

1,3-Di-Boc-2-(trifluoromethylsulfonyl)guanidine **6**<sup>[2,3]</sup> (abcr) (1.0 g, 2.5 mmol, 0.9 eq) and triethylamine (385  $\mu\text{L}$ , 2.78 mmol, 1.0 eq) were dissolved in dry  $\text{CH}_2\text{Cl}_2$  (12.6 mL); then propargylamine **5** (178  $\mu\text{L}$ , 2.78 mmol, 1.0 eq) was added. The reaction was stirred at room temperature, under  $\text{N}_2$ . Upon completion (3h, TLC monitoring Hex:AcOEt 7:3  $R_f$ (**4**): 0.64) the solvent was removed under reduced pressure. Crude product was purified via automated flash chromatography (Hex with AcOEt gradient from 0% to 30%) to obtain pure product **4** as a white solid (616 mg, 83%).

$^1\text{H-NMR}$  (400MHz,  $\text{CDCl}_3$ ):  $\delta$ (ppm)= 11.44 (s, 1H,  $\text{H}_4$ ), 8.46 (t, 1H,  $J_{3-2} = 5.0$  Hz,  $\text{H}_3$ ), 4.24 (dd, 2H,  $J_{2-3} = 5.0$  Hz,  $J_{2-1} = 2.6$  Hz,  $\text{H}_2$ ), 2.26 (t, 1H,  $J_{1-2} = 2.6$  Hz,  $\text{H}_1$ ), 1.45 (s, 18H,  $\text{H}_{\text{tBu}}$ ). MS (ESI):  $m/z$  calculated for  $[\text{C}_{14}\text{H}_{23}\text{N}_3\text{NaO}_4]^+$ : 320.16  $[\text{M} + \text{Na}]^+$ , found: 320.02;  $m/z$  calculated for  $[\text{C}_{14}\text{H}_{22}\text{N}_3\text{O}_4]^-$ : 296.16  $[\text{M} - \text{H}]^-$ , found: 295.99

## Synthesis of 2 (Man84)

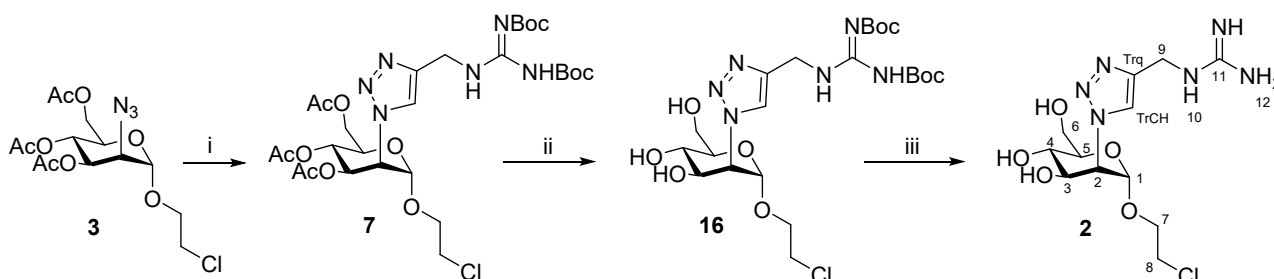

- i) **4**,  $\text{H}_2\text{O}:\text{THF}$  1:1, RT, ovn; ii) MeONa, MeOH, room temp. 2h;  
iii) 20% TFA in  $\text{CH}_2\text{Cl}_2$  (**2** TFA salt) or 1M aq HCl in  $\text{CH}_2\text{Cl}_2$ , 3 d (**2** chloride salt)

### i) CuAAC reaction

Synthesized from **3**<sup>[4]</sup> (59 mg, 0.15 mmol) and propargyl guanidine **4** according to general procedure A for CuAAC reaction. Purified via flash chromatography (Hex with AcOEt gradient from 0% to 70%) to obtain pure product **7** as a white foam (96.7 mg, 93%).

$R_f$ (**7**): 0.27 in Hex:AcOEt 6:4

$^1\text{H-NMR}$  (400MHz,  $\text{CDCl}_3$ ):  $\delta$ (ppm)= 11.44 (s, 1H,  $\text{H}_{12}$ ), 8.82 (t, 1H,  $J_{10-9} = 4.9$  Hz,  $\text{H}_{10}$ ), 7.98 (s, 1H,  $\text{H}_{\text{TrCH}}$ ), 5.51 (dd, 1H,  $J_{3-4} = 9.9$  Hz,  $J_{3-2} = 5.2$  Hz,  $\text{H}_3$ ), 5.42 (dd, 1H,  $J_{2-3} = 5.3$  Hz,  $J_{2-1} = 0.8$  Hz,  $\text{H}_2$ ), 5.26 (t, 1H,  $J_{4-3} =$

9.9 Hz, H<sub>4</sub>), 5.14 (s, 1H, H<sub>1</sub>), 4.82 (dd, 1H,  $J_{9a-9b} = 15.5$  Hz,  $J_{9a-10} = 4.9$  Hz, H<sub>9a</sub>), 4.68 (dd, 1H,  $J_{9b-9a} = 15.5$  Hz,  $J_{9b-10} = 4.9$  Hz, H<sub>9b</sub>), 4.33-4.18 (m, 3H, H<sub>6</sub>, H<sub>5</sub>), 4.02-3.94 (m, 1H, H<sub>7a</sub>), 3.91-3.83 (m, 1H, H<sub>7b</sub>), 3.72 (t, 2H,  $J_{8-7} = 5.7$  Hz, H<sub>8</sub>), 2.16 (s, 3H, OAc), 2.05 (s, 3H, OAc), 1.95 (s, 3H, OAc), 1.50 (s, 9H, H<sub>tBu</sub>), 1.47 (s, 9H, H<sub>tBu</sub>). <sup>13</sup>C-NMR (400MHz, CDCl<sub>3</sub>): δ(ppm) extrapolated from HSQC = 121.8 (C<sub>TrCH</sub>), 97.7 (C<sub>1</sub>), 68.9 (C<sub>5</sub>), 68.7 (C<sub>7</sub>), 68.5 (C<sub>3</sub>), 64.7 (C<sub>4</sub>), 61.9 (C<sub>6</sub>), 60.0 (C<sub>2</sub>), 42.3 (C<sub>8</sub>), 36.2 (C<sub>9</sub>), 28.1 (tBu), 20.7 (CH<sub>3</sub>CO), 20.5 (CH<sub>3</sub>CO), 20.4 (CH<sub>3</sub>CO). MS (ESI): m/z calculated for [C<sub>28</sub>H<sub>44</sub>ClN<sub>6</sub>O<sub>12</sub>]<sup>+</sup> : 691.27 [M + H]<sup>+</sup>, found: 691.58; m/z calculated for [C<sub>28</sub>H<sub>43</sub>ClN<sub>6</sub>NaO<sub>12</sub>]<sup>+</sup> : 713.25 [M + Na]<sup>+</sup>, found: 713.54; m/z calculated for [C<sub>28</sub>H<sub>42</sub>ClN<sub>6</sub>O<sub>12</sub>]<sup>-</sup> : 689.25 [M - H]<sup>-</sup>, found: 689.65. HRMS (ESI): m/z calculated for [C<sub>28</sub>H<sub>43</sub>ClN<sub>6</sub>NaO<sub>12</sub>]<sup>+</sup> : 713.2525 [M + Na]<sup>+</sup>, found: 713.2521.

### *ii) Zemplén deacetylation*

Performed on intermediate **7** (50 mg, 0.07 mmol) according to general procedure for deacetylation (0.02M final concentration of NaOMe).

R<sub>f</sub>(**16**): 0.57 in 9:1 CH<sub>2</sub>Cl<sub>2</sub>:MeOH

<sup>1</sup>H-NMR (400MHz, CD<sub>3</sub>OD): δ(ppm)= 8.18 (s, 1H, H<sub>TrCH</sub>), 5.14 (s, 1H, H<sub>1</sub>), 5.09 (dd, 1H,  $J_{2-3} = 5.2$  Hz,  $J_{2-1} = 0.9$  Hz, H<sub>2</sub>), 4.68 (s, 2H, H<sub>9</sub>), 4.19 (dd, 1H,  $J_{3-4} = 9.4$  Hz,  $J_{3-2} = 5.2$  Hz, H<sub>3</sub>), 4.04-3.97 (m, 1H, H<sub>7a</sub>), 3.92-3.78 (m, 4H, H<sub>6</sub>, H<sub>7b</sub>, H<sub>5</sub>), 3.77-3.68 (m, 3H, H<sub>8</sub>, H<sub>4</sub>), 1.52 (s, 9H, H<sub>tBu</sub>), 1.48 (s, 9H, H<sub>tBu</sub>). <sup>13</sup>C-NMR (400MHz, CD<sub>3</sub>OD): δ(ppm) extrapolated from HSQC = 123.4 (C<sub>TrCH</sub>), 97.9 (C<sub>1</sub>), 73.8 (C<sub>5</sub>), 68.9 (C<sub>3</sub>), 67.7 (C<sub>7</sub>), 66.3 (C<sub>4</sub>), 60.2 (C<sub>2</sub>), 60.7 (C<sub>6</sub>), 42.4 (C<sub>8</sub>), 35.5 (C<sub>9</sub>), 27.1 (H<sub>tBu</sub>), 26.9 (H<sub>tBu</sub>). MS (HRMS): m/z calculated for [C<sub>22</sub>H<sub>38</sub>ClN<sub>6</sub>O<sub>9</sub>]<sup>+</sup> : 565.24 [M + H]<sup>+</sup>, found: 565.20; m/z calculated for [C<sub>22</sub>H<sub>37</sub>ClN<sub>6</sub>NaO<sub>9</sub>]<sup>+</sup> : 587.22 [M + Na]<sup>+</sup>, found: 587.21; m/z calculated for [C<sub>22</sub>H<sub>37</sub>ClN<sub>6</sub>O<sub>9</sub>]<sup>-</sup> : 563.22 [M - H]<sup>-</sup>, found: 563.17.

### *iii) Boc-deprotection (TFA method)*

Compound **16** (47.4 mg, 0.083 mmol, 1 eq.) was dissolved in a 4:1 mixture of dry CH<sub>2</sub>Cl<sub>2</sub> and TFA (1.66 mL). The reaction was stirred at room temperature, under N<sub>2</sub> for 5h. Upon completion (TLC monitoring, CH<sub>2</sub>Cl<sub>2</sub>:MeOH 8:2, R<sub>f</sub>(**2**): 0.21, staining Molybdic reagent and/or Ninhydrin) the mixture was concentrated *in vacuo* and co-evaporated with toluene three-times to obtain the pure product **2·TFAH** as a white foam (39 mg, quantitative).

### *iii) Boc-deprotection (HCl method)*

Compound **16** (36.3 mg, 0.064 mmol, 1 eq.) was dissolved in CH<sub>2</sub>Cl<sub>2</sub> (1.4 mL), then 190 μL of a 1M aqueous solution of HCl (3.0 eq) were added. The reaction was stirred at room temperature for 3 days. Upon completion (TLC monitoring, CH<sub>2</sub>Cl<sub>2</sub>:MeOH 8:2, R<sub>f</sub>(**2**): 0.21, staining Molybdic reagent and/or Ninhydrin), the mixture was concentrated *in vacuo* and co-evaporated with toluene three-times to obtain pure product **2·HCl** as a white foam (22.7 mg, 88%).

$^1\text{H-NMR}$  (400MHz,  $\text{CD}_3\text{OD}$ ):  $\delta(\text{ppm}) = 8.24$  (s, 1H,  $\text{H}_{\text{TrCH}}$ ), 5.16-5.10 (m, 2H,  $\text{H}_1$ ,  $\text{H}_2$ ), 4.51 (s, 2H,  $\text{H}_9$ ), 4.24 (dd, 1H,  $J_{3-4} = 9.6$  Hz,  $J_{3-2} = 5.3$  Hz,  $\text{H}_3$ ), 4.06-3.99 (m, 1H,  $\text{H}_{7a}$ ), 3.91 (d, 2H,  $J_{6-5} = 3.1$  Hz,  $\text{H}_6$ ), 3.87-3.80 (m, 2H,  $\text{H}_{7b}$ ,  $\text{H}_5$ ), 3.79-3.71 (m, 3H,  $\text{H}_8$ ,  $\text{H}_4$ ).  $^{13}\text{C-NMR}$  (400 MHz,  $\text{CD}_3\text{OD}$ ):  $\delta(\text{ppm}) = 158.9$  ( $\text{C}_{11}$ ), 158.8 ( $\text{C}_{\text{Trq}}$ ), 124.9 ( $\text{C}_{\text{TrCH}}$ ), 99.4 ( $\text{C}_1$ ), 75.1 ( $\text{C}_5$ ), 70.1 ( $\text{C}_3$ ), 69.3 ( $\text{C}_7$ ), 67.6 ( $\text{C}_4$ ), 65.4 ( $\text{C}_2$ ), 61.8 ( $\text{C}_6$ ), 43.8 ( $\text{C}_8$ ), 37.6 ( $\text{C}_9$ ). MS (HRMS):  $m/z$  calculated for  $[\text{C}_{12}\text{H}_{22}\text{ClN}_6\text{O}_5]^+$ : 365.1340  $[\text{M} + \text{H}]^+$ , found: 365.1337;  $m/z$  calculated for  $[\text{C}_{12}\text{H}_{21}\text{ClN}_6\text{NaO}_5]^+$ : 387.1159  $[\text{M} + \text{Na}]^+$ , found: 387.1153.

$[\alpha]_D^{27} = +10$  ( $c = 0.5$ ,  $\text{MeOH}$ )

## Synthesis of **8**

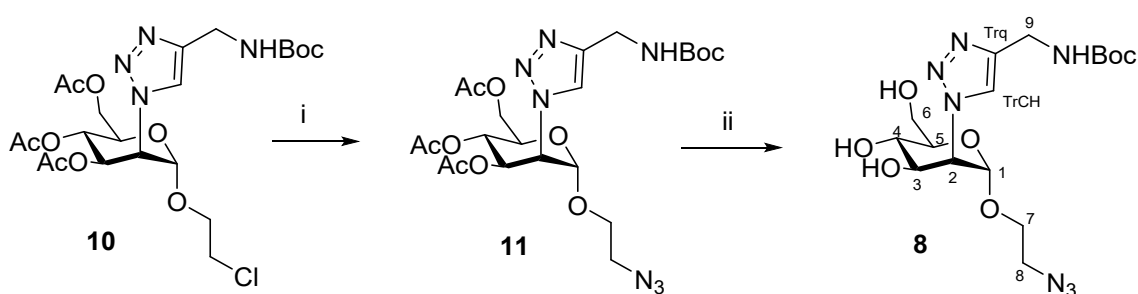

i)  $\text{NaN}_3$ , DMF, 55 °C, 3d; ii) NaOMe, MeOH, RT, 1h

### i) Chlorine-azide exchange

Compound **10**<sup>[4]</sup> (990 mg, 1.8 mmol, 1 eq) was dissolved in dry DMF (9 mL), then  $\text{NaN}_3$  (586 mg, 9 mmol, 5.0 eq) was added, and the reaction stirred at 55 °C for 3 days. Upon completion ( $^1\text{H-NMR}$  monitoring), the mixture was concentrated *in vacuo* and the crude product purified via automated flash chromatography (Hex with AcOEt gradient from 35% to 70%;  $R_f(\mathbf{11})$ : 0.25 in Hex:AcOEt 1:1) to obtain pure product **11** as a white foam (919.4 mg, 92%).

$^1\text{H-NMR}$  (400 MHz,  $\text{CD}_3\text{OD}$ ):  $\delta(\text{ppm}) = 8.10$  (s, 1H,  $\text{H}_{\text{TrCH}}$ ), 5.49 (dd, 1H,  $J_{3-4} = 10.2$  Hz,  $J_{3-2} = 5.1$  Hz,  $\text{H}_3$ ), 5.40 (d, 1H,  $J_{2-3} = 5.1$  Hz,  $\text{H}_2$ ), 5.32 (t, 1H,  $J_{4-3} = 10.2$  Hz,  $\text{H}_4$ ), 5.27 (s, 1H,  $\text{H}_1$ ), 4.41-4.32 (m, 3H,  $\text{H}_{6a}$ ,  $\text{H}_9$ ), 4.30-4.19 (m, 2H,  $\text{H}_{6b}$ ,  $\text{H}_5$ ), 4.01-3.92 (m, 1H,  $\text{H}_{7a}$ ), 3.82-3.75 (m, 1H,  $\text{H}_{7b}$ ), 3.62-3.45 (m, 2H,  $\text{H}_8$ ), 2.16 (s, 3H, OAc), 2.05 (s, 3H, OAc), 1.89 (s, 3H, OAc), 1.45 (s, 9H,  $\text{H}_{\text{tBu}}$ ).  $^{13}\text{C-NMR}$  (400MHz,  $\text{CD}_3\text{OD}$ ):  $\delta(\text{ppm})$  extrapolated from HSQC = 122.1 ( $\text{C}_{\text{TrCH}}$ ), 97.5 ( $\text{C}_1$ ), 68.9 ( $\text{C}_5$ ), 68.7 ( $\text{C}_3$ ), 67.1 ( $\text{C}_7$ ), 64.8 ( $\text{C}_4$ ), 61.6 ( $\text{C}_6$ ), 60.2 ( $\text{C}_2$ ), 50.1 ( $\text{C}_8$ ), 35.6 ( $\text{C}_9$ ), 27.2 (tBu), 19.5 ( $\text{CH}_3\text{CO}$ ), 19.2 ( $\text{CH}_3\text{CO}$ ), 18.9 ( $\text{CH}_3\text{CO}$ ). MS (ESI):  $m/z$  calculated for  $[\text{C}_{22}\text{H}_{33}\text{N}_7\text{NaO}_{10}]^+$ : 578.22  $[\text{M} + \text{Na}]^+$ , found: 578.38.

### ii) Zemplén deacetylation

Performed on intermediate **11** (50 mg, 0.09 mmol) according to general procedure for deacetylation (37.8 mg, 98%).

R<sub>f</sub>(**8**): 0.51 in CHCl<sub>3</sub>:MeOH 9:1

<sup>1</sup>H-NMR (400 MHz, CD<sub>3</sub>OD): δ(ppm)= 8.06 (s, 1H, H<sub>TrCH</sub>), 5.12 (s, 1H, H<sub>1</sub>), 5.07 (d, 1H, J<sub>2-3</sub>= 4.7 Hz, H<sub>2</sub>), 4.31 (s, 2H, H<sub>9</sub>), 4.24-4.17 (m, 1H, H<sub>3</sub>), 4.01-3.82 (m, 3H, H<sub>7a</sub>, H<sub>6</sub>), 3.81-3.66 (m, 3H, H<sub>7b</sub>, H<sub>4</sub>, H<sub>5</sub>), 3.48 (t, 2H, J<sub>8-7</sub> = 4.6 Hz, H<sub>8</sub>), 1.45 (s, 9H, H<sub>tBu</sub>). <sup>13</sup>C-NMR (400MHz, CD<sub>3</sub>OD): δ(ppm) extrapolated from HSQC = 122.7 (C<sub>TrCH</sub>), 97.9 (C<sub>1</sub>), 73.9 (C<sub>5</sub>), 68.9 (C<sub>3</sub>), 66.5 (C<sub>7</sub>), 66.3 (C<sub>4</sub>), 64.2 (C<sub>2</sub>), 60.7 (C<sub>6</sub>), 50.0 (C<sub>8</sub>), 35.4 (C<sub>9</sub>), 27.2 (tBu). MS (ESI): m/z calculated for [C<sub>16</sub>H<sub>27</sub>N<sub>7</sub>NaO<sub>7</sub>]<sup>+</sup> : 452.19 [M + Na]<sup>+</sup>, found: 452.19; m/z calculated for [C<sub>32</sub>H<sub>54</sub>N<sub>14</sub>NaO<sub>14</sub>]<sup>+</sup> : 881.38 [2M + Na]<sup>+</sup>, found: 881.01; m/z calculated for [C<sub>16</sub>H<sub>26</sub>N<sub>7</sub>O<sub>7</sub>]<sup>-</sup> : 428.18 [M - H]<sup>-</sup> found 428.18. HRMS (ESI): m/z calculated for [C<sub>16</sub>H<sub>27</sub>N<sub>7</sub>NaO<sub>7</sub>]<sup>+</sup> : 452.1870 [M + Na]<sup>+</sup>, found: 452.1873

## Synthesis of **15**

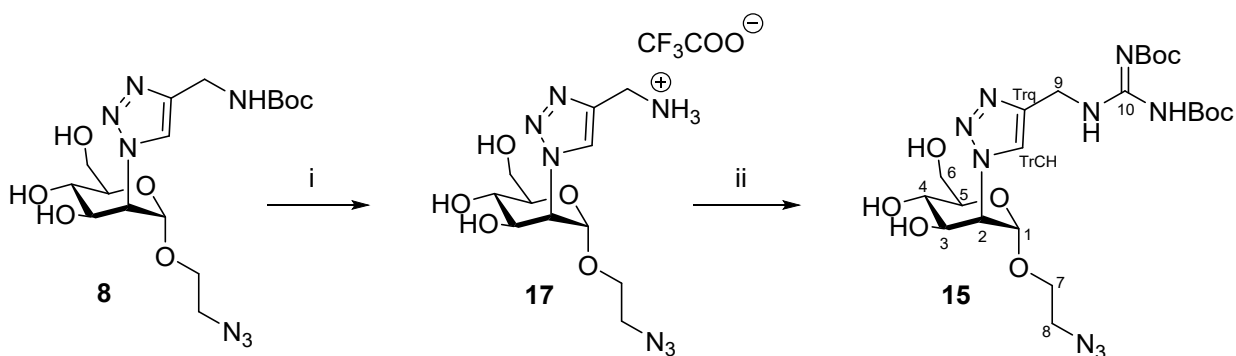

i) CH<sub>2</sub>Cl<sub>2</sub>:TFA 9:1, RT, 1h;

ii) 1,3-Di-Boc-2-(trifluoromethylsulfonyl)guanidine **6**, TEA, 1,4-dioxane:H<sub>2</sub>O 5:1, RT, ovn.

### i) Boc-deprotection

Compound **8** (37.5 mg, 0.087 mmol, 1 eq.) was dissolved in a 9:1 mixture of dry CH<sub>2</sub>Cl<sub>2</sub> and TFA (1.77 mL). The reaction was stirred at room temperature, under N<sub>2</sub> for 1h. Upon completion (1h, TLC monitoring, CHCl<sub>3</sub>:MeOH 8:2, R<sub>f</sub>(**17**): 0.21) the mixture was concentrated *in vacuo* and co-evaporated with toluene three-times to obtain the pure TFA salt **17** as a yellowish foam (38.5 mg, quantitative).

<sup>1</sup>H-NMR (400 MHz, CD<sub>3</sub>OD): δ(ppm)= 8.30 (s, 1H, H<sub>TrCH</sub>), 5.16-5.11 (m, 2H, H<sub>1</sub>, H<sub>2</sub>), 4.28-4.21 (m, 3H, H<sub>9</sub>, H<sub>3</sub>), 4.01-3.93 (m, 1H, H<sub>7a</sub>), 3.90 (d, 2H, J<sub>6-5</sub> = 3.4 Hz, H<sub>6</sub>), 3.82-3.76 (m, 1H, H<sub>5</sub>), 3.75-3.66 (m, 2H, H<sub>4</sub>, H<sub>6b</sub>), 3.53-3.46 (t, 2H, J<sub>8-7</sub> = 4.7 Hz, H<sub>8</sub>). <sup>13</sup>C-NMR (400MHz, CD<sub>3</sub>OD): δ(ppm) extrapolated from HSQC = 124.3 (C<sub>TrCH</sub>), 98.1 (C<sub>1</sub>), 73.8 (C<sub>5</sub>), 68.9 (C<sub>3</sub>), 66.7 (C<sub>7</sub>), 66.5 (C<sub>4</sub>), 64.3 (C<sub>2</sub>), 60.7 (C<sub>6</sub>), 50.2 (C<sub>8</sub>), 34.1 (C<sub>9</sub>). MS (ESI): m/z calculated for [C<sub>11</sub>H<sub>29</sub>N<sub>7</sub>O<sub>5</sub>]<sup>+</sup> : 330.15 [M + Na]<sup>+</sup>, found: 330.18

### ii) Guanidinylation reaction<sup>[5]</sup>

The TFA salt **17** (170 mg, 0.38 mmol, 1 eq.) was dissolved in H<sub>2</sub>O (316 μL) and diluted with 1,4-dioxane (1.6 mL), then 1,3-Di-Boc-2-(trifluoromethylsulfonyl)guanidine **6** (180.1 mg, 0.46 mmol, 1.2 eq) was



added. After five minutes, triethylamine (158  $\mu$ L, 1.14 mmol, 3 eq) was slowly added and the reaction stirred at room temperature overnight. Upon completion (TLC monitoring,  $\text{CH}_2\text{Cl}_2$ :MeOH 9:1,  $R_f$ (**15**): 0.49) the mixture was diluted with AcOEt and washed with brine three-times. The organic phase was dried over  $\text{Na}_2\text{SO}_4$ , filtered and concentrated *in vacuo*. The crude was purified via automated flash chromatography ( $\text{CH}_2\text{Cl}_2$  with a MeOH gradient from 0% to 20%) to obtain the pure product **15** as a white foam (177.3 mg, 82%).

$^1\text{H-NMR}$  (400 MHz,  $\text{CD}_3\text{OD}$ ):  $\delta$ (ppm)= 8.18 (s, 1H,  $\text{H}_{\text{TrCH}}$ ), 5.14 (s, 1H,  $\text{H}_1$ ), 5.09 (d, 1H,  $J_{2-3} = 5.2$  Hz,  $\text{H}_2$ ), 4.65 (s, 2H,  $\text{H}_9$ ), 4.21 (dd, 1H,  $J_{3-4} = 9.1$  Hz,  $J_{3-2} = 5.2$  Hz,  $\text{H}_3$ ), 3.99-3.91 (m, 1H,  $\text{H}_{7a}$ ), 3.90-3.83 (m, 2H,  $\text{H}_6$ ), 3.81-3.67 (m, 3H,  $\text{H}_4$ ,  $\text{H}_5$ ,  $\text{H}_{7b}$ ), 3.48 (t, 2H,  $J_{8-7} = 5.1$  Hz,  $\text{H}_8$ ), 1.51 (s, 9H,  $\text{H}_{\text{tBu}}$ ), 1.48 (s, 9H,  $\text{H}_{\text{tBu}}$ ).  $^{13}\text{C-NMR}$  (400MHz,  $\text{CD}_3\text{OD}$ ):  $\delta$ (ppm) = 164.4 ( $\text{COOtBu}$ ), 157.3 ( $\text{COOtBu}$ ), 153.9 ( $\text{C}_{10}$ ), 144.8 ( $\text{C}_{\text{Trq}}$ ), 124.8 ( $\text{C}_{\text{TrCH}}$ ), 99.3 ( $\text{C}_1$ ), 84.5 ( $\text{C}_{\text{quatBu}}$ ), 80.5 ( $\text{C}_{\text{quatBu}}$ ), 75.2 ( $\text{C}_5$ ), 70.2 ( $\text{C}_3$ ), 67.9 ( $\text{C}_7$ ), 67.8 ( $\text{C}_4$ ), 65.3 ( $\text{C}_2$ ), 62.2 ( $\text{C}_6$ ), 51.7 ( $\text{C}_8$ ), 36.9 ( $\text{C}_9$ ), 28.6 ( $\text{tBu}$ ), 28.2 ( $\text{tBu}$ ). MS (ESI):  $m/z$  calculated for  $[\text{C}_{22}\text{H}_{37}\text{N}_9\text{NaO}_9]^+$  : 594.26  $[\text{M} + \text{Na}]^+$ , found: 594.40. HRMS (ESI):  $m/z$  calculated for  $[\text{C}_{22}\text{H}_{37}\text{N}_9\text{NaO}_9]^+$  : 594.2612  $[\text{M} + \text{Na}]^+$ , found: 594.2618;  $m/z$  calculated for  $[\text{C}_{22}\text{H}_{38}\text{N}_9\text{O}_9]^+$  : 572.2792  $[\text{M} + \text{Na}]^+$ , found: 572.2793.

## Synthesis of **9**

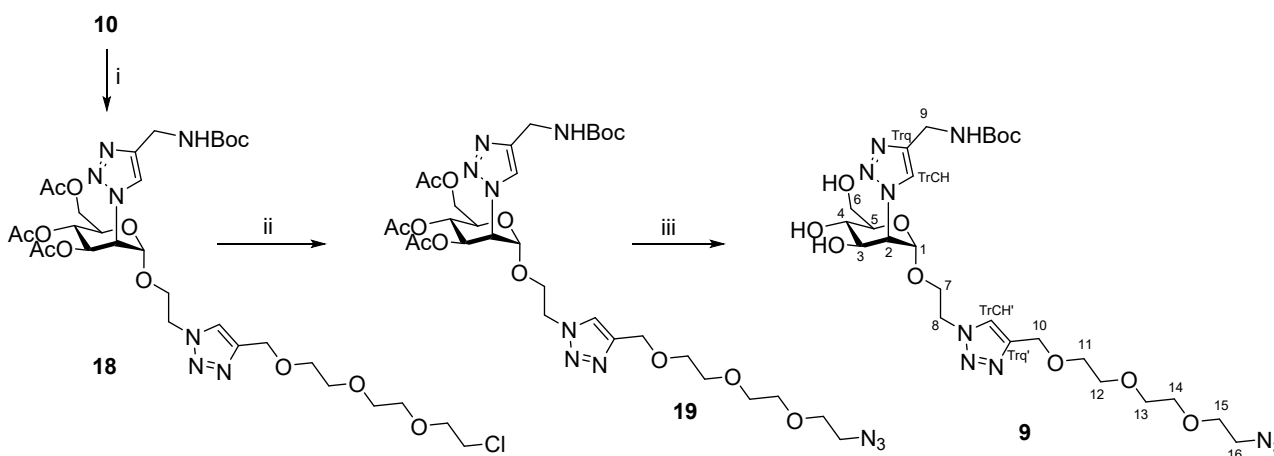

- i)  $\text{CH}_2\text{C}\equiv\text{C}(\text{OCH}_2)_3\text{Cl}$ ,  $\text{CuSO}_4 \cdot 5\text{H}_2\text{O}$ , Na-ascorbate, THF/ $\text{H}_2\text{O}$ ; ii)  $\text{NaN}_3$ , DMF, 55  $^\circ\text{C}$ , 5 days;  
iii) NaOMe, MeOH, RT, 1h.

### i) CuAAC reaction

Synthesized from **10** (615 mg, 1.2 mmol) and **12**<sup>[6]</sup> according to general procedure A for CuAAC reaction. Purified via flash chromatography ( $\text{CH}_2\text{Cl}_2$  with Acetone gradient from 5% to 100%) to obtain pure product **18** as a white foam (689.4 mg, 82%).

$R_f$ (**18**): 0.66 in  $\text{CH}_2\text{Cl}_2$ :MeOH 9:1

<sup>1</sup>H-NMR (400MHz, CD<sub>3</sub>OD): δ(ppm)= 8.09 (s, 1H, H<sub>TrCH'</sub>), 8.04 (s, 1H, H<sub>TrCH</sub>), 5.39-5.29 (m, 2H, H<sub>2</sub>, H<sub>3</sub>), 5.28-5.17 (m, 2H, H<sub>1</sub>, H<sub>4</sub>), 4.79-4.70 (m, 2H, H<sub>8</sub>), 4.68 (s, 2H, H<sub>10</sub>), 4.33 (s, 2H, H<sub>9</sub>), 4.29-4.16 (m, 2H, H<sub>6a</sub>, H<sub>7a</sub>), 4.14-3.99 (m, 2H, H<sub>6b</sub>, H<sub>7b</sub>), 3.76-3.71 (m, 2H, H<sub>15</sub>), 3.70-3.62 (m, 11H, H<sub>5</sub>, H<sub>11</sub>-H<sub>14</sub>, H<sub>16</sub>), 2.15 (s, 3H, OAc), 2.03 (s, 3H, OAc), 1.88 (s, 3H, OAc), 1.43 (s, 9H, H<sub>tBu</sub>). <sup>13</sup>C-NMR (400MHz, CD<sub>3</sub>OD): δ(ppm) extrapolated from HSQC = 124.4 (C<sub>TrCH'</sub>), 122.1 (C<sub>TrCH</sub>), 97.2 (C<sub>1</sub>), 70.9 (C<sub>15</sub>), 69.8 (C<sub>11</sub>-C<sub>14</sub>, C<sub>16</sub>), 68.7 (C<sub>3</sub>), 68.6 (C<sub>5</sub>), 65.9 (C<sub>7</sub>), 64.4 (C<sub>4</sub>), 63.6 (C<sub>10</sub>), 61.3 (C<sub>6</sub>), 60.1 (C<sub>2</sub>), 49.5 (C<sub>8</sub>), 42.4 (C<sub>16</sub>), 35.4 (C<sub>9</sub>), 27.3 (tBu), 19.5 (CH<sub>3</sub>CO), 19.2 (CH<sub>3</sub>CO), 18.9 (CH<sub>3</sub>CO). MS (ESI): m/z calculated for [C<sub>31</sub>H<sub>48</sub>ClN<sub>7</sub>NaO<sub>13</sub>]<sup>+</sup> : 784.29 [M + Na]<sup>+</sup>, found: 784.81. HRMS (ESI): m/z calculated for [C<sub>31</sub>H<sub>48</sub>ClN<sub>7</sub>NaO<sub>13</sub>]<sup>+</sup> : 784.2896 [M + Na]<sup>+</sup>, found: 784.2891.

### *ii) Chlorine-azide exchange*

Compound **18** (500 mg, 0.65 mmol, 1 eq) was dissolved in dry DMF (3.25 mL), then NaN<sub>3</sub> (213.2 mg, 3.28 mmol, 5 eq) was added, and the reaction stirred at 55 °C for 5 days. Upon completion (<sup>1</sup>H-NMR monitoring), the mixture was concentrated *in vacuo* and the crude product purified via automated flash chromatography (CH<sub>2</sub>Cl<sub>2</sub> with MeOH gradient from 3% to 10%) to obtain pure product **19** as a white foam (430 mg, 86%).

R<sub>f</sub>(**19**): 0.65 in CH<sub>2</sub>Cl<sub>2</sub>:MeOH 9:1

<sup>1</sup>H-NMR (400MHz, CD<sub>3</sub>OD): δ(ppm)= 8.09 (s, 1H, H<sub>TrCH'</sub>), 8.04 (s, 1H, H<sub>TrCH</sub>), 5.39-5.29 (m, 2H, H<sub>2</sub>, H<sub>3</sub>), 5.28-5.17 (m, 2H, H<sub>1</sub>, H<sub>4</sub>), 4.79-4.70 (m, 2H, H<sub>8</sub>), 4.68 (s, 2H, H<sub>10</sub>), 4.33 (s, 2H, H<sub>9</sub>), 4.29-4.16 (m, 2H, H<sub>6a</sub>, H<sub>7a</sub>), 4.14-3.99 (m, 2H, H<sub>6b</sub>, H<sub>7b</sub>), 3.72 (m, 11H, H<sub>5</sub>, H<sub>11</sub>-H<sub>15</sub>), 3.40-3.61 (m, 2H, H<sub>16</sub>), 2.15 (s, 3H, OAc), 2.03 (s, 3H, OAc), 1.88 (s, 3H, OAc), 1.43 (s, 9H, H<sub>tBu</sub>). <sup>13</sup>C-NMR (400MHz, CD<sub>3</sub>OD): δ(ppm) extrapolated from HSQC = 124.4 (C<sub>TrCH'</sub>), 122.1 (C<sub>TrCH</sub>), 97.2 (C<sub>1</sub>), 69.8 (C<sub>11</sub>-C<sub>15</sub>), 68.7 (C<sub>3</sub>), 68.6 (C<sub>5</sub>), 65.9 (C<sub>7</sub>), 64.4 (C<sub>4</sub>), 63.6 (C<sub>10</sub>), 61.3 (C<sub>6</sub>), 60.1 (C<sub>2</sub>), 49.5 (C<sub>8</sub>), 42.4 (C<sub>16</sub>), 35.4 (C<sub>9</sub>), 27.3 (tBu), 19.5 (CH<sub>3</sub>CO), 19.2 (CH<sub>3</sub>CO), 18.9 (CH<sub>3</sub>CO). MS (ESI): m/z calculated for [C<sub>31</sub>H<sub>48</sub>N<sub>10</sub>NaO<sub>13</sub>]<sup>+</sup> : 791.33 [M + Na]<sup>+</sup>, found: 791.75

### *ii) Zemplén deacetylation*

Performed on intermediate **19** (390 mg, 0.51 mmol) according to general procedure for deacetylation (311.3 mg, 95%).

R<sub>f</sub>(**9**): 0.50 in CH<sub>2</sub>Cl<sub>2</sub>:MeOH 9:1

<sup>1</sup>H-NMR (400MHz, CD<sub>3</sub>OD): δ(ppm)= 8.04 (s, 1H, H<sub>TrCH'</sub>), 8.01 (s, 1H, H<sub>TrCH</sub>), 5.04 (s, 1H, H<sub>1</sub>), 4.99 (d, 1H, J<sub>2-3</sub> = 5.1 Hz, H<sub>2</sub>), 4.71-4.63 (m, 4H, H<sub>8</sub>, H<sub>10</sub>), 4.29 (s, 2H, H<sub>9</sub>), 4.21-4.13 (m, 1H, H<sub>7a</sub>), 4.05 (dd, 1H, J<sub>3-4</sub> = 9.4 Hz, J<sub>3-2</sub> = 5.1 Hz, H<sub>3</sub>), 3.98-3.91 (m, 1H, H<sub>7b</sub>), 3.85-3.75 (m, 2H, H<sub>6</sub>), 3.70-3.62 (m, 11H, H<sub>4</sub>, H<sub>11</sub>-H<sub>15</sub>), 3.40-3.33 (m, 3H, H<sub>5</sub>, H<sub>16</sub>), 1.44 (s, 9H, H<sub>tBu</sub>). <sup>13</sup>C-NMR (400MHz, CD<sub>3</sub>OD): δ(ppm) extrapolated from HSQC = 124.1 (C<sub>TrCH'</sub>), 122.6 (C<sub>TrCH</sub>), 97.8 (C<sub>1</sub>), 73.8 (C<sub>5</sub>), 69.8 (C<sub>11</sub>-C<sub>15</sub>), 68.9 (C<sub>3</sub>), 66.3 (C<sub>4</sub>), 65.4 (C<sub>7</sub>), 63.5 (C<sub>10</sub>),

63.3 (C<sub>2</sub>), 60.5 (C<sub>6</sub>), 50.5 (C<sub>16</sub>), 49.6 (C<sub>8</sub>), 35.3 (C<sub>9</sub>), 27.7 (tBu). MS (ESI): m/z calculated for [C<sub>25</sub>H<sub>42</sub>N<sub>10</sub>NaO<sub>10</sub>]<sup>+</sup> : 665.30 [M + Na]<sup>+</sup>, found: 665.58

## Synthesis of **21**

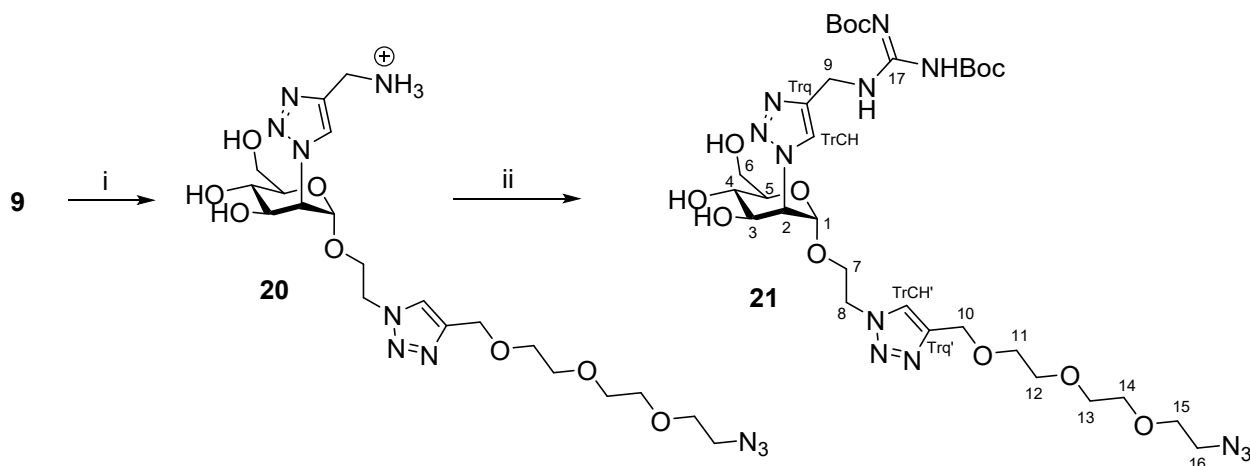

i) CH<sub>2</sub>Cl<sub>2</sub>:TFA 9:1, RT, 1h;

ii) 1,3-Di-Boc-2-(trifluoromethylsulfonyl)guanidine **6**, TEA, 1,4-dioxane:H<sub>2</sub>O 5:1, RT, o/n

### i) Boc-deprotection

Compound **9** (60 mg, 0.09 mmol, 1 eq.) was dissolved in a 9:1 mixture of dry CH<sub>2</sub>Cl<sub>2</sub> and TFA (1.88 mL). The reaction was stirred at room temperature, under N<sub>2</sub> for 2h. Upon completion (TLC monitoring, CHCl<sub>3</sub>:MeOH 8:2, R<sub>f</sub>(**20**): 0.1) the mixture was concentrated *in vacuo* and co-evaporated with toluene three-times to obtain the pure TFA salt **20** as a white foam (54.9 mg, 93%).

<sup>1</sup>H-NMR (400MHz, CD<sub>3</sub>OD): δ(ppm)= 8.23 (s, 1H, H<sub>TrCH</sub>), 8.09 (brs, 1H, H<sub>TrCH'</sub>), 5.06-5.01 (m, 2H, H<sub>1</sub>, H<sub>2</sub>), 4.73-4.62 (m, 4H, H<sub>8</sub>, H<sub>10</sub>), 4.27-4.14 (m, 3H, H<sub>9</sub>, H<sub>7a</sub>), 4.08 (dd, 1H, J<sub>3-4</sub> = 9.3 Hz, J<sub>3-2</sub> = 5.0 Hz, H<sub>3</sub>), 4.01-3.92 (m, 1H, H<sub>7b</sub>), 3.81 (d, 2H, J<sub>6-5</sub> = 3.0 Hz, H<sub>6</sub>), 3.72-3.63 (m, 11H, H<sub>4</sub>, H<sub>11</sub>-H<sub>15</sub>), 3.40-3.34 (m, 3H, H<sub>5</sub>, H<sub>16</sub>).  
<sup>13</sup>C-NMR (400MHz, CD<sub>3</sub>OD): δ(ppm) = 125.9 (C<sub>TrCH</sub>), 99.1 (C<sub>1</sub>), 75.2 (C<sub>5</sub>), 71.5 (C<sub>12</sub>, C<sub>13</sub>), 71.4 (C<sub>14</sub>), 71.0 (C<sub>15</sub>), 70.8 (C<sub>11</sub>), 70.2 (C<sub>3</sub>), 67.7 (C<sub>4</sub>), 67.1 (C<sub>7</sub>), 65.2 (C<sub>2</sub>), 64.9 (C<sub>10</sub>), 61.9 (C<sub>6</sub>), 51.7 (C<sub>16</sub>), 51.1 (C<sub>8</sub>), 35.5 (C<sub>9</sub>). MS (ESI): m/z calculated for [C<sub>20</sub>H<sub>35</sub>N<sub>10</sub>O<sub>8</sub>]<sup>+</sup>: 543.26 [M + H]<sup>+</sup>, found: 543.55; m/z calculated for [C<sub>20</sub>H<sub>34</sub>N<sub>10</sub>NaO<sub>8</sub>]<sup>+</sup>: 565.25 [M + Na]<sup>+</sup>, found: 565.52.

### ii) Guanidinylation reaction<sup>[5]</sup>

The TFA salt **20** (150 mg, 0.23 mmol, 1 eq.) was dissolved in H<sub>2</sub>O (1.9 mL) and diluted with 1,4-dioxane (9.6 mL), then 1,3-Di-Boc-2-(trifluoromethylsulfonyl)guanidine **6** (107.3 mg, 0.27 mmol, 1.2 eq) was added. After five minutes, triethylamine (95 μL, 0.69 mmol, 3 eq) was slowly added and the reaction stirred at room temperature overnight. Upon completion (TLC monitoring, CH<sub>2</sub>Cl<sub>2</sub>:MeOH 9:1, R<sub>f</sub>(**21**): 0.55) the mixture was diluted with AcOEt and washed with brine three-times. The organic phase was dried over Na<sub>2</sub>SO<sub>4</sub>, filtered and concentrated *in vacuo*. The crude was purified via automated flash chromatography (CH<sub>2</sub>Cl<sub>2</sub> with a MeOH gradient from 0% to 20%) to obtain the pure product **21** as a white foam (128.1 mg, 71%).

$^1\text{H-NMR}$  (400MHz,  $\text{CD}_3\text{OD}$ ):  $\delta(\text{ppm}) = 8.13$  (s, 1H,  $\text{H}_{\text{TrCH}}$ ), 8.04 (brs, 1H,  $\text{H}_{\text{TrCH}^*}$ ), 5.06 (s, 1H,  $\text{H}_1$ ), 5.01 (dd, 1H,  $J_{2-3} = 5.1$  Hz,  $J_{2-1} = 1.2$  Hz,  $\text{H}_2$ ), 4.72-4.60 (m, 6H,  $\text{H}_8$ ,  $\text{H}_{10}$ ,  $\text{H}_9$ ), 4.22-4.13 (m, 1H,  $\text{H}_{7a}$ ), 4.06 (dd, 1H,  $J_{3-4} = 9.7$  Hz,  $J_{3-2} = 5.1$  Hz,  $\text{H}_3$ ), 3.98-3.90 (m, 1H,  $\text{H}_{7b}$ ), 3.86-3.76 (m, 2H,  $\text{H}_6$ ), 3.70-3.60 (m, 11H,  $\text{H}_4$ ,  $\text{H}_{11}$ - $\text{H}_{15}$ ), 3.41-3.31 (m, 3H,  $\text{H}_5$ ,  $\text{H}_{16}$ ), 1.52 (s, 9H,  $\text{H}_{\text{tBu}}$ ), 1.48 (s, 9H,  $\text{H}_{\text{tBu}}$ ).  $^{13}\text{C-NMR}$  (400MHz,  $\text{CD}_3\text{OD}$ ):  $\delta(\text{ppm}) = 164.4$  ( $\text{COOtBu}$ ), 157.4 ( $\text{COOtBu}$ ), 153.9 ( $\text{C}_{17}$ ), 146.0 ( $\text{C}_{\text{Trq}}$ ), 144.8 ( $\text{C}_{\text{Trq}}$ ), 125.8 ( $\text{C}_{\text{TrCH}}$ ), 124.8 ( $\text{C}_{\text{TrCH}}$ ), 99.2 ( $\text{C}_1$ ), 84.5 ( $\text{C}_{\text{quattBu}}$ ), 80.5 ( $\text{C}_{\text{quattBu}}$ ), 75.2 ( $\text{C}_5$ ), 71.6, 71.5, 71.4 ( $\text{C}_{12}$ ,  $\text{C}_{13}$ ,  $\text{C}_{14}$ ), 71.0 ( $\text{C}_{15}$ ), 70.8 ( $\text{C}_{11}$ ), 70.3 ( $\text{C}_3$ ), 67.7 ( $\text{C}_4$ ), 67.0 ( $\text{C}_7$ ), 65.2 ( $\text{C}_2$ ), 65.0 ( $\text{C}_{10}$ ), 62.2 ( $\text{C}_6$ ), 51.7 ( $\text{C}_{16}$ ), 51.0 ( $\text{C}_8$ ), 36.9 ( $\text{C}_9$ ), 28.6 ( $\text{tBu}$ ), 28.2 ( $\text{tBu}$ ). MS (ESI): m/z calculated for  $[\text{C}_{31}\text{H}_{53}\text{N}_{12}\text{O}_{12}]^+$  : 785.39  $[\text{M} + \text{H}]^+$ , found: 785.40; m/z calculated for  $[\text{C}_{31}\text{H}_{52}\text{N}_{12}\text{NaO}_{12}]^+$  : 807.37  $[\text{M} + \text{Na}]^+$ , found: 807.44. HRMS (ESI): m/z calculated for  $[\text{C}_{31}\text{H}_{52}\text{N}_{12}\text{NaO}_{12}]^+$  : 807.3725  $[\text{M} + \text{Na}]^+$ , found: 807.3718.

## Synthesis of Rod3

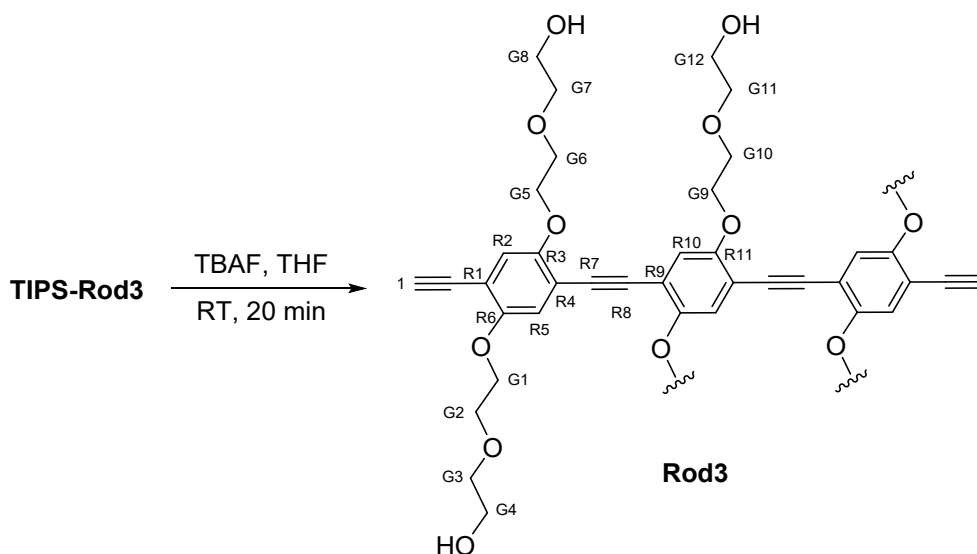

To a solution of **TIPS-Rod3**<sup>[7]</sup> (80 mg, 0.063 mmol, 1 eq) in dry THF (1.6 mL), TBAF (1M, 130  $\mu$ L, 0.13 mmol, 2 eq) was added. The reaction was stirred at room temperature under nitrogen atmosphere for 20 min. Upon completion (TLC monitoring  $\text{CH}_2\text{Cl}_2$ :MeOH 9:1,  $R_f(\mathbf{Rod3})$ : 0.38) the solvent was removed under reduced pressure and crude product purified via automated flash chromatography ( $\text{CHCl}_3$  with MeOH gradient from 0% to 25%) to obtain pure product as a yellow solid (41.7 mg, 70%)

$^1\text{H-NMR}$  (400MHz,  $\text{CD}_3\text{OD}$ ):  $\delta(\text{ppm}) = 7.16$  (s, 2H,  $\text{H}_{\text{R}2}$ ), 7.14 (s, 2H,  $\text{H}_{\text{R}5}$ ), 7.11 (s, 2H,  $\text{H}_{\text{R}10}$ ), 4.27-4.18 (m, 12H,  $\text{H}_{\text{G}1}$ ,  $\text{H}_{\text{G}5}$ ,  $\text{H}_{\text{G}9}$ ), 3.93-3.86 (m, 12H,  $\text{H}_{\text{G}2}$ ,  $\text{H}_{\text{G}6}$ ,  $\text{H}_{\text{G}10}$ ), 3.76 (s, 2H,  $\text{H}_1$ ), 3.72-3.65 (m, 24H,  $\text{H}_{\text{G}3}$ ,  $\text{H}_{\text{G}4}$ ,  $\text{H}_{\text{G}7}$ ,  $\text{H}_{\text{G}8}$ ,  $\text{H}_{\text{G}11}$ ,  $\text{H}_{\text{G}12}$ ).

## Synthesis of **PM68**

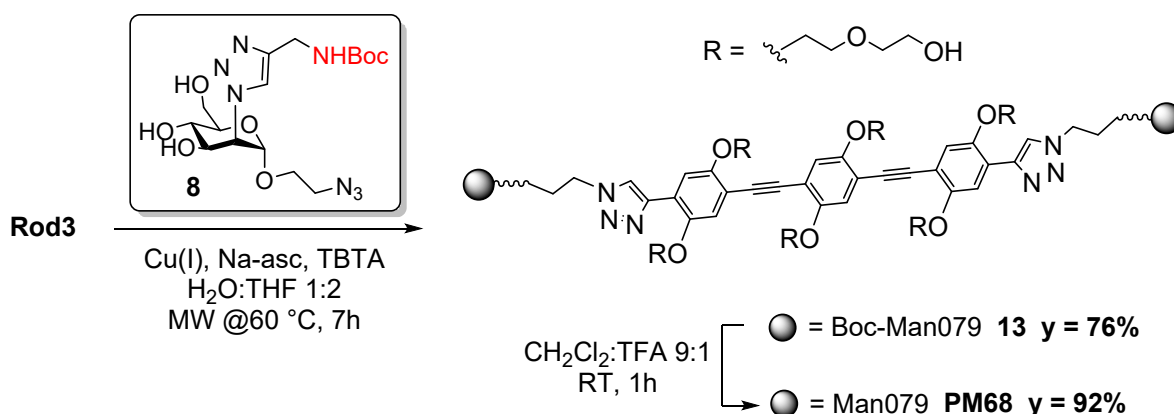

### CuAAC reaction

Synthesized from **Rod3** (21 mg, 0.02 mmol) and **8 (Boc-Man79-N<sub>3</sub>)** according to general procedure B for CuAAC reaction. The reaction was stirred under MW irradiation at 60 °C for 7 hours. Crude product was purified via automated reverse phase chromatography (H<sub>2</sub>O with a MeOH gradient from 0% to 100%) to obtain product **13** as a yellow foam (30.2 mg, 76%)

R<sub>f</sub>(**13**): 0.44 in H<sub>2</sub>O:CH<sub>3</sub>CN 1:1

<sup>1</sup>H-NMR (400MHz, CD<sub>3</sub>OD): δ(ppm)= 8.66 (s, 2H, H<sub>TC5</sub>), 8.01 (s, 2H, H<sub>TRCH</sub>), 7.87 (s, 2H, H<sub>R2</sub>), 7.24 (s, 2H, H<sub>R5</sub>), 7.18 (s, 2H, H<sub>R10</sub>), 5.07 (s, 2H, H<sub>1</sub>), 5.02 (d, 2H, J<sub>2-3</sub> = 5.1 Hz, H<sub>2</sub>), 4.80-4.69 (m, 4H, H<sub>8</sub>), 4.35 (t, 4H, J<sub>G9-G10</sub> = 4.4 Hz, H<sub>G9</sub>), 4.32-4.18 (m, 14H, H<sub>9</sub>, H<sub>G1</sub>, H<sub>G5</sub>, H<sub>7a</sub>), 4.09 (dd, 2H, J<sub>3-4</sub> = 9.6 Hz, J<sub>3-2</sub> = 5.1 Hz, H<sub>3</sub>), 4.07-4.01 (m, 2H, H<sub>7b</sub>), 3.99-3.89 (m, 12H, H<sub>G10</sub>, H<sub>G2</sub>, H<sub>G6</sub>), 3.83-3.63 (m, 30H, H<sub>4</sub>, H<sub>G4</sub>, H<sub>G8</sub>, H<sub>G12</sub>, H<sub>G3</sub>, H<sub>G7</sub>, H<sub>G11</sub>, H<sub>6</sub>), 3.45-3.39 (m, 2H, H<sub>5</sub>), 1.43 (s, 18H, H<sub>tBu</sub>). <sup>13</sup>C-NMR (400MHz, CD<sub>3</sub>OD): δ(ppm) extrapolated from HSQC = 125.5 (C<sub>TC5</sub>), 122.8 (C<sub>TRCH</sub>), 117.6 (C<sub>R10</sub>), 116.9 (C<sub>R5</sub>), 111.7 (C<sub>R2</sub>), 97.6 (C<sub>1</sub>), 73.2 (C<sub>5</sub>), 72.7 (C<sub>G3</sub>, C<sub>G7</sub>, C<sub>G11</sub>), 72.3 (C<sub>G4</sub>, C<sub>G8</sub>, C<sub>G12</sub>), 69.8 (C<sub>G5</sub>), 69.5 (C<sub>G10</sub>, C<sub>G2</sub>, C<sub>G6</sub>), 69.4 (C<sub>G9</sub>), 69.1 (C<sub>3</sub>), 67.7 (C<sub>G1</sub>), 66.2 (C<sub>4</sub>), 65.9 (C<sub>7</sub>), 63.7 (C<sub>2</sub>), 60.8 (C<sub>6</sub>), 49.7 (C<sub>8</sub>), 35.2 (C<sub>9</sub>), 27.1 (tBu).

### Boc deprotection

Compound **13** (15 mg, 8 μmol, 1 eq.) was dissolved in a 9:1 mixture of dry CH<sub>2</sub>Cl<sub>2</sub> and TFA (800 μL). The reaction was stirred at room temperature, under N<sub>2</sub> for 30 min. Upon completion (<sup>1</sup>H-NMR monitoring, CD<sub>3</sub>OD) the mixture was concentrated *in vacuo* and co-evaporated with toluene three-times. Crude product was purified via semi-preparative HPLC (using the conditions reported below) to obtain the pure product **PM68** as bis-formate salt (12.5 mg, 92%).

**HPLC**: Flow: 10 mL/min; UV channels: 210 nm; 254 nm; A: H<sub>2</sub>O + 0.1% HCO<sub>2</sub>H, B: CH<sub>3</sub>CN.  
Gradient: 0-1 min: 20% B, 1-11 min: 20 - 45% B; t<sub>r</sub> (**PM68**) = 6.79 min

<sup>1</sup>H-NMR (400MHz, DMSO-d<sub>6</sub>): δ(ppm)= 8.56 (s, 2H, H<sub>TC5</sub>), 8.23 (s, 2H, FA), 8.13 (s, 2H, H<sub>TrCH</sub>), 7.85 (s, 2H, H<sub>R2</sub>), 7.22 (s, 2H, H<sub>R5</sub>), 7.15 (s, 2H, H<sub>R10</sub>), 5.43 (d, 2H, J<sub>OH-3</sub> = 3.3 Hz, OH-3), 5.18 (d, 2H, J<sub>OH-4</sub> = 4.5 Hz, OH-4), 4.99 (s, 2H, H<sub>1</sub>), 4.88 (d, 2H, J<sub>2-3</sub> = 5.2 Hz, H<sub>2</sub>), 4.85-4.77 (m, 4H, OH-6, OH-Peg<sub>int</sub>), 4.74-4.62 (m, 8H, H<sub>8</sub>, OH-Peg<sub>ext</sub>), 4.29-4.18 (m, 12H, H<sub>G1</sub>, H<sub>G5</sub>, H<sub>G9</sub>), 4.09-4.06 (m, 2H, H<sub>7b</sub>), 4.01 (s, 4H, H<sub>9</sub>), 3.98-3.80 (m, 10H, H<sub>7b</sub>, H<sub>G2</sub>, H<sub>G6</sub>).

HRMS (ESI):

| Molecular formula                                                                                 | Ion                        | Calcd. value (m/z) | Exp. value (m/z)       |
|---------------------------------------------------------------------------------------------------|----------------------------|--------------------|------------------------|
| [C <sub>72</sub> H <sub>101</sub> N <sub>14</sub> O <sub>28</sub> ] <sup>+</sup>                  | [M + H] <sup>+</sup>       | 1609.6904          | 1609.6925 <sup>i</sup> |
| [C <sub>72</sub> H <sub>100</sub> N <sub>14</sub> NaO <sub>28</sub> ] <sup>+</sup>                | [M + Na] <sup>+</sup>      | 1631.6724          | 1631.6783 <sup>i</sup> |
| [C <sub>72</sub> H <sub>99</sub> N <sub>14</sub> Na <sub>2</sub> O <sub>28</sub> ] <sup>+</sup>   | [M + 2Na - H] <sup>+</sup> | 1653.6543          | 1653.6533 <sup>i</sup> |
| [C <sub>72</sub> H <sub>102</sub> N <sub>14</sub> O <sub>28</sub> ] <sup>2+</sup>                 | [M + 2H] <sup>2+</sup>     | 805.3494           | 805.3481               |
| [C <sub>72</sub> H <sub>101</sub> N <sub>14</sub> NaO <sub>28</sub> ] <sup>2+</sup>               | [M + Na + H] <sup>2+</sup> | 816.3404           | 816.3390               |
| [C <sub>72</sub> H <sub>100</sub> N <sub>14</sub> Na <sub>2</sub> O <sub>28</sub> ] <sup>2+</sup> | [M + 2Na] <sup>2+</sup>    | 827.3313           | 827.3302               |

<sup>i</sup> found after deconvolution.

Analytical HPLC: Flow: 1 mL/min; UV channel: 360 nm; A: H<sub>2</sub>O + 0.1% HCO<sub>2</sub>H, B: CH<sub>3</sub>CN + 0.1% HCO<sub>2</sub>H.

Gradient: 0-2 min: 20% B, 2-11 min: 20 - 65% B; 11-14 min: 65 - 100% B; t<sub>r</sub>

(**PM68**) = 6.4 min

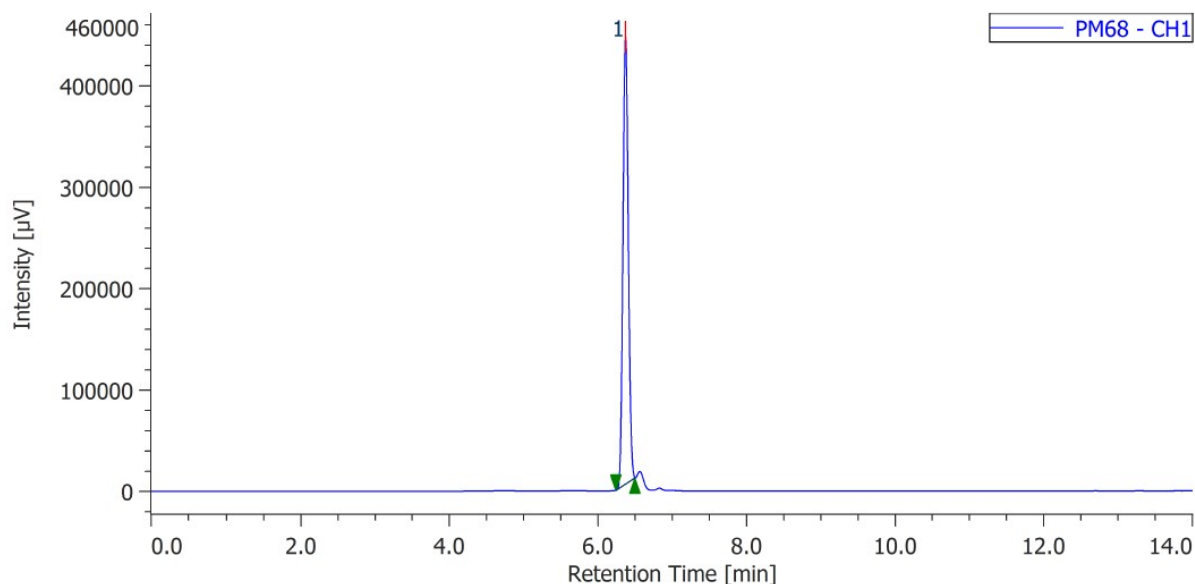



# Synthesis of **PM69**

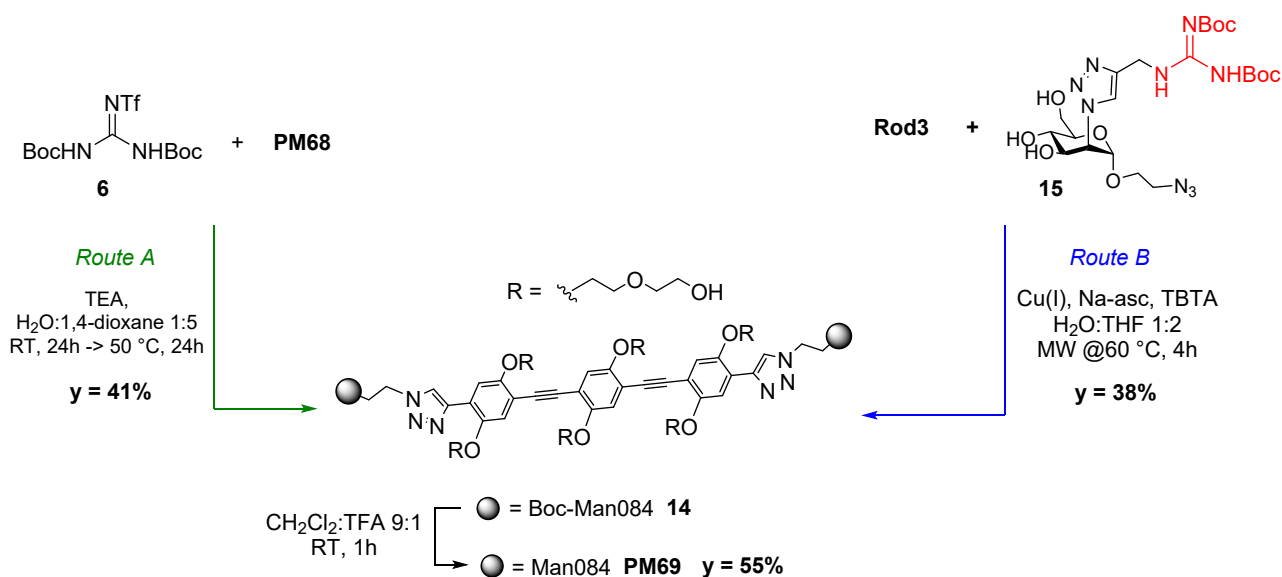

## Route A) Guanidinylation reaction<sup>[5]</sup>

Dimer **PM68** (13.4 mg, 7 μmol, 1 eq.) was dissolved in H<sub>2</sub>O (24 μL) and diluted with 1,4-dioxane (120 μL), then 1,3-Di-Boc-2-(trifluoromethylsulfonyl)guanidine **6** (13.7 mg, 35 μmol, 5 eq) was added. After five minutes, triethylamine (13 μL, 86 μmol, 7 eq) was slowly dropped into the mixture and the reaction was stirred at room temperature. After 24 hours, **6** (13.7 mg, 35 μmol, 5 eq) and triethylamine (13 μL, 86 μmol, 7 eq) were ulteriorly added to the mixture, which was stirred at 50 °C for further 24 hours. Upon completion (TLC and NMR monitoring), the solvents were removed under reduced pressure. Crude product was purified via size-exclusion chromatography on a Sephadex LH-20 column (Ø 3 cm, H 55 cm; eluent: MeOH) to obtain pure product **14** as a yellow foam (6.01 mg, 41%).

## Route B) CuAAC reaction

Synthesized from **Rod3** (23 mg, 0.024 mmol) and **15 (Boc-Man84-N<sub>3</sub>)** according to general procedure B for CuAAC reaction. The reaction was stirred under MW irradiation at 60 °C for 4 hours. Crude product was purified via size-exclusion chromatography on a Sephadex LH-20 column (Ø 3 cm, H 55 cm; eluent: MeOH) to obtain pure product **14** as a yellow foam (19 mg, 38%).

R<sub>f</sub>(**14**): 0.64 in H<sub>2</sub>O:CH<sub>3</sub>CN 1:1

<sup>1</sup>H-NMR (400MHz, CD<sub>3</sub>OD): δ(ppm)= 8.61 (s, 2H, H<sub>TC5</sub>), 8.14 (s, 2H, H<sub>TRCH</sub>), 7.86 (s, 2H, H<sub>R2</sub>), 7.20 (s, 2H, H<sub>R5</sub>), 7.15 (s, 2H, H<sub>R10</sub>), 5.09 (s, 2H, H<sub>1</sub>), 5.04 (d, 2H, J<sub>2-3</sub> = 5.1 Hz, H<sub>2</sub>), 4.79-4.67 (m, 4H, H<sub>8</sub>), 4.67-4.54 (m, 4H, H<sub>9</sub>), 4.34 (t, 4H, J<sub>G9-G10</sub> = 4.5 Hz, H<sub>G9</sub>), 4.30-4.18 (m, 10H, H<sub>G1</sub>, H<sub>G5</sub>, H<sub>7a</sub>), 4.11 (dd, 2H, J<sub>3-4</sub> = 9.6 Hz, J<sub>3-2</sub> = 5.1 Hz, H<sub>3</sub>), 4.06-3.99 (m, 2H, H<sub>7b</sub>), 3.98-3.90 (m, 12H, H<sub>G10</sub>, H<sub>G2</sub>, H<sub>G6</sub>), 3.81-3.65 (m, 30H, H<sub>4</sub>, H<sub>G4</sub>, H<sub>G8</sub>, H<sub>G12</sub>, H<sub>G3</sub>, H<sub>G7</sub>, H<sub>G11</sub>, H<sub>6</sub>), 3.48-3.40 (m, 2H, H<sub>5</sub>), 1.50 (s, 18H, H<sub>tBu</sub>), 1.47 (s, 18H, H<sub>tBu</sub>). <sup>13</sup>C-NMR (400MHz, CD<sub>3</sub>OD): δ(ppm) = 155.3, 154.9 (C<sub>R6</sub>, C<sub>R11</sub>), 154.1 (C<sub>10</sub>), 150.5 (C<sub>R3</sub>), 126.9 (C<sub>TC5</sub>), 122.3 (C<sub>R1</sub>), 119.1 (C<sub>R10</sub>), 118.4 (C<sub>R5</sub>), 115.9, 114.5 (C<sub>R4</sub>, C<sub>R9</sub>), 113.0 (C<sub>R2</sub>), 99.2 (C<sub>1</sub>), 92.8, 91.7 (C<sub>R7</sub>, C<sub>R8</sub>), 84.6 (C<sub>quattBu</sub>), 80.6 (C<sub>quattBu</sub>), 75.3

(C<sub>5</sub>), 74.1, 73.7 (C<sub>G3</sub>, C<sub>G7</sub>, C<sub>G11</sub>), 70.9 (C<sub>G9</sub>, C<sub>G5</sub> or C<sub>G1</sub>), 70.8 (C<sub>G2</sub>, C<sub>G6</sub>), 70.6 (C<sub>G10</sub>), 70.3 (C<sub>3</sub>), 69.3 (C<sub>G1</sub> or C<sub>G5</sub>), 67.7 (C<sub>4</sub>), 67.2 (C<sub>7</sub>), 65.3 (C<sub>2</sub>), 62.4, 62.3, 62.2, 62.1 (C<sub>G4</sub>, C<sub>G8</sub>, C<sub>G12</sub>, C<sub>6</sub>), 51.0 (C<sub>8</sub>), 37.0 (C<sub>9</sub>), 28.6 (*t*Bu), 28.2 (*t*Bu).

MS (MALDI, matrix: DHB, solvent: MeOH):

| Molecular formula                                                                | Ion                         | Calcd. value (m/z) | Exp. value (m/z) |
|----------------------------------------------------------------------------------|-----------------------------|--------------------|------------------|
| [C <sub>89</sub> H <sub>129</sub> N <sub>18</sub> O <sub>34</sub> ] <sup>+</sup> | [M - 1Boc + H] <sup>+</sup> | 1993.892           | 1994.935         |
| [C <sub>84</sub> H <sub>121</sub> N <sub>18</sub> O <sub>32</sub> ] <sup>+</sup> | [M - 2Boc + H] <sup>+</sup> | 1893.839           | 1894.914         |
| [C <sub>79</sub> H <sub>113</sub> N <sub>18</sub> O <sub>30</sub> ] <sup>+</sup> | [M - 3Boc + H] <sup>+</sup> | 1793.787           | 1794.763         |
| [C <sub>74</sub> H <sub>105</sub> N <sub>18</sub> O <sub>28</sub> ] <sup>+</sup> | [M - 4Boc + H] <sup>+</sup> | 1693.735           | 1694.096         |

### Boc-deprotection

Compound **14** (19 mg, 9 μmol, 1 eq.) was dissolved in a 9:1 mixture of dry CH<sub>2</sub>Cl<sub>2</sub> and TFA (900 μL). The reaction was stirred at room temperature, under N<sub>2</sub> for 1 min. Upon completion (<sup>1</sup>H-NMR monitoring, CD<sub>3</sub>OD) the mixture was concentrated *in vacuo* and co-evaporated with toluene three-times. Crude product was purified via semi-preparative HPLC (using the conditions reported below) to obtain the pure product **PM69** as bis-formate salt (8.9 mg, 55%; yellow foam).

HPLC: Flow: 10 mL/min; UV channels: 210 nm; 254 nm; A: H<sub>2</sub>O + 0.1% HCO<sub>2</sub>H, B: CH<sub>3</sub>CN.

Gradient: 0-5 min: 0% B, 5-20 min: 0 - 45% B; t<sub>r</sub> (**PM69**) = 16.29 min

<sup>1</sup>H-NMR (400MHz, DMSO-d<sub>6</sub>): δ(ppm)= 8.73 (brs, 2H, NH), 8.57 (s, 2H, H<sub>TC5</sub>), 8.49 (brs, 2H, FA), 8.16 (s, 2H, H<sub>TRCH</sub>), 7.88-7.75 (m, 8H, H<sub>R2</sub>, NH, NH<sub>2</sub>), 7.22 (s, 2H, H<sub>R5</sub>), 7.16 (s, 2H, H<sub>R10</sub>), 5.49 (brs, 2H, OH-3), 5.31 (brs, 2H, OH-4), 5.05 (s, 2H, H<sub>1</sub>), 4.94-4.85 (m, 4H, H<sub>2</sub>, OH-6), 4.83-4.58 (m, 10H, H<sub>8</sub>, OH-Peg), 4.38 (s, 4H, H<sub>9</sub>), 4.31-4.19 (m, 12H, H<sub>G1</sub>, H<sub>G5</sub>, H<sub>G9</sub>), 4.12-4.04 (m, 2H, H<sub>7a</sub>), 4.00-3.80 (m, 16H, H<sub>7b</sub>, H<sub>3</sub>, H<sub>G2</sub>, H<sub>G6</sub>, H<sub>G10</sub>), 3.71-3.49 (m, 30H, H<sub>6</sub>, H<sub>4</sub>, H<sub>G4</sub>, H<sub>G8</sub>, H<sub>G12</sub>, H<sub>G3</sub>, H<sub>G7</sub>, H<sub>G11</sub>), 3.44-3.39 (m, 2H, H<sub>5</sub>). <sup>13</sup>C-NMR (400MHz, CD<sub>3</sub>OD): δ(ppm) extrapolated from HSQC = 156.9 (FA), 125.2 (C<sub>TC5</sub>), 123.3 (C<sub>TRCH</sub>), 117.8 (C<sub>R10</sub>), 117.5 (C<sub>R5</sub>), 111.7 (C<sub>R2</sub>), 97.5 (C<sub>1</sub>), 74.8 (C<sub>5</sub>), 73.2 (C<sub>G4</sub>, C<sub>G8</sub>, C<sub>G12</sub>, C<sub>G3</sub>, C<sub>G7</sub>, C<sub>G11</sub>), 69.5 (C<sub>G10</sub>, C<sub>G2</sub>, C<sub>G6</sub>), 68.9 (C<sub>3</sub>, C<sub>G9</sub>, C<sub>G1</sub>, C<sub>G5</sub>), 66.5 (C<sub>4</sub>), 65.8 (C<sub>7</sub>), 64.0 (C<sub>2</sub>), 60.6 (C<sub>6</sub>), 49.9 (C<sub>8</sub>), 36.7 (C<sub>9</sub>).

HRMS

(ESI):

| Molecular formula                                                                                 | Ion                         | Calcd. value (m/z) | Exp. value (m/z)       |
|---------------------------------------------------------------------------------------------------|-----------------------------|--------------------|------------------------|
| [C <sub>74</sub> H <sub>105</sub> N <sub>18</sub> O <sub>28</sub> ] <sup>+</sup>                  | [M + H] <sup>+</sup>        | 1693.7346          | 1693.7382 <sup>i</sup> |
| [C <sub>74</sub> H <sub>104</sub> N <sub>18</sub> NaO <sub>28</sub> ] <sup>+</sup>                | [M + Na] <sup>+</sup>       | 1715.7165          | 1715.7208 <sup>i</sup> |
| [C <sub>74</sub> H <sub>106</sub> N <sub>18</sub> O <sub>28</sub> ] <sup>2+</sup>                 | [M + 2H] <sup>2+</sup>      | 847.3712           | 847.3713               |
| [C <sub>74</sub> H <sub>105</sub> N <sub>18</sub> NaO <sub>28</sub> ] <sup>2+</sup>               | [M + Na + H] <sup>2+</sup>  | 858.3622           | 858.3618               |
| [C <sub>74</sub> H <sub>104</sub> N <sub>18</sub> Na <sub>2</sub> O <sub>28</sub> ] <sup>2+</sup> | [M + 2Na] <sup>2+</sup>     | 869.3531           | 869.3525               |
| [C <sub>74</sub> H <sub>106</sub> N <sub>18</sub> NaO <sub>28</sub> ] <sup>3+</sup>               | [M + 2H + Na] <sup>3+</sup> | 572.5774           | 572.5781               |
| [C <sub>74</sub> H <sub>156</sub> N <sub>18</sub> Na <sub>2</sub> O <sub>28</sub> ] <sup>3+</sup> | [M + 2Na + H] <sup>3+</sup> | 579.9047           | 579.9049               |
| [C <sub>74</sub> H <sub>104</sub> N <sub>18</sub> Na <sub>3</sub> O <sub>28</sub> ] <sup>3+</sup> | [M + 3Na] <sup>3+</sup>     | 587.2320           | 587.2321               |

<sup>i</sup> found after deconvolution.

Analytical HPLC: Flow: 1 mL/min; UV channels: 360 nm; A: H<sub>2</sub>O + 0.1% HCO<sub>2</sub>H, B: CH<sub>3</sub>CN + 0.1% HCO<sub>2</sub>H.

Gradient: 0-5 min: 0% B, 5-20 min: 0 - 45% B; 20-23 min: 45 - 100% B; t<sub>r</sub> (**PM69**)

= 16.8 min

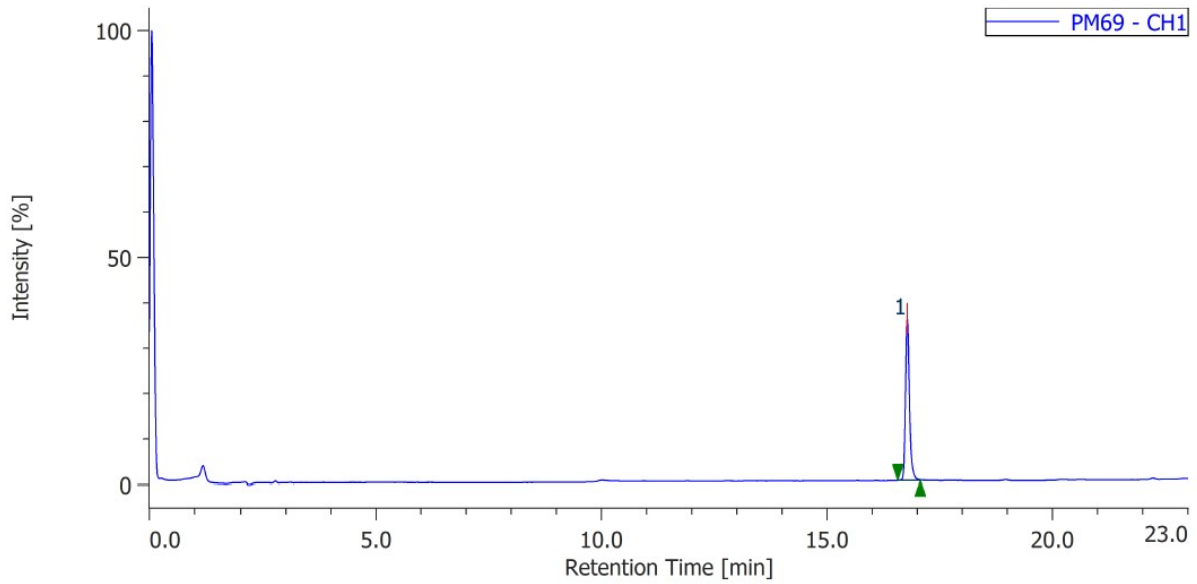

## Synthesis of PM70

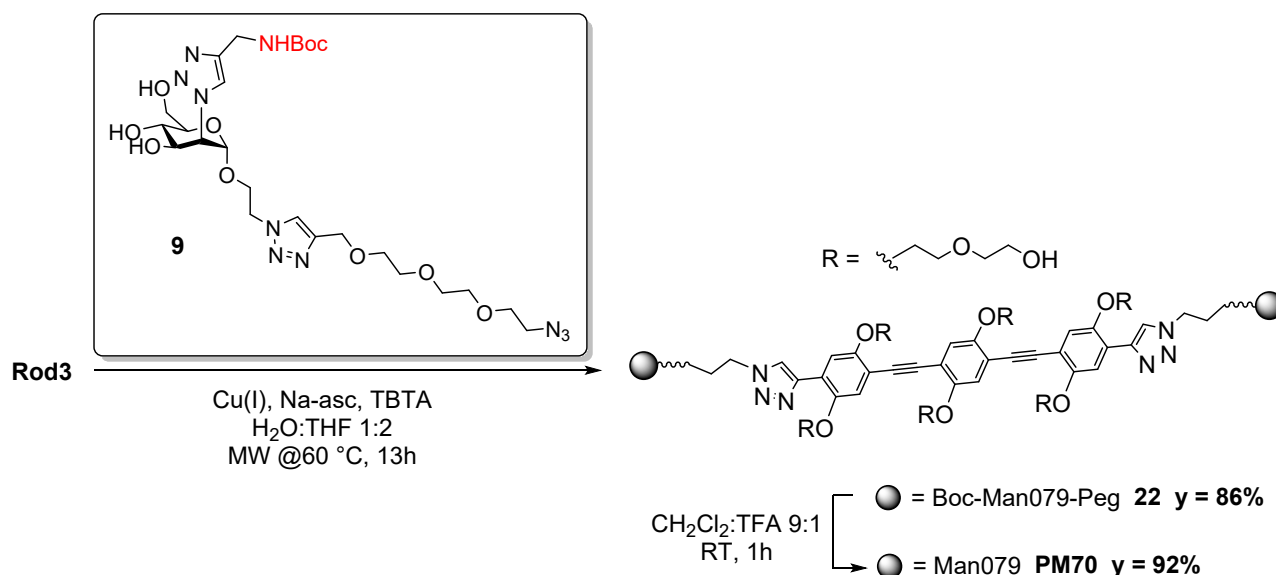

### CuAAC reaction

Synthesized from **Rod3** (25 mg, 0.026 mmol) and **9** (Boc-Man79-Peg-N<sub>3</sub>) according to general procedure B for CuAAC reaction. The reaction was stirred under MW irradiation at 60 °C for 13 hours. Crude product was purified via size-exclusion chromatography on a Sephadex LH-20 column (Ø 3 cm, H 55 cm; eluent: MeOH) to obtain pure product **22** as a yellow foam (50 mg, 86%).

R<sub>f</sub>(**22**): 0.72 in H<sub>2</sub>O:CH<sub>3</sub>CN 1:1

<sup>1</sup>H-NMR (400MHz, CD<sub>3</sub>OD): δ(ppm)= 8.59 (s, 2H, H<sub>TC5</sub>), 8.01 (s, 2H, H<sub>TrCH</sub>), 7.90 (s, 2H, H<sub>TrCH'</sub>), 7.85 (s, 2H, H<sub>R2</sub>), 7.22 (s, 2H, H<sub>R5</sub>), 7.18 (s, 2H, H<sub>R10</sub>), 5.00 (s, 2H, H<sub>1</sub>), 4.97 (d, 2H, J<sub>2-3</sub> = 5.2 Hz, H<sub>2</sub>), 4.70-4.61 (m, 8H, H<sub>8</sub>, H<sub>16</sub>), 4.53 (s, 4H, H<sub>10</sub>), 4.34 (t, 4H, J<sub>G9-G10</sub> = 4.4 Hz, H<sub>G9</sub>), 4.30-4.24 (m, 12H, H<sub>G1</sub>, H<sub>G5</sub>, H<sub>9</sub>), 4.16-4.09 (m, 2H, H<sub>7a</sub>), 4.03 (dd, 2H, J<sub>3-4</sub> = 9.5 Hz, J<sub>3-2</sub> = 5.2 Hz, H<sub>3</sub>), 3.98-3.87 (m, 18H, H<sub>G10</sub>, H<sub>G2</sub>, H<sub>G6</sub>, H<sub>7b</sub>, H<sub>15</sub>), 3.81-3.66 (m, 30H, H<sub>4</sub>, H<sub>G4</sub>, H<sub>G8</sub>, H<sub>G12</sub>, H<sub>G3</sub>, H<sub>G7</sub>, H<sub>G11</sub>, H<sub>6</sub>), 3.65-3.57 (m, 10H, H<sub>11</sub>, H<sub>14</sub>, H<sub>5</sub>), 3.54 (s, 8H, H<sub>12</sub>, H<sub>13</sub>), 1.42 (s, 18H, H<sub>tBu</sub>). <sup>13</sup>C-NMR (400MHz, CD<sub>3</sub>OD): δ(ppm) extrapolated from HSQC = 125.4 (C<sub>TrCH'</sub>), 123.9 (C<sub>TrCH</sub>), 118.9 (C<sub>R10</sub>), 118.0 (C<sub>R5</sub>), 112.7 (C<sub>R2</sub>), 99.0 (C<sub>1</sub>), 73.6 (C<sub>G3</sub>, C<sub>G7</sub>, C<sub>G11</sub>, C<sub>5</sub>), 73.3 (C<sub>G4</sub>, C<sub>G8</sub>, C<sub>G12</sub>), 70.7 (C<sub>G9</sub>, C<sub>G1</sub> or C<sub>G5</sub>), 71.0 (C<sub>11</sub>, C<sub>12</sub>, C<sub>13</sub>, C<sub>14</sub>), 70.4 (C<sub>G10</sub>, C<sub>G2</sub>, C<sub>G6</sub>, C<sub>15</sub>), 69.9 (C<sub>3</sub>), 68.6 (C<sub>G1</sub> or C<sub>G5</sub>), 67.1 (C<sub>4</sub>), 66.9 (C<sub>7</sub>), 64.2 (C<sub>2</sub>), 64.6 (C<sub>10</sub>), 61.9 (C<sub>6</sub>), 51.0 (C<sub>8</sub>, C<sub>16</sub>), 36.5 (C<sub>9</sub>), 28.5 (tBu).

HRMS (ESI):

| Molecular formula                                                                                  | Ion                     | Calcd. value (m/z) | Exp. value (m/z)       |
|----------------------------------------------------------------------------------------------------|-------------------------|--------------------|------------------------|
| [C <sub>100</sub> H <sub>146</sub> N <sub>20</sub> NaO <sub>38</sub> ] <sup>+</sup>                | [M + Na] <sup>+</sup>   | 2258.0005          | 2258.9993 <sup>i</sup> |
| [C <sub>100</sub> H <sub>146</sub> N <sub>20</sub> Na <sub>2</sub> O <sub>38</sub> ] <sup>2+</sup> | [M + 2Na] <sup>2+</sup> | 1140.4951          | 1140.9943              |
| [C <sub>100</sub> H <sub>146</sub> N <sub>20</sub> Na <sub>3</sub> O <sub>38</sub> ] <sup>3+</sup> | [M + 3Na] <sup>3+</sup> | 767.9933           | 767.9913               |

<sup>i</sup> found after deconvolution.

### Boc-deprotection

Compound **22** (22 mg, 10  $\mu$ mol, 1 eq.) was dissolved in a 9:1 mixture of dry  $\text{CH}_2\text{Cl}_2$  and TFA (980  $\mu$ L). The reaction was stirred at room temperature, under  $\text{N}_2$  for 40 min. Upon completion ( $^1\text{H-NMR}$  monitoring,  $\text{CD}_3\text{OD}$ ) the mixture was concentrated *in vacuo* and co-evaporated with toluene three-times. Crude product was purified via semi-preparative HPLC (using the conditions reported below) to obtain the pure product **PM70** as bis-formate salt (19.5 mg, 92%; yellow foam).

HPLC: Flow: 10 mL/min; UV channels: 210 nm; 254 nm; A:  $\text{H}_2\text{O}$  + 0.1%  $\text{HCO}_2\text{H}$ , B:  $\text{CH}_3\text{CN}$ .

Gradient: 0-1 min: 0% B, 1-25 min: 0 - 40% B;  $t_r$  (**PM70**) = 19.09 min

$^1\text{H-NMR}$  (400MHz,  $\text{DMSO-d}_6$ ):  $\delta$ (ppm)= 8.51 (s, 2H,  $\text{H}_{\text{TC5}}$ ), 8.45 (brs, 2H, FA), 8.07 (s, 2H,  $\text{H}_{\text{TRCH}}$ ), 7.97 (s, 2H,  $\text{H}_{\text{TRCH}}$ ), 7.86 (s, 2H,  $\text{H}_{\text{R2}}$ ), 7.22 (s, 2H,  $\text{H}_{\text{R5}}$ ), 7.15 (s, 2H,  $\text{H}_{\text{R10}}$ ), 5.35 (brs, 2H, OH-3), 5.18 (brs, 2H, OH-4), 4.96 (s, 2H,  $\text{H}_1$ ), 4.87-4.82 (m, 2H,  $\text{H}_2$ ), 4.77 (brs, 2H, OH-6), 4.68-4.56 (m, 10H,  $\text{H}_8$ , OH-Peg), 4.51 (s, 4H,  $\text{H}_{10}$ ), 4.23 (m, 12H,  $\text{H}_{\text{G1}}$ ,  $\text{H}_{\text{G9}}$ ,  $\text{H}_{\text{G5}}$ ), 4.05-3.98 (m, 2H,  $\text{H}_{7a}$ ), 3.93-3.80 (m, 16H,  $\text{H}_{7b}$ ,  $\text{H}_3$ ,  $\text{H}_9$ ,  $\text{H}_{16}$ ,  $\text{H}_{\text{G6}}$ ), 3.76 (brs, 4H,  $\text{H}_{\text{G10}}$ ), 3.69-3.63 (m, 6H,  $\text{H}_4$ ,  $\text{H}_{\text{G2}}$ ), 3.60-3.49 (m, 50H,  $\text{H}_6$ ,  $\text{H}_5$ ,  $\text{H}_{11}$ - $\text{H}_{15}$ ,  $\text{H}_{\text{G4}}$ ,  $\text{H}_{\text{G8}}$ ,  $\text{H}_{\text{G12}}$ ,  $\text{H}_{\text{G3}}$ ,  $\text{H}_{\text{G7}}$ ,  $\text{H}_{\text{G11}}$ ).

HRMS (ESI):

| Molecular formula                                                         | Ion                                       | Calcd. value (m/z) | Exp. value (m/z)       |
|---------------------------------------------------------------------------|-------------------------------------------|--------------------|------------------------|
| $[\text{C}_{90}\text{H}_{131}\text{N}_{20}\text{O}_{34}]^+$               | $[\text{M} + \text{H}]^+$                 | 2035.9137          | 2035.9092 <sup>i</sup> |
| $[\text{C}_{90}\text{H}_{132}\text{N}_{20}\text{O}_{34}]^{2+}$            | $[\text{M} + 2\text{H}]^{2+}$             | 1018.4602          | 1018.4583              |
| $[\text{C}_{90}\text{H}_{131}\text{N}_{20}\text{NaO}_{34}]^{2+}$          | $[\text{M} + \text{Na} + \text{H}]^{2+}$  | 1029.4517          | 1029.4495              |
| $[\text{C}_{90}\text{H}_{130}\text{N}_{20}\text{Na}_2\text{O}_{34}]^{2+}$ | $[\text{M} + 2\text{Na}]^{2+}$            | 1040.4427          | 1040.4409              |
| $[\text{C}_{90}\text{H}_{133}\text{N}_{20}\text{O}_{34}]^{3+}$            | $[\text{M} + 3\text{H}]^{3+}$             | 679.3097           | 679.3086               |
| $[\text{C}_{90}\text{H}_{132}\text{N}_{20}\text{NaO}_3]^{3+}$             | $[\text{M} + 2\text{H} + \text{Na}]^{3+}$ | 686.6371           | 686.6359               |
| $[\text{C}_{90}\text{H}_{131}\text{N}_{20}\text{Na}_2\text{O}_{34}]^{3+}$ | $[\text{M} + 2\text{Na} + \text{H}]^{3+}$ | 693.9644           | 693.9632               |
| $[\text{C}_{90}\text{H}_{130}\text{N}_{20}\text{Na}_3\text{O}_{34}]^{3+}$ | $[\text{M} + 3\text{Na}]^{3+}$            | 701.2917           | 701.2906               |

<sup>i</sup> found after deconvolution.

Analytical HPLC: Flow: 1 mL/min; UV channel: 360 nm; A: H<sub>2</sub>O + 0.1% HCO<sub>2</sub>H, B: CH<sub>3</sub>CN + 0.1% HCO<sub>2</sub>H.

Gradient: 0-1 min: 0% B, 1-20 min: 0 - 40% B; 20-23 min: 40 - 100% B; t<sub>r</sub> (**PM70**) =

16.5 min

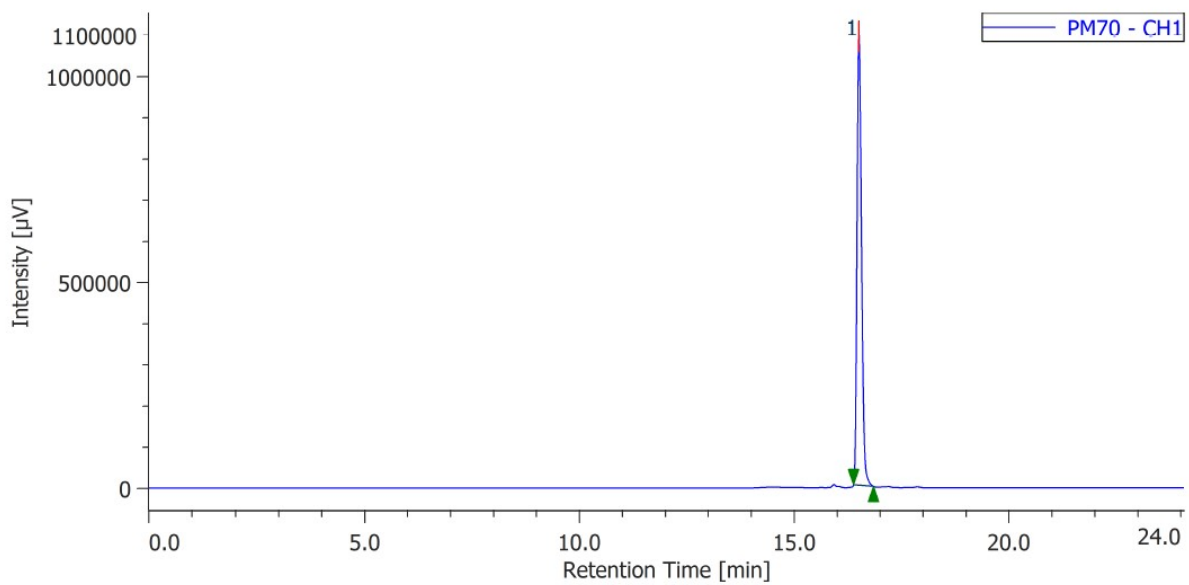

## Synthesis of **PM74**

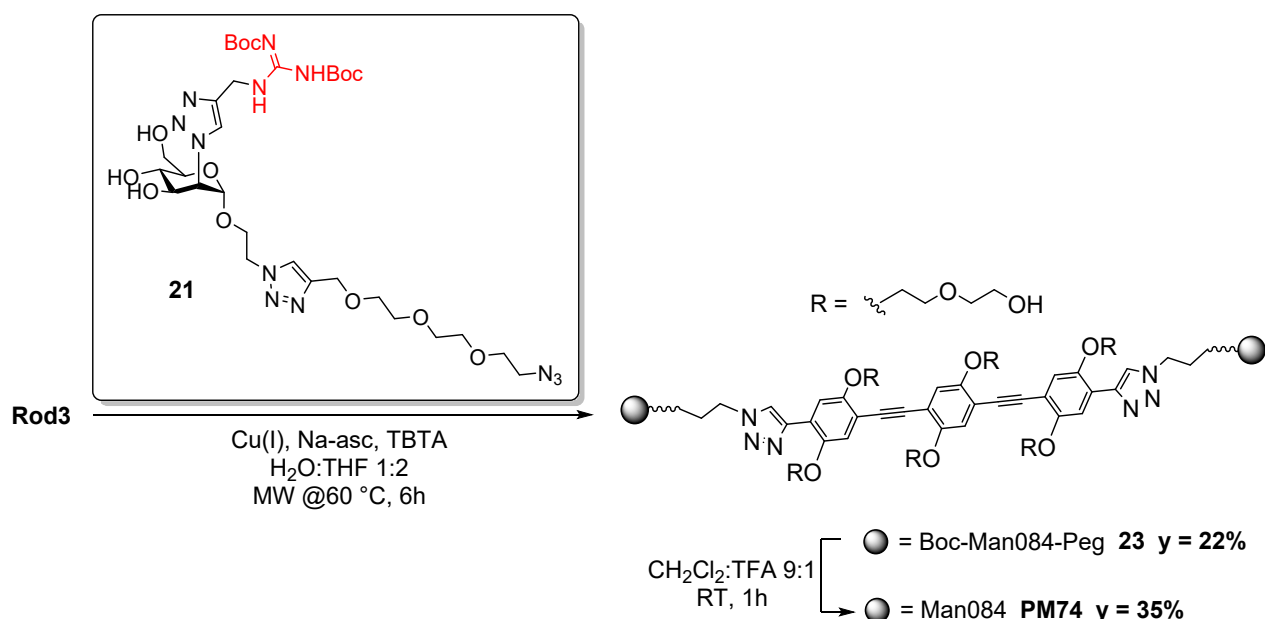

### CuAAC reaction

Synthesized from **Rod3** (45 mg, 0.047 mmol) and **21** (**Boc-Man84-Peg-N<sub>3</sub>**) according to general procedure D for CuAAC reaction. The reaction was stirred under MW irradiation at 60 °C for 6 hours. Crude product was purified via size-exclusion chromatography on a Sephadex LH-20 column (Ø 3 cm, H 55 cm; eluent: MeOH) to obtain pure product **23** as a yellow foam (25.5 mg, 22%).

$R_f(\mathbf{23})$ : 0.41 in H<sub>2</sub>O:CH<sub>3</sub>CN 1:1

<sup>1</sup>H-NMR (400MHz, CD<sub>3</sub>OD):  $\delta(\text{ppm}) = 8.59$  (s, 2H, H<sub>TC5</sub>), 8.14 (s, 2H, H<sub>TrCH</sub>), 7.94 (s, 2H, H<sub>TrCH</sub>), 7.87 (s, 2H, H<sub>R2</sub>), 7.24 (s, 2H, H<sub>R5</sub>), 7.19 (s, 2H, H<sub>R10</sub>), 5.03 (s, 2H, H<sub>1</sub>), 4.98 (d, 2H,  $J_{2-3} = 5.2$  Hz, H<sub>2</sub>), 4.70-4.52 (m, 16H, H<sub>8</sub>, H<sub>16</sub>, H<sub>9</sub>, H<sub>10</sub>), 4.34 (t, 4H,  $J_{9-10} = 4.4$  Hz, H<sub>9</sub>), 4.30-4.24 (m, 8H, H<sub>G1</sub>, H<sub>G5</sub>), 4.16-4.12 (m, 2H, H<sub>7a</sub>), 4.04 (dd, 2H,  $J_{3-4} = 9.5$  Hz,  $J_{3-2} = 5.2$  Hz, H<sub>3</sub>), 3.98-3.87 (m, 18H, H<sub>G10</sub>, H<sub>G2</sub>, H<sub>G6</sub>, H<sub>7b</sub>, H<sub>15</sub>), 3.81-3.54 (m, 46H, H<sub>4</sub>, H<sub>G4</sub>, H<sub>G8</sub>, H<sub>G12</sub>, H<sub>G3</sub>, H<sub>G7</sub>, H<sub>G11</sub>, H<sub>6</sub>, H<sub>11</sub>, H<sub>12</sub>, H<sub>13</sub>, H<sub>14</sub>), 1.51 (s, 18H, H<sub>tBu</sub>), 1.48 (s, 18H, H<sub>tBu</sub>).

HRMS (ESI):

| Molecular formula                                                                                  | Ion                         | Calcd. value (m/z) | Exp. value (m/z)       |
|----------------------------------------------------------------------------------------------------|-----------------------------|--------------------|------------------------|
| [C <sub>112</sub> H <sub>167</sub> N <sub>24</sub> NaO <sub>42</sub> ] <sup>+</sup>                | [M + H] <sup>+</sup>        | 2520.1670          | 2520.1633 <sup>i</sup> |
| [C <sub>112</sub> H <sub>166</sub> N <sub>24</sub> NaO <sub>42</sub> ] <sup>+</sup>                | [M + Na] <sup>+</sup>       | 2542.1489          | 2542.1438 <sup>i</sup> |
| [C <sub>112</sub> H <sub>165</sub> N <sub>24</sub> Na <sub>2</sub> O <sub>42</sub> ] <sup>+</sup>  | [M + 2Na - H] <sup>+</sup>  | 2564.1309          | 2564.1274 <sup>i</sup> |
| [C <sub>112</sub> H <sub>168</sub> N <sub>24</sub> O <sub>42</sub> ] <sup>2+</sup>                 | [M + 2H] <sup>2+</sup>      | 1260.5874          | 1260.5823              |
| [C <sub>112</sub> H <sub>167</sub> N <sub>24</sub> NaO <sub>42</sub> ] <sup>2+</sup>               | [M + Na + H] <sup>2+</sup>  | 1271.5783          | 1271.5763              |
| [C <sub>112</sub> H <sub>166</sub> N <sub>24</sub> Na <sub>2</sub> O <sub>42</sub> ] <sup>2+</sup> | [M + 2Na] <sup>2+</sup>     | 1282.5693          | 1282.5676              |
| [C <sub>112</sub> H <sub>169</sub> N <sub>24</sub> O <sub>42</sub> ] <sup>3+</sup>                 | [M + 3H] <sup>3+</sup>      | 840.7275           | 840.7244               |
| [C <sub>112</sub> H <sub>168</sub> N <sub>24</sub> NaO <sub>42</sub> ] <sup>3+</sup>               | [M + Na + 2H] <sup>3+</sup> | 848.0548           | 848.0525               |

|                                         |                      |          |          |
|-----------------------------------------|----------------------|----------|----------|
| $[C_{112}H_{167}N_{24}Na_2O_{42}]^{3+}$ | $[M + 2Na + H]^{3+}$ | 855.3821 | 855.3794 |
| $[C_{112}H_{166}N_{24}Na_3O_{42}]^{3+}$ | $[M + 3Na]^{3+}$     | 862.7095 | 862.7066 |

<sup>i</sup> found after deconvolution.

### Boc-deprotection

Compound **23** (14.5 mg, 5.7  $\mu$ mol, 1 eq.) was dissolved in a 9:1 mixture of dry  $CH_2Cl_2$  and TFA (570  $\mu$ L). The reaction was stirred at room temperature, under  $N_2$  for 1h 30 min. Upon completion ( $^1H$ -NMR monitoring,  $CD_3OD$ ) the mixture was concentrated *in vacuo* and co-evaporated with toluene three-times. Crude product was purified via semi-preparative HPLC (using the conditions reported below) to obtain the pure product **PM74** as bis-formate salt (4.3 mg, 35%; yellow foam).

HPLC: Flow: 10 mL/min; UV channels: 210 nm; 254 nm; A:  $H_2O + 0.1\%$   $HCO_2H$ , B:  $CH_3CN$ .  
Gradient: 0-2 min: 0% B, 2-27 min: 0 - 40% B;  $t_r$  (**PM74**) = 22.04 min

$^1H$ -NMR (400MHz,  $DMSO-d_6$ ):  $\delta$ (ppm)= 8.57 (brs, 2H, NH), 8.50 (s, 2H,  $H_{TC5}$ ), 8.44 (brs, 2H, FA), 8.14 (s, 2H,  $H_{TrCH}$ ), 8.09 (s, 2H,  $H_{TrCH'}$ ), 7.86 (s, 2H,  $H_{R2}$ ), 7.70 (brs, 6H, NH,  $NH_2$ ), 7.20 (s, 2H,  $H_{R5}$ ), 7.16 (s, 2H,  $H_{R10}$ ), 5.47 (brs, 2H, OH-3), 5.26 (brs, 2H, OH-4), 5.01 (s, 2H,  $H_1$ ), 4.87 (d, 2H,  $J_{2-3} = 4.8$  Hz,  $H_2$ ), 4.73 (brs, 2H, OH-6), 4.68-4.55 (m, 14H,  $H_8, H_{16}$ , OH-Peg), 4.51 (s, 4H,  $H_{10}$ ), 4.39 (s, 4H,  $H_9$ ), 4.28-4.20 (m, 12H,  $H_{G1}, H_{G9}, H_{G5}$ ), 4.05-3.98 (m, 2H,  $H_{7a}$ ), 3.91-3.80 (m, 18H,  $H_{7b}, H_3, H_5, H_{G6}, H_{G2}, H_{G10}$ ), 3.61-3.48 (m, 50H,  $H_6, H_4, H_{11}-H_{15}, H_{G4}, H_{G8}, H_{G12}, H_{G3}, H_{G7}, H_{G11}$ ).

HRMS (ESI):

| Molecular formula                      | Ion                  | Calcd. value (m/z) | Exp. value (m/z)       |
|----------------------------------------|----------------------|--------------------|------------------------|
| $[C_{92}H_{135}N_{24}O_{34}]^+$        | $[M + H]^+$          | 2119.9573          | 2119.9578 <sup>i</sup> |
| $[C_{92}H_{134}N_{24}NaO_{34}]^+$      | $[M + Na]^+$         | 2141.9392          | 2141.9407 <sup>i</sup> |
| $[C_{92}H_{133}N_{24}Na_2O_{34}]^+$    | $[M + 2Na - H]^+$    | 2163.9211          | 2163.9216 <sup>i</sup> |
| $[C_{92}H_{136}N_{24}O_{34}]^{2+}$     | $[M + 2H]^{2+}$      | 1060.4825          | 1060.4799              |
| $[C_{92}H_{135}N_{24}NaO_{34}]^{2+}$   | $[M + Na + H]^{2+}$  | 1071.4735          | 1071.4708              |
| $[C_{92}H_{134}N_{24}Na_2O_{34}]^{2+}$ | $[M + 2Na]^{2+}$     | 1082.4645          | 1082.4614              |
| $[C_{92}H_{137}N_{24}O_{34}]^{3+}$     | $[M + 3H]^{3+}$      | 707.3243           | 707.3232               |
| $[C_{92}H_{136}N_{24}NaO_{34}]^{3+}$   | $[M + 2H + Na]^{3+}$ | 714.6516           | 714.6503               |
| $[C_{92}H_{135}N_{24}Na_2O_{34}]^{3+}$ | $[M + 2Na + H]^{3+}$ | 721.9789           | 721.9775               |
| $[C_{90}H_{130}N_{20}Na_3O_{34}]^{3+}$ | $[M + 3Na]^{3+}$     | 729.3062           | 729.6389               |

<sup>i</sup> found after deconvolution.



Analytic HPLC: Flow: 1 mL/min; UV channel: 360 nm; A: H<sub>2</sub>O + 0.1% HCO<sub>2</sub>H, B: CH<sub>3</sub>CN + 0.1% HCO<sub>2</sub>H.  
Gradient: 0-2 min: 0% B, 2-16 min: 0 - 40% B; 16-19 min: 40 - 100% B; t<sub>r</sub> (PM74) = 14.5 min

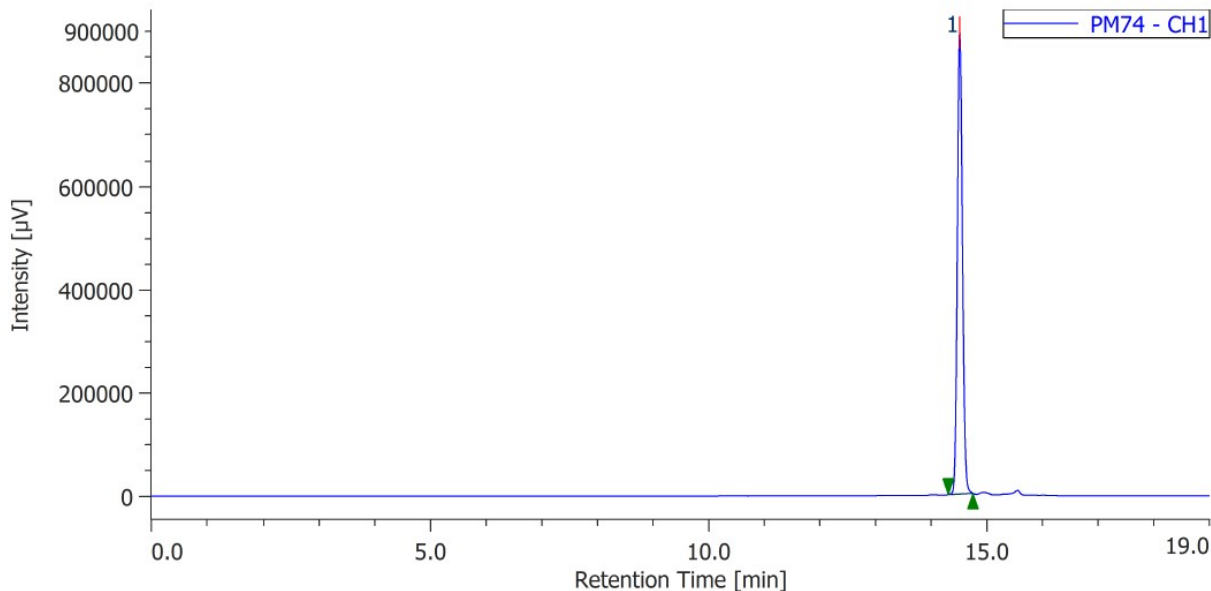

## Production of L-SIGN and DC-SIGN extracellular domain

---

### **L-SIGN and DC-SIGN constructs for SPR, ITC and X-ray crystallographic studies**

L-SIGN 3G-ECD (amino acids 78 to 399), L-SIGN CRD (amino acids 266 to 399) and DC-SIGN 3G-ECD (amino acids 66 to 404) were produced as previously described.<sup>[4,8,9]</sup> Constructs used were supplemented with 3 glycines “3G” residues on the N-terminus side with biomolecular tools, as an anchor for sorting process, described in the “Surface Plasmon Resonance analysis” supplementary part. This addition does not change the purification protocol and functional properties. The names “lectin 3G-ECD” and “lectin ECD” used hereafter refer to the same entity.

### **<sup>15</sup>N-labelled and non-labelled L-SIGN and DC-SIGN for NMR experiments**

The DNA fragment coding for the L-SIGN fragment (E262-E400) was inserted into a pET21a plasmid (synthesized by Genscript), amplified in *E. coli* DH5α cells, and subsequently transformed into *E. coli* BL21/DE3 cells. One single colony harbouring the expression construct was inoculated into 3 mL Luria Broth (LB) medium containing 100 μg·ml<sup>-1</sup> ampicillin and then, cultured with shaking for 6 h at 37 °C. For large scale expression of unlabelled protein, 1L of LB

(with antibiotic) was inoculated with the freshly grown culture. For the expression of  $^{15}\text{N}$ -labelled protein the cell pellet obtained with the small-scale culture (3ml LB) was transferred to M9 minimal medium containing 1 g/L  $^{15}\text{NH}_4\text{Cl}$  with ampicillin. Culture was performed at 37 °C until OD600 was 0.7, induced with 1 mM Isopropyl  $\beta$ -D-1-thio-galactopyranoside (IPTG) and then grown for another 3 h at 20 °C. The culture was harvested by centrifugation at 4500 rpm, and the final pellet was resuspended in lysis buffer (10 mM Tris-HCl pH 8) and sonicated at 4 °C. The protein in the form of inclusion bodies was recovered by ultracentrifugation at 30000 rpm for 1 h. The pellet was then solubilized in Tris-HCl 10 mM (pH 8) with 6 M guanidinium chloride and 0.01% (v/v)  $\beta$ -mercaptoethanol. The residual insoluble fraction was sedimented by ultracentrifugation at 40000 rpm  $\times$  2 h. The protein was refolded by dilution then, followed by dialysis. First, the protein sample was diluted 3-fold into buffered solution Tris-HCl 25mM, 1.5M NaCl, 25mM  $\text{CaCl}_2$ , pH 8. Then, subsequent dialysis against no guanidinium chloride (in 25 mM Tris-HCl pH 8, 1.5M NaCl, 25 mM  $\text{CaCl}_2$ ) was performed. The soluble fraction containing the folded protein was then purified through size exclusion chromatography in a HiLoad 16/60 Superdex 75 column eluting with 20 mM Tris-HCl, 150 mM NaCl, 5mM  $\text{CaCl}_2$ , 1mM EDTA, pH 8. Finally, fractions containing pure monomeric CRD were washed with 20 mM Tris-HCl, 150 mM NaCl, 5 mM  $\text{CaCl}_2$ , pH 8 to remove the EDTA, and concentrated using 10 MWCO membrane filters. Expression and purification of  $^{15}\text{N}$ -DC-SIGN (carbohydrate recognition domain) and the tetrameric extracellular domain of DC-SIGN were performed as previously described [12,13]

## Surface Plasmon Resonance (SPR) analysis

---

Surface Plasmon Resonance experiments were performed on Biacore T200 instrument at 25°C. Competition experiments were performed on surfaces functionalized with the Spike protein, using a CM4 sensorchip. The functionalization process of the sensorchip and compounds titrations used are described in Pollastri *et al* [4] : Flow cell 1 (Fc1) to 3 were activated with 60  $\mu\text{L}$  of a mixture of EDC-NHS (according to manufacturer). Fc1 was functionalized with 16.7  $\mu\text{L}$  of BSA at 20  $\mu\text{g}/\text{mL}$  in 10 mM NaOAc pH 4, at 5  $\mu\text{L}/\text{min}$ . Spike HexaPro was immobilized at the same flow rate on Fc2 and Fc3 at 20  $\mu\text{g}/\text{mL}$  in 100 mM NaOAc pH 5. Remaining activated groups were neutralized with 60  $\mu\text{L}$  of 1 M Ethanolamine pH 8.5. After functionalization, all surfaces were washed with 100  $\mu\text{L}$  of 10 mM HCl followed by 100  $\mu\text{L}$  of 50 mM NaOH/1M NaCl at 100  $\mu\text{L}/\text{min}$ . Finally, Fc1, 2 and 3 were functionalized respectively at 904, 1766, and 1913 RU.

Direct interaction assays were carried out on a CM3 sensorchip. DC-SIGN and L-SIGN surfaces were processed through a high-affinity biotin/streptavidin interaction. Lectins were biotinylated in N-terminus through a "sortagging process" : a depsi-biotin peptide with LPXTG end (X as any amino acid)

was linked to the N-terminus extremity of lectins complemented with 3 glycine residues. The sortase enzyme links these two ends and binds the biotin to each lectin protomer. Biotinylated lectins were then captured on surfaces previously functionalized with streptavidin. The position of the biotin on the CLR thus enables all the active sites to be oriented in the same direction at the surface, for optimal presentation to glycomimetic compounds. Streptavidin was functionalized of Fc1, Fc2 and Fc3, which were first activated with 60  $\mu\text{L}$  of a mixture of ECD-NHS (according to the manufacturer). Streptavidin was diluted at 100  $\mu\text{g}/\text{mL}$  in 10 mM NaOAc pH 4 and immobilized using 78  $\mu\text{L}$  at 5  $\mu\text{L}/\text{min}$ . Fc1 was used as a reference surface. Remaining activated groups were neutralized with 60  $\mu\text{L}$  of 1 M Ethanolamine pH 8.5. After functionalization, all surfaces were washed with 128  $\mu\text{L}$  of 10 mM HCl followed by 128  $\mu\text{L}$  of 50 mM NaOH/1M NaCl at 100  $\mu\text{L}/\text{min}$ . Finally, Fc1, 2 and 3 were functionalized respectively at 1322, 1393, and 1492 RU. Biotinylated DC-SIGN and L-SIGN were respectively diluted at 1.2  $\mu\text{g}/\text{mL}$  and 4  $\mu\text{g}/\text{mL}$  in HBS-P+ buffer and captured on Fc2 (for DC-SIGN) and Fc3 (for L-SIGN) surfaces using 100  $\mu\text{L}$  at 5  $\mu\text{L}/\text{min}$ . Non-specific binding was washed by injecting 48  $\mu\text{L}$  of 50 mM NaOH/1M NaCl NaOH at 100  $\mu\text{L}/\text{min}$ . Fc2 and Fc3 were functionalized at 1747 and 1774 RU. Surfaces functionality was tested by injections of BSA  $\alpha$ 1-3,  $\alpha$ 1-6 Mannotriose (Dextra, 14 atom spacer, product n°NGP1336) at 500 nM, with an association time of 250 sec and a dissociation time of 150 sec at a 30  $\mu\text{L}/\text{min}$  flow rate. The dimers were injected on surfaces with decreasing concentrations from 125  $\mu\text{M}$  to 1.9 nM, using a 1:2 dilution. Concentrations injected were adapted depending on the prediction of the apparent  $K_D$  obtained (see sensorgrams below). Flow rate was set at 20  $\mu\text{L}/\text{min}$  in 25 mM Tris pH 8, 150 mM NaCl, 4 mM  $\text{CaCl}_2$  supplemented with 0,05% Tween, with an association and dissociation time set to 200 and 150 seconds respectively. Surface regeneration was done between each injection for 10 seconds at 100  $\mu\text{L}$  with a 100-second stabilization period, using 50 mM glycine NaOH pH 12 0.15% Triton 25 mM EDTA.

**Figure S1: Sensorgrams of competition experiment**

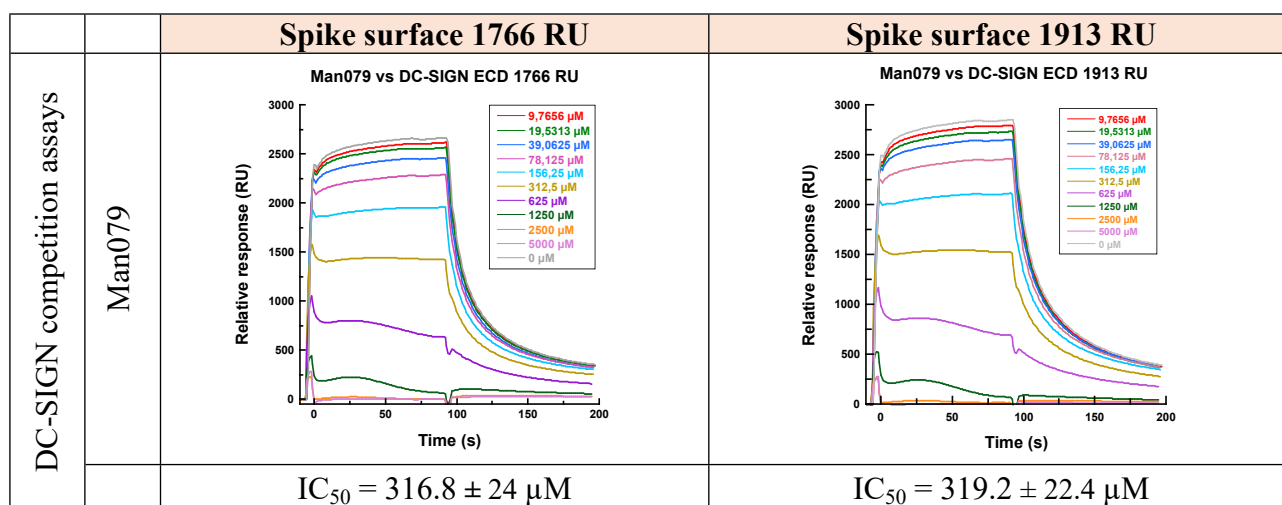

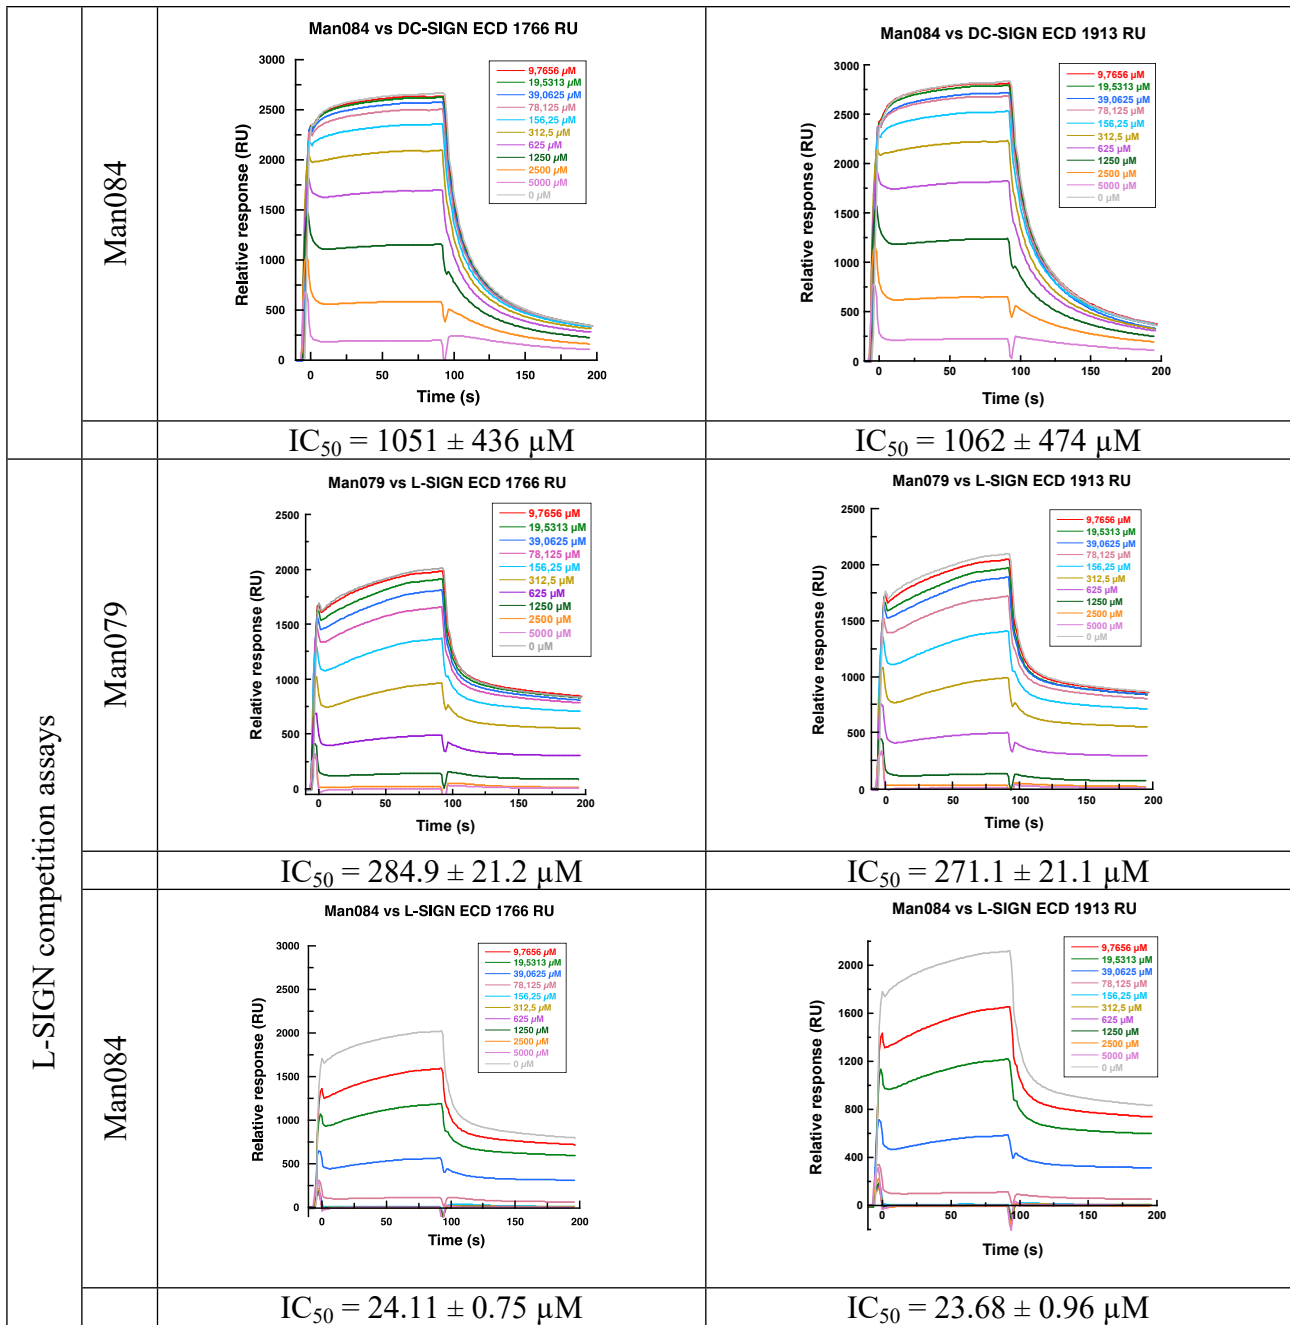

**Figure S2 : Sensorgrams of direct interaction experiments (duplicate)**

**First serie of measurements**

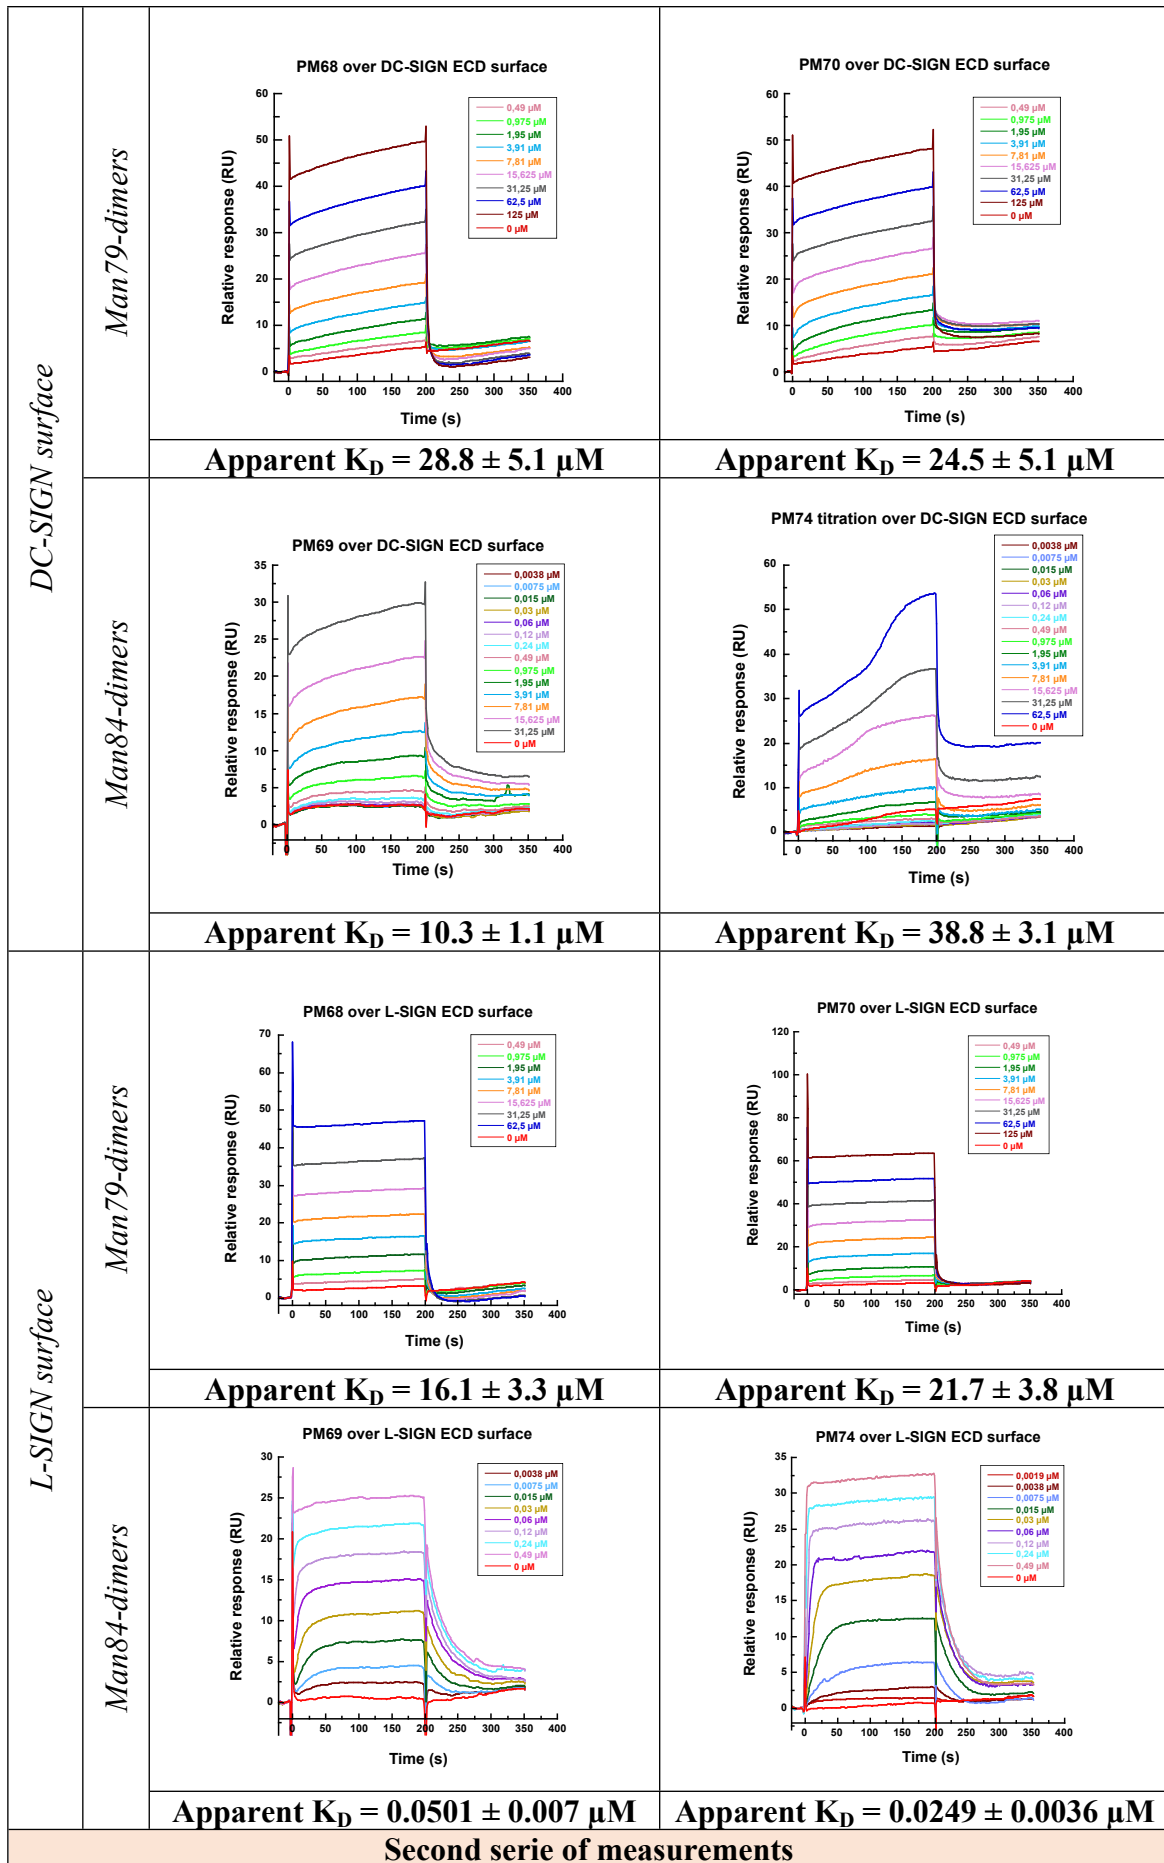

|                        |                     |                                                                 |                                                                  |
|------------------------|---------------------|-----------------------------------------------------------------|------------------------------------------------------------------|
| <i>DC-SIGN surface</i> | <i>Man79-dimers</i> | <p>PM68 over DC-SIGN ECD surface 2nd</p>                        | <p>PM70 over DC-SIGN ECD surface 2nd</p>                         |
|                        |                     | <b>Apparent <math>K_D = 38.5 \pm 6 \mu\text{M}</math></b>       | <b>Apparent <math>K_D = 31.7 \pm 6 \mu\text{M}</math></b>        |
|                        | <i>Man84-dimers</i> | <p>PM69 over DC-SIGN ECD surface 2nd</p>                        | <p>PM74 titration over DC-SIGN ECD surface 2nd</p>               |
|                        |                     | <b>Apparent <math>K_D = 9.31 \pm 0.77 \mu\text{M}</math></b>    | <b>Apparent <math>K_D = 20.9 \pm 1.5 \mu\text{M}</math></b>      |
| <i>L-SIGN surface</i>  | <i>Man79-dimers</i> | <p>PM68 over L-SIGN ECD surface 2nd</p>                         | <p>PM70 over L-SIGN ECD surface 2nd</p>                          |
|                        |                     | <b>Apparent <math>K_D = 44.4 \pm 7.6 \mu\text{M}</math></b>     | <b>Apparent <math>K_D = 44.1 \pm 4.8 \mu\text{M}</math></b>      |
|                        | <i>Man84-dimers</i> | <p>PM69 over L-SIGN ECD surface 2nd</p>                         | <p>PM74 on L-SIGN ECD surface 2nd</p>                            |
|                        |                     | <b>Apparent <math>K_D = 0.0537 \pm 0.012 \mu\text{M}</math></b> | <b>Apparent <math>K_D = 0.0247 \pm 0.0038 \mu\text{M}</math></b> |

## Isothermal titration calorimetry

Characterization assays by ITC were performed on MicroCal PEAQ-ITC (Malvern Panalytical) at 25°C. L-SIGN 3G-ECD and Man84 were respectively diluted at 172  $\mu\text{M}$  and 2 mM with 25 mM Tris pH 8, 150 mM NaCl, 4 mM  $\text{CaCl}_2$  buffer. L-SIGN was injected on the Sample Cell, equilibrated 3 times with buffer 25 mM Tris pH 8, 150 mM NaCl, 4 mM  $\text{CaCl}_2$ . 40  $\mu\text{L}$  of Man84 sample were loaded into the syringe. 20 injections of 2  $\mu\text{L}$  were performed into the Sample cell (initial injection of 0.5  $\mu\text{L}$ , deleted for analysis), each one at 0,5  $\mu\text{L/s}$  with 180 seconds between two injections. All the parameters were determined via the MicroCal PEAQ-ITC Analysis Software.

**Figure S3**

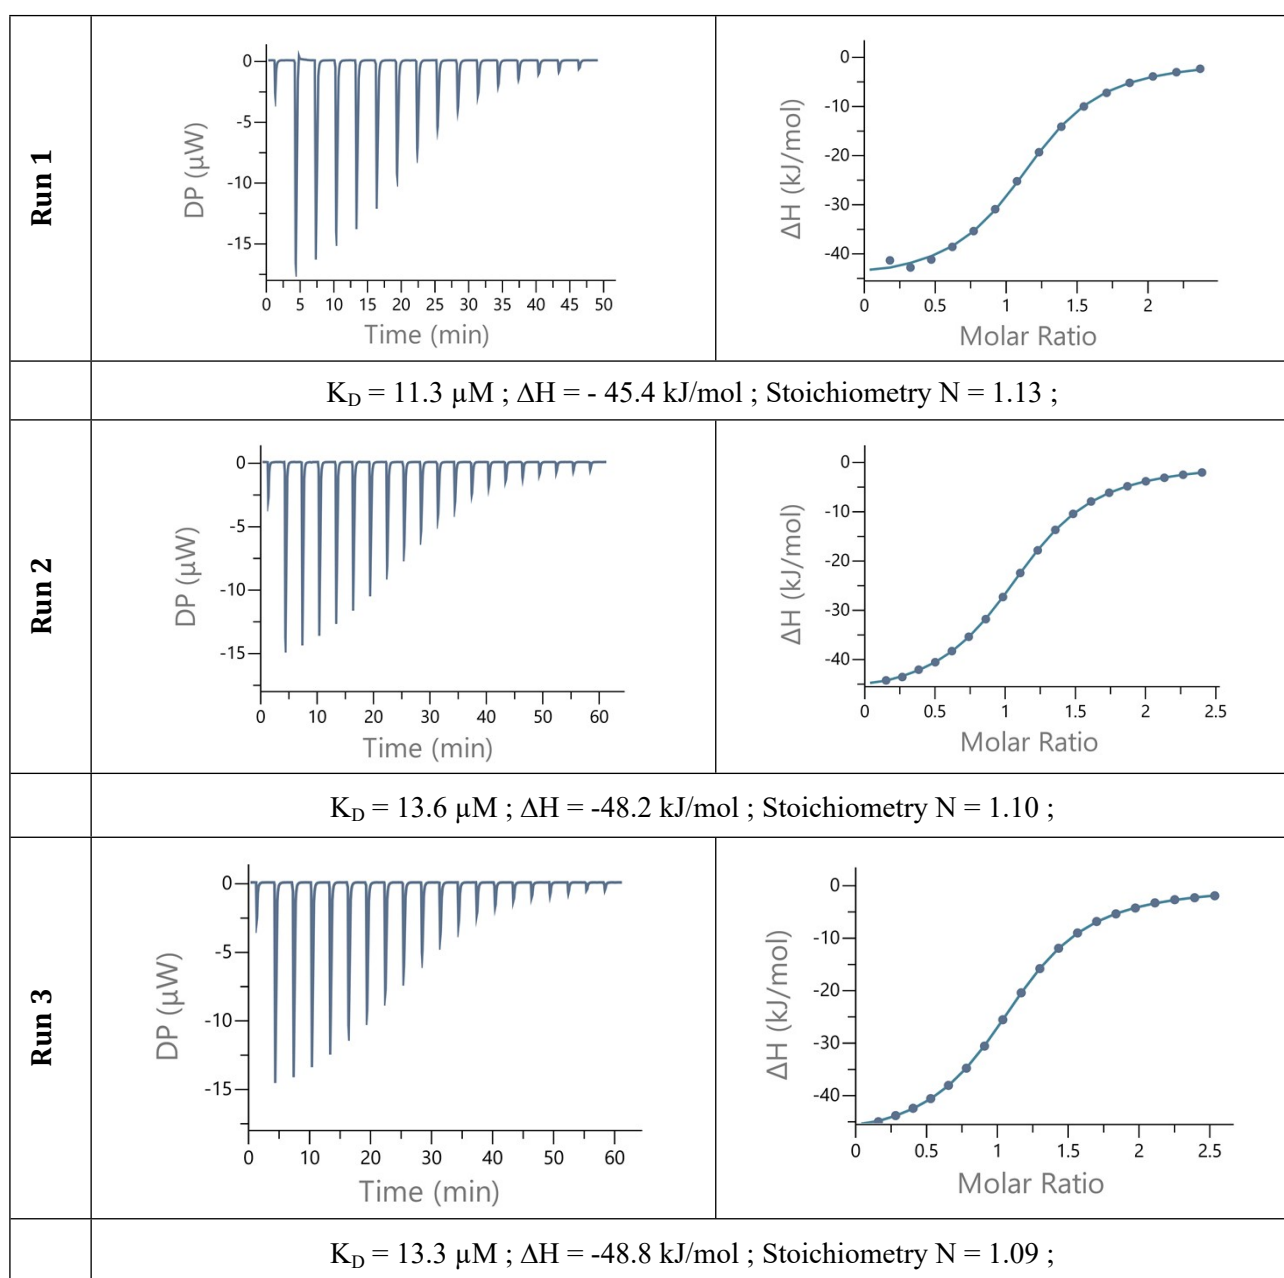

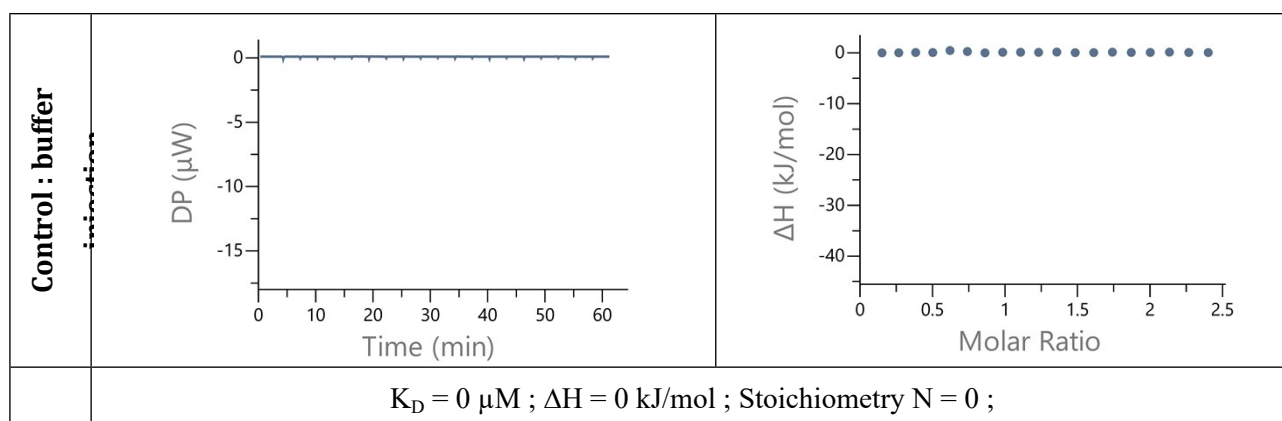

*Thermodynamic parameters:*

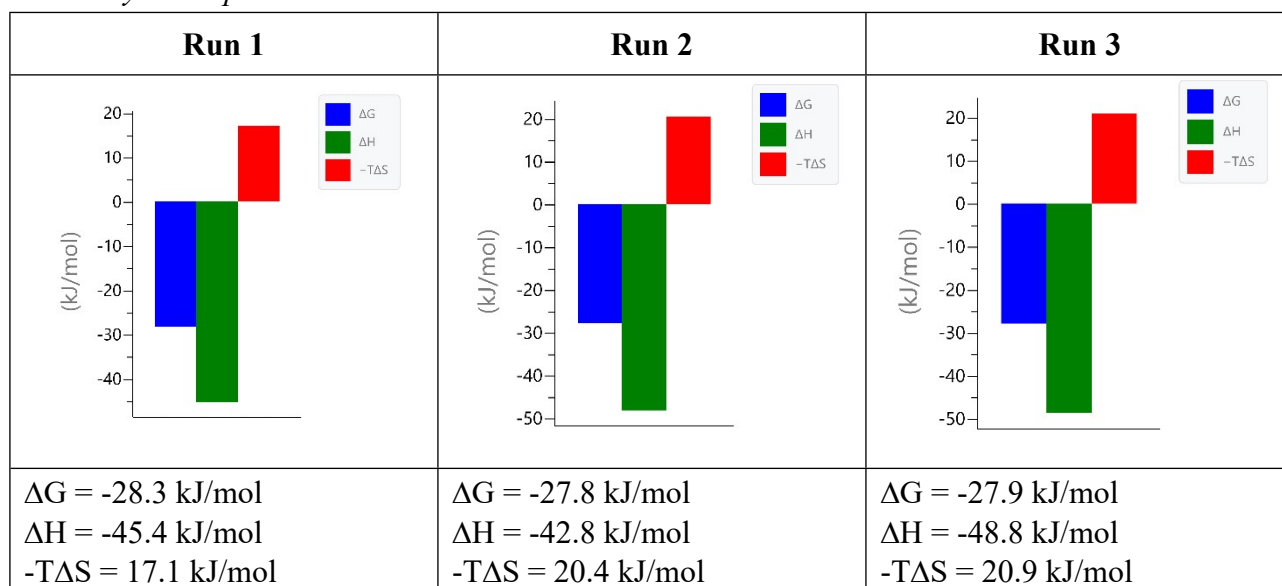

## NMR Interaction Experiments

**General information.** 500  $\mu\text{L}$  samples were prepared and precision NMR tubes with 5 mm outer diameter (New Era Enterprises, Vineland, USA) were employed.  $^1\text{H}$ -NMR resonances of **Man84** were assigned through standard 2D-TOCSY (60 and 90 ms mixing times), 2D-NOESY (400 ms mixing time), and  $^1\text{H},^{13}\text{C}$ -HSQC experiments at 298K on a 1 mM sample in  $\text{D}_2\text{O}$ . NMR experiments were acquired on a Bruker 800 MHz spectrometer.

**Chemical Shift Perturbation (CSP) Analysis.** For DC-SIGN, experiments were acquired at 308K on a sample containing 40  $\mu\text{M}$   $^{15}\text{N}$ -labelled protein in buffered (25 mM Tris- $\text{d}_{11}$ , 150 mM NaCl, 4 mM  $\text{CaCl}_2$ , 2 mM DTT- $\text{d}_{10}$ , pH 8)  $\text{H}_2\text{O}/\text{D}_2\text{O}$  9:1. In the case of L-SIGN, experiments were acquired at 301K on a sample of 29  $\mu\text{M}$  of  $^{15}\text{N}$ -labelled protein in buffered (20 mM Tris-HCl, 150 mM NaCl, 5 mM  $\text{CaCl}_2$ , pH 8)  $\text{H}_2\text{O}/\text{D}_2\text{O}$  9:1.  $^1\text{H},^{15}\text{N}$ -HSQC experiments with 128 (T1) x 1536 (T2) complex data points in  $^{15}\text{N}$  and  $^1\text{H}$  dimensions, respectively were acquired either in the absence or in the presence of the ligand. 10 and 100 equivalents of **Man84** were titrated into protein samples of L-SIGN and DC-SIGN, respectively. Backbone resonance assignments deposited in the Biological Magnetic Resonance Data Bank (BMRB)



27854 and 25046, for DC-SIGN and L-SIGN, respectively) were employed for data analysis. Average chemical shift perturbation (CSP) of the protein-backbone NH groups was analysed using CcpNmr Analysis software and calculated using the formula:  $\Delta\delta$  (ppm) =  $[(\Delta\delta H^2 + (0.14 \cdot \Delta\delta N)^2)/2]^{1/2}$ .

**Transferred NOESY experiments.** Samples contained: for DC-SIGN, 11 $\mu$ M of the tetrameric extracellular domain and 750  $\mu$ M of **Man84** (17 equivalents with respect to the number of carbohydrate binding sites), and for L-SIGN, 40  $\mu$ M of the monomeric CRD (non-labelled) and 1.6mM of **Man84** (protein:ligand ratio 1:10), in buffered D<sub>2</sub>O (L-SIGN: 20 mM Tris-d11, 150 mM NaCl, 5 mM CaCl<sub>2</sub>, pH 8; DC-SIGN: 25 mM Tris-d11, 150 mM NaCl, 4 mM CaCl<sub>2</sub>, 2 mM DTT-d10). 2D-NOESY experiments were recorded on a Bruker AVANCE 2 800 MHz spectrometer equipped with cryoprobe at 298K. The experiments were acquired with 2048x128 data points with mixing times of 50ms for the sample with DC-SIGN and 100ms for the sample with L-SIGN.

## Crystallogenes and crystal structure determination

---

Crystals were obtained for reservoir conditions with 0.18M tri-ammonium citrate and 20% (w/v) PEG 3350, with a 2:1 ratio of protein/reservoir. The processing of these data was carried out with the A chain of the PDB 1SL6 architecture (without ligand) as a model and the Man84 molecule added later. Data collection was performed at id30A-1 beamline (MASSIF-1), ESRF Grenoble, 900 images were collected at 100°K, with an oscillation range of 0.2°, an exposure time of 0.05s per image, and a wavelength of 0.965459 Å.

Data sets were processed and using the programs XDS by playing on “Strong\_Pixel” parameter to filter the weaker diffraction spots. This parameter was increased by a factor of 2 at each assay of indexation, until a good quality of feet (<10) was obtained for a space group different from space group 1 (P1). Such results were obtained with STRONG\_PIXEL=24 (default was 6) resulting in CC(1/2)>50% until resolution of 1.8 Å. Space group was confirmed using POINTLESS and turns out to be space group 4 (P2<sub>1</sub>). Finally, reflections were scaled using XSCALE. Statistics of data processing are summarized in Table 1. Matthew’s coefficient was calculated to 1 using the program MATTHEWS\_COEF from the CCP4 suite. Phasing was performed by molecular replacement with a known structure of DC-SIGN CRD (a chain of pdb code: 1SL6) depleted of the ligand and water molecules. The best solution resulting from molecular replacement was used as the starting model for structure refinement. The structure refinement was performed by cycling between manual building using the program COOT and energy minimization with the program REFMAC from the CCP4 package. Geometry of the structure was verified using Procheck program with check module of the CCP4 program suite. Finally, the structure was verified using Procheck program with CHECK module of the CCP4 program suite. Data processing and refinement statistics are described in Table 2. The crystal structure of DC-SIGN CRD/Man84 has been deposited in Protein Data Bank under PDB code 8RCY.

| Data collection statistics          |                                                                              |
|-------------------------------------|------------------------------------------------------------------------------|
| Wavelength (Å)                      | 0.965459                                                                     |
| Space group                         | P12 <sub>1</sub> 1(4)                                                        |
| Unit cell parameters (Å)            | a=33.43, b=48.89, c=35.67,<br>$\alpha=90.0$ , $\beta=103.53$ , $\gamma=90.0$ |
| Resolution (Å)                      | 48.88-1.8(1.91-1.8)                                                          |
| Unique reflections                  | 10206 (1441)                                                                 |
| Completeness (%)                    | 97.6 (87.1)                                                                  |
| I/ $\sigma$                         | 9.09 (1.52)                                                                  |
| CC (1/2) (%)                        | 99.6 (74.4)                                                                  |
| Structure refinement statistics     |                                                                              |
| Resolution (Å)                      | 34.68-1.8                                                                    |
| Refinement factors                  |                                                                              |
| Used reflections/free (%)           | 9695/485                                                                     |
| $R_{\text{cryst}}^c$                | 0.1626                                                                       |
| $R_{\text{free}}^c$                 | 0.2125                                                                       |
| rmsd from ideality                  |                                                                              |
| Bond angles (deg)                   | 1.5080                                                                       |
| Bond lengths (Å)                    | 0.0076                                                                       |
| Ramachandran plot (%)               |                                                                              |
| Most favoured regions               | 95.87                                                                        |
| Additional allowed regions          | 3.3                                                                          |
| Disallowed regions                  | 0.83                                                                         |
| Average B-factors (Å <sup>2</sup> ) | 28.0                                                                         |

**Table S1: L-SIGN CRD/Man084 complex data collection and structure refinement statistics.**

## Production of SARS-CoV-2 and EBOV-pseudotyped rVSV-luc and trans-infection assays

---

Trans-infection assays with **PM74**, **PM66**, **PM71** and mannan were performed by using pseudoviruses (PSV) based in a recombinant vesicular stomatitis virus-luciferase (rVSV-luc) system and a reference strain of SARS-CoV-2 and EBOV-pseudotyped. rVSV-luc was produced following previously published protocols.<sup>[10,11]</sup> First, BHK-21 cells were transfected using Lipofectamine 3000 (Fisher Scientific) to express Ebola virus Makona Glycoprotein (EBOV-GP, GenBank KM233102.1) or Spike protein of SARS-CoV-2 (Wu-hu-1 D614G). On the next day, transfected cells were inoculated with a replication-deficient rVSV-luc pseudotype (MOI: 3) (Kerafast, Boston, MA). After 1 h incubation at 37°C, cells were washed three times with PBS and then DMEM supplemented with 5% heat-inactivated FBS, 25 µg/mL gentamycin and 2 mM L-glutamine were added. PSV were collected 24 h post-inoculation, clarified from cellular debris by centrifugation and stored at -80°C. Luciferase activity was determined by luciferase assay (Steady-Glo Luciferase Assay System, Promega).

PSV were normalized for infectivity to a multiplicity of infection of 0.5 and the inhibitory effect of the glycomimetic compounds: **PM74**, **PM66** and **PM71** were evaluated in trans-infection experiments using Jurkat cells expressing DC-SIGN and L-SIGN and Vero E6 cells. Jurkat DC-SIGN and Jurkat L-SIGN cells were first pre-incubated 20 min with the corresponding concentration of the compounds before being challenged with SARS-CoV-2 and EBOV-rVSV-luc. **PM74**, **PM66** and **PM71** were tested at 2 different concentrations: 5 µM and 500 nM, and mannan was tested at 25µg/mL. Cells were then incubated with the SARS-CoV-2 and EBOV-rVSV-luc during 2 h at room temperature with rotation. Cells were then centrifuged at 1200 rpm for 5 minutes and washed three times with PBS supplemented with 0.5 % BSA and 1 mM CaCl<sub>2</sub>. Cells were then resuspended in RPMI medium and co-cultivate with adherent VeroE6 cells. After 24 h, the supernatant was removed and monolayer of VeroE6 was washed with PBS three times. Cells were then lysed and assayed for luciferase expression (Glomax Navigator, Promega).

To calculate PM-74 50% inhibitory concentration (IC<sub>50</sub>) for SARS-CoV-2 trans-infection DC-SIGN or L-SIGN Jurkat cells were tested by triplicates in a range of concentrations from 100 µM to 0.01 nM. IC<sub>50</sub> and 95% confident interval was calculated by Graph Pad Prism V8. See Figure S4 below.

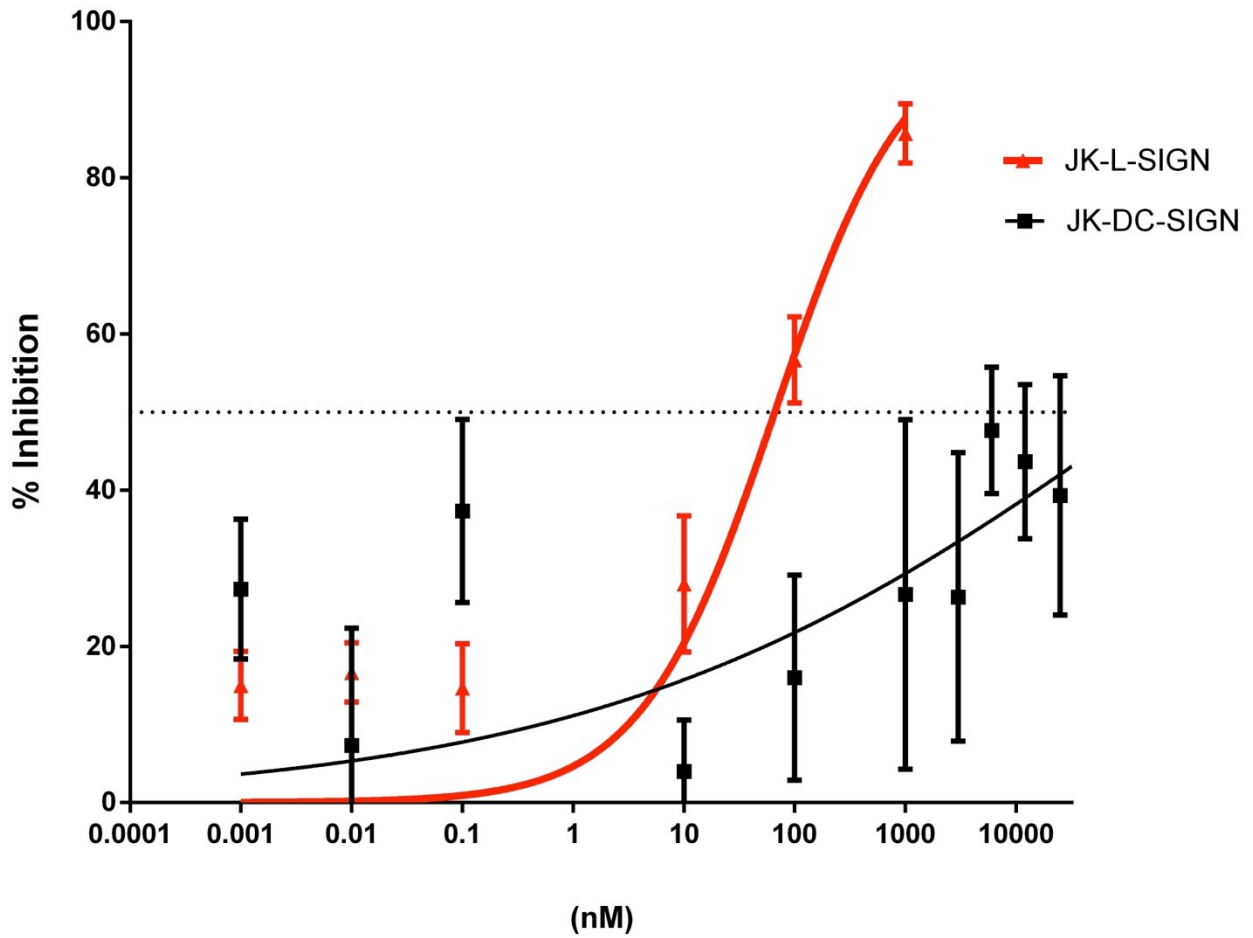

**Figure S4:** PM74 inhibition of DC-SIGN and L-SIGN-mediated trans-infection of SARS-CoV-2. DC-SIGN or L-SIGN expressing Jurkat cells were incubated with SARS-CoV-2 pseudoviruses (SARS-CoV-2\_S-VSV) in the presence of PM74 and after extensive washing cells were incubated onto susceptible Vero E6 cells. Mean values  $\pm$  SEM are represented.

## References

---

- [1] W. C. Still, M. Kahn, A. Mitra, *Journal of Organic Chemistry* **1978**, *43*, 2923–2925.
- [2] K. Feichtinger, C. Zapf, H. L. Sings, M. Goodman, *J Org Chem* **1998**, *63*, 3804–3805.
- [3] K. Feichtinger, H. L. Sings, T. J. Baker, K. Matthews, M. Goodman, *J Org Chem* **1998**, *63*, 8432–8439.
- [4] S. Pollastri, C. Delaunay, M. Thépaut, F. Fieschi, A. Bernardi, *Chemical Communications* **2022**, *58*, 5136–5139.
- [5] C. S. Eubanks, J. E. Forte, G. J. Kapral, A. E. Hargrove, *J Am Chem Soc* **2017**, *139*, 409–416.
- [6] F. Piron, C. Oprea, C. Cismaş, A. Terec, J. Roncali, I. Grosu, *Synthesis (Stuttg)* **2010**, *2010*, 1639–1644.
- [7] F. Pertici, N. Varga, A. van Duijn, M. Rey-Carrizo, A. Bernardi, R. J. Pieters, *Beilstein Journal of Organic Chemistry* **2013**, *9*, 215–222.
- [8] S. Achilli, J. T. Monteiro, S. Serna, S. Mayer-Lambertz, M. Thépaut, A. Le Roy, C. Ebel, N.-C. Reichardt, B. Lepenies, F. Fieschi, C. Vivès, *Int J Mol Sci* **2020**, *21*, 5290.
- [9] G. Tabarani, M. Thépaut, D. Stroebel, C. Ebel, C. Vivès, P. Vachette, D. Durand, F. Fieschi, *Journal of Biological Chemistry* **2009**, *284*, 21229–21240.
- [10] M. A. Whitt, *J Virol Methods* **2010**, *169*, 365–374.
- [11] M. Thépaut, J. Luczkowiak, C. Vivès, N. Labiod, I. Bally, F. Lasala, Y. Grimoire, D. Fenel, S. Sattin, N. Thielens, G. Schoehn, A. Bernardi, R. Delgado, F. Fieschi, *PLoS Pathog* **2021**, *17*, DOI 10.1371/journal.ppat.1009576.
- [12] P. Valverde, S. Delgado, J. D. Martínez, J.-B. Vendeville, J. Malassis, B. Linclau, N.-C. Reichardt, F. J. Cañada, J. Jiménez-Barbero and A. Ardá, *ACS Chem. Biol.*, 2019, **14**, 1660–1671.
- [13] J. D. Martínez, P. Valverde, S. Delgado, C. Romanò, B. Linclau, N. C. Reichardt, S. Oscarson, A. Ardá, J. Jiménez-Barbero and F. J. Cañada, *Molecules*, 2019, **24**, 2337.

## NMR spectra of ligands

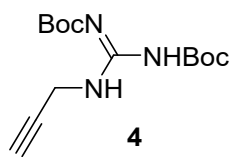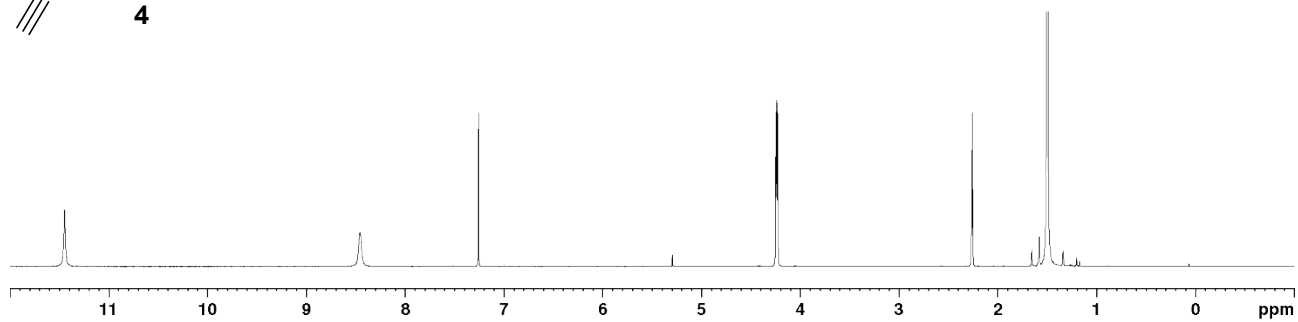

<sup>1</sup>H-NMR spectrum in CDCl<sub>3</sub> (400 MHz)

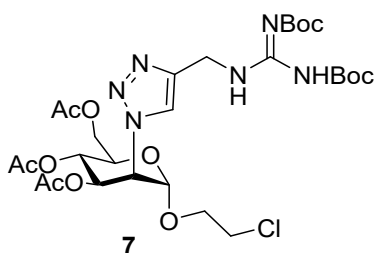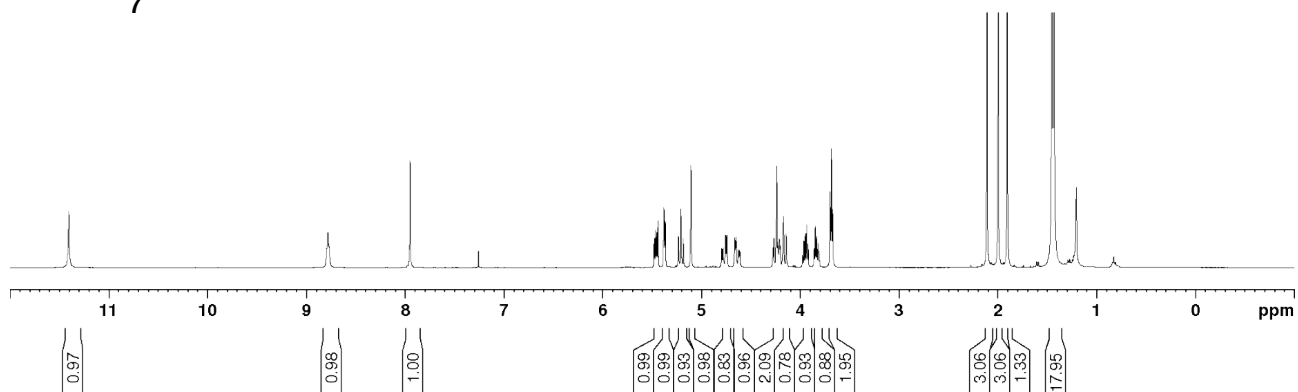

<sup>1</sup>H-NMR spectrum in CDCl<sub>3</sub> (400 MHz)

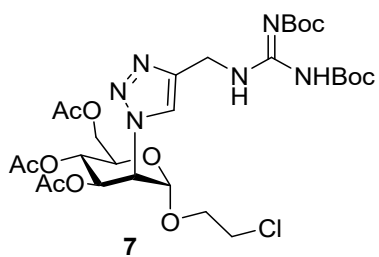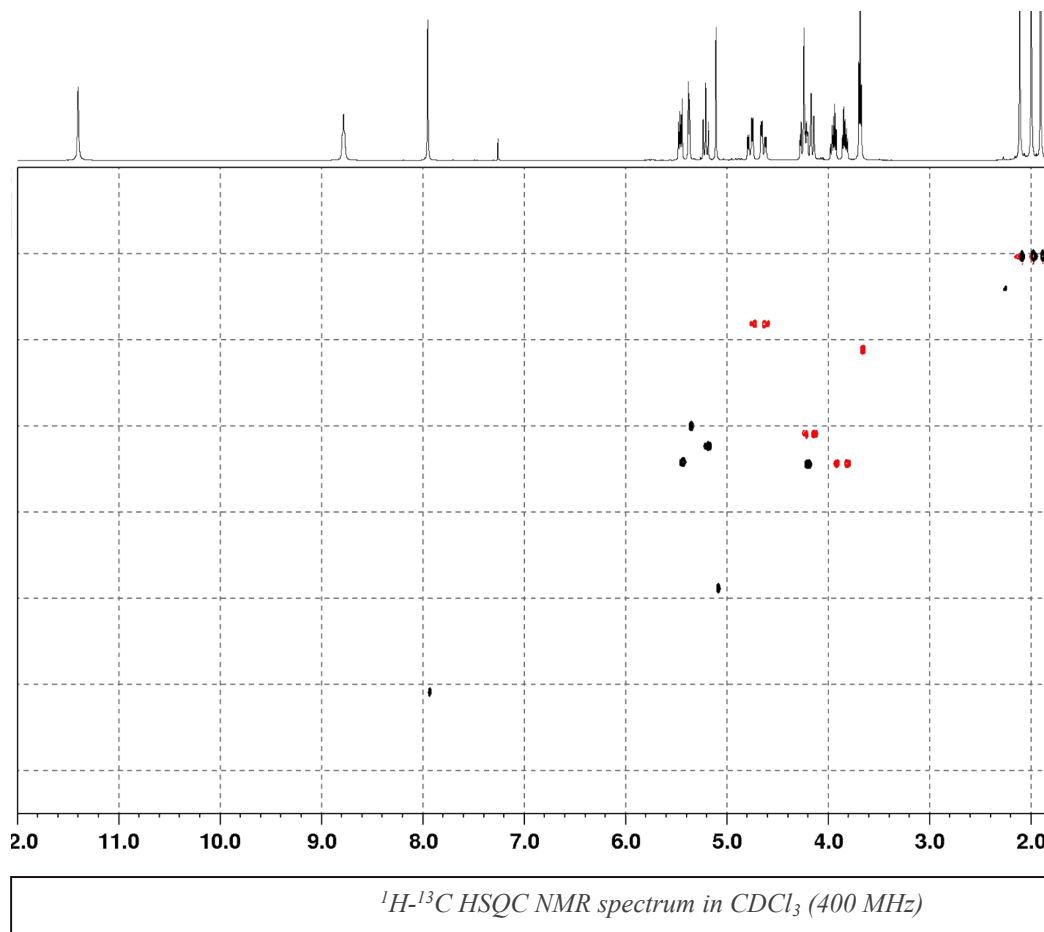

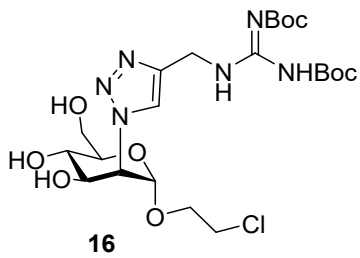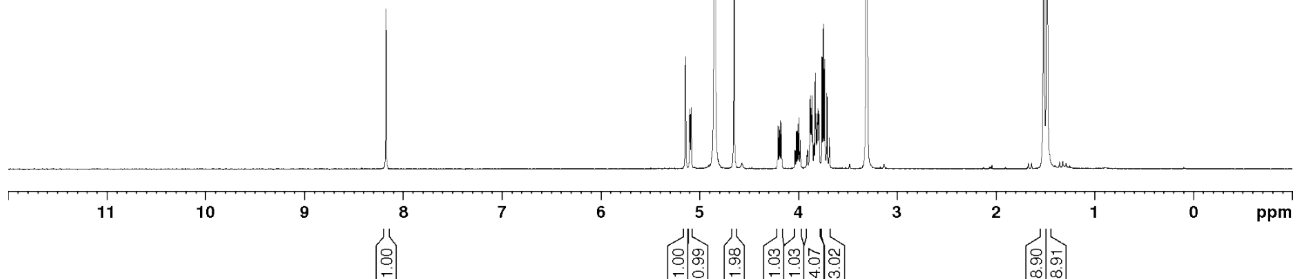

$^1\text{H-NMR}$  spectrum in  $\text{CD}_3\text{OD}$  (400 MHz)

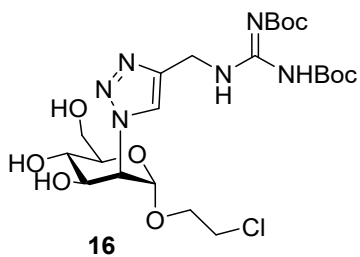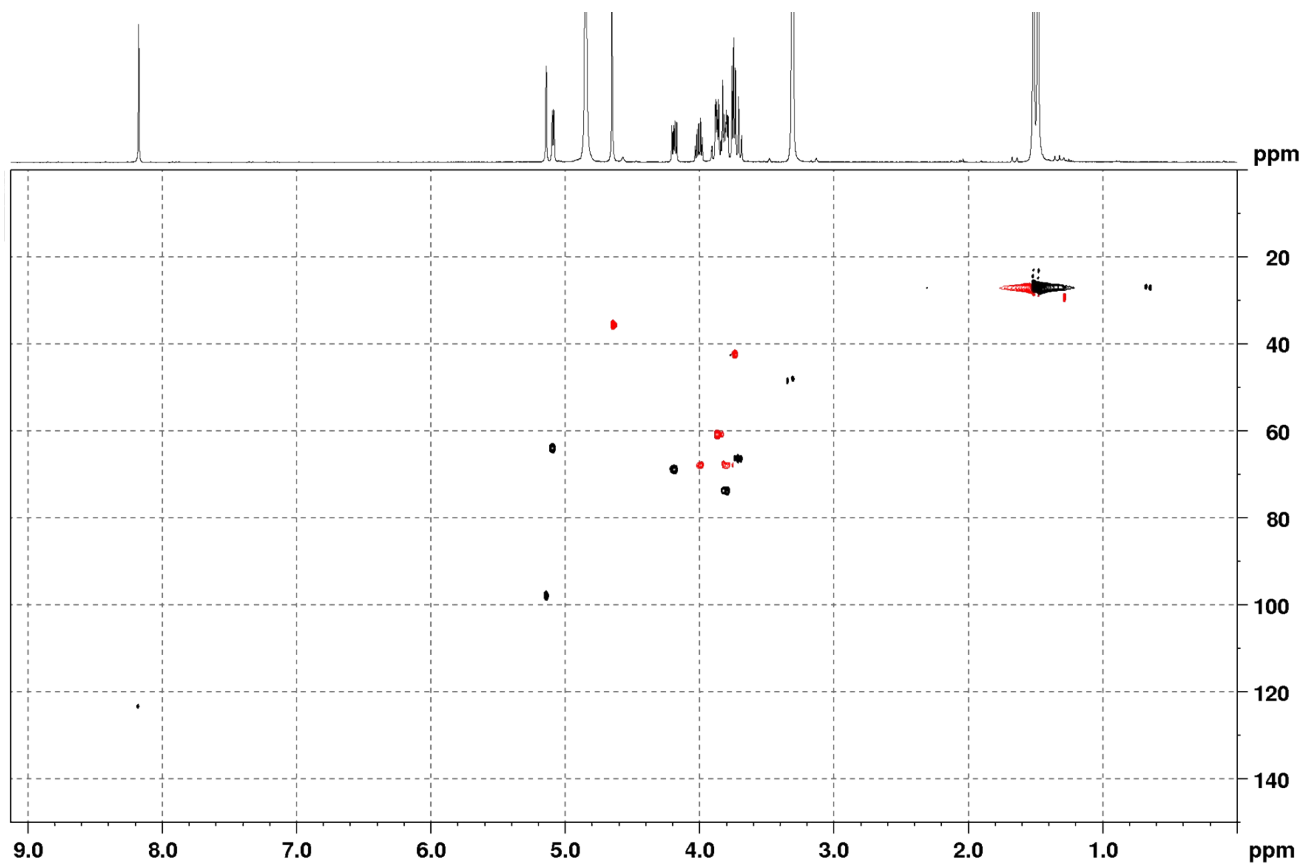

$^1\text{H-}^{13}\text{C}$  HSQC NMR spectrum in  $\text{CD}_3\text{OD}$  (400 MHz)



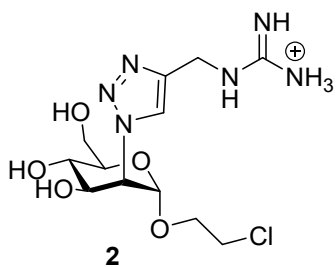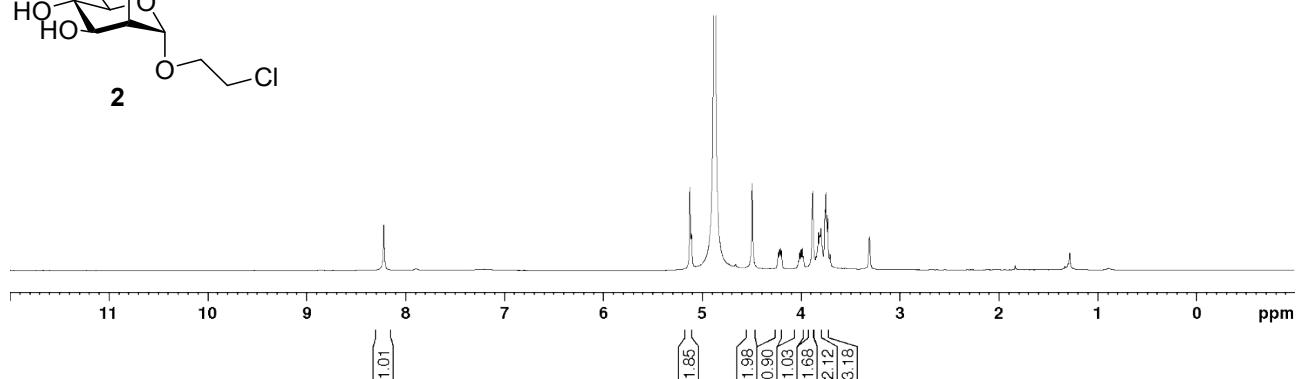

<sup>1</sup>H-NMR spectrum in CD<sub>3</sub>OD (400 MHz)

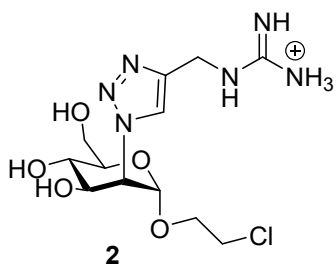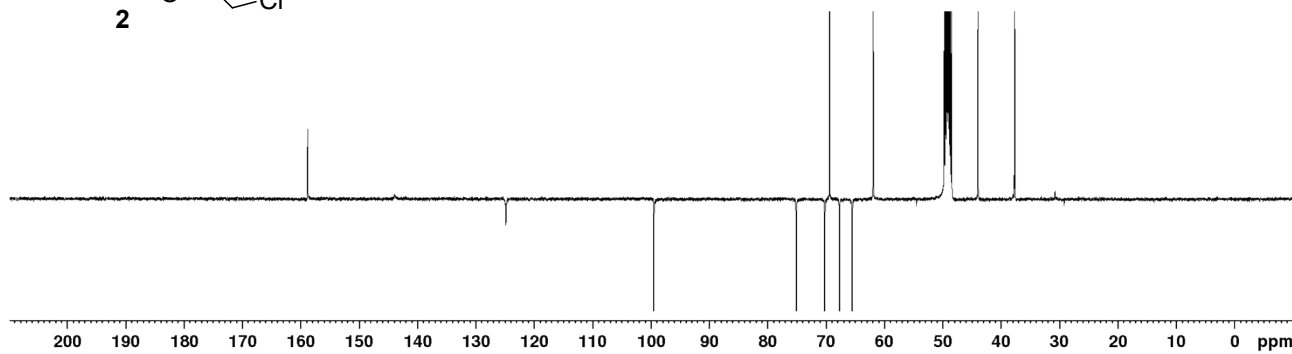

<sup>13</sup>C-NMR spectrum in CD<sub>3</sub>OD (400 MHz)

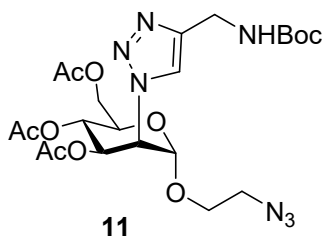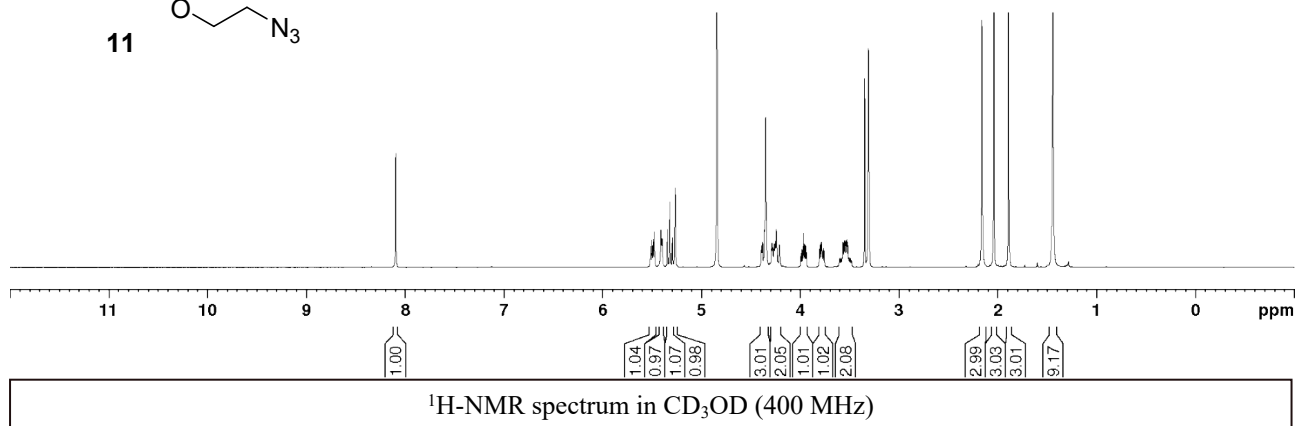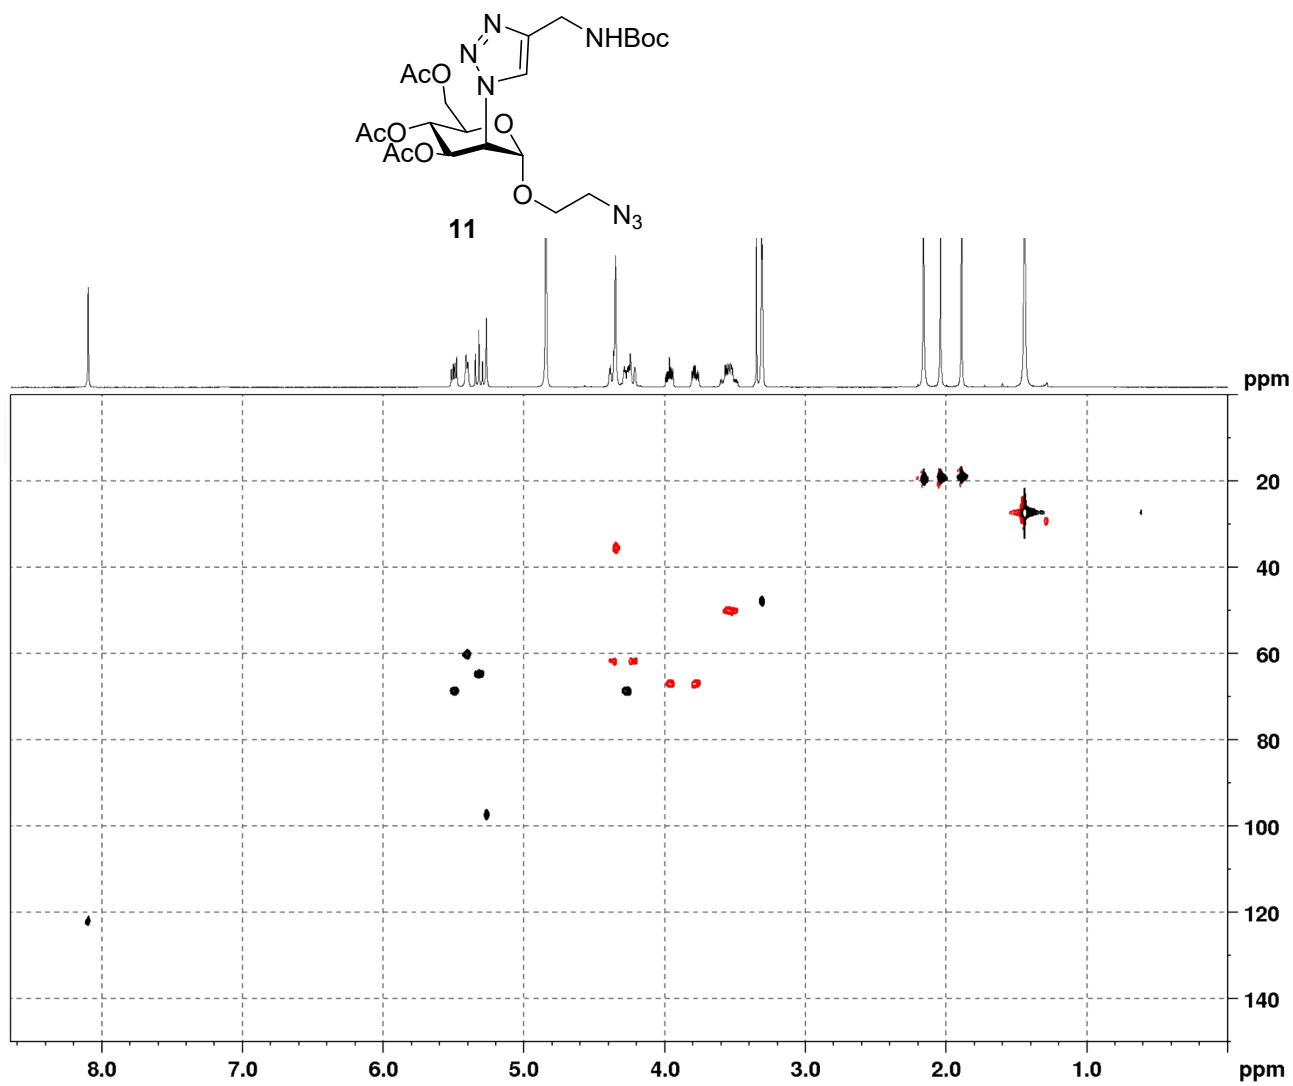

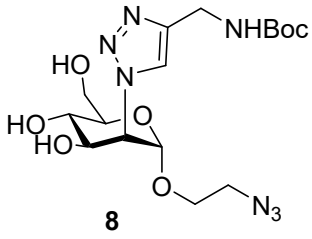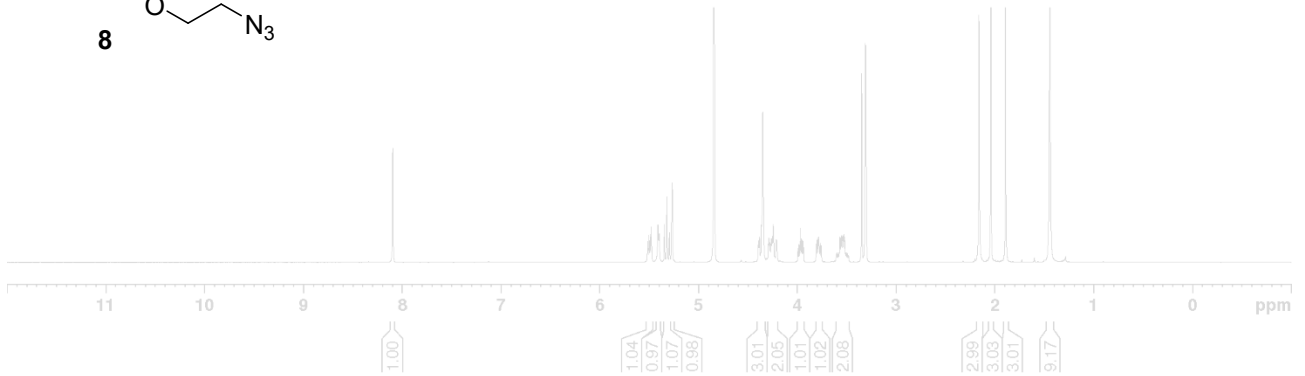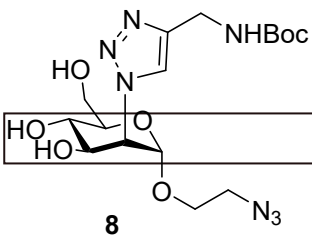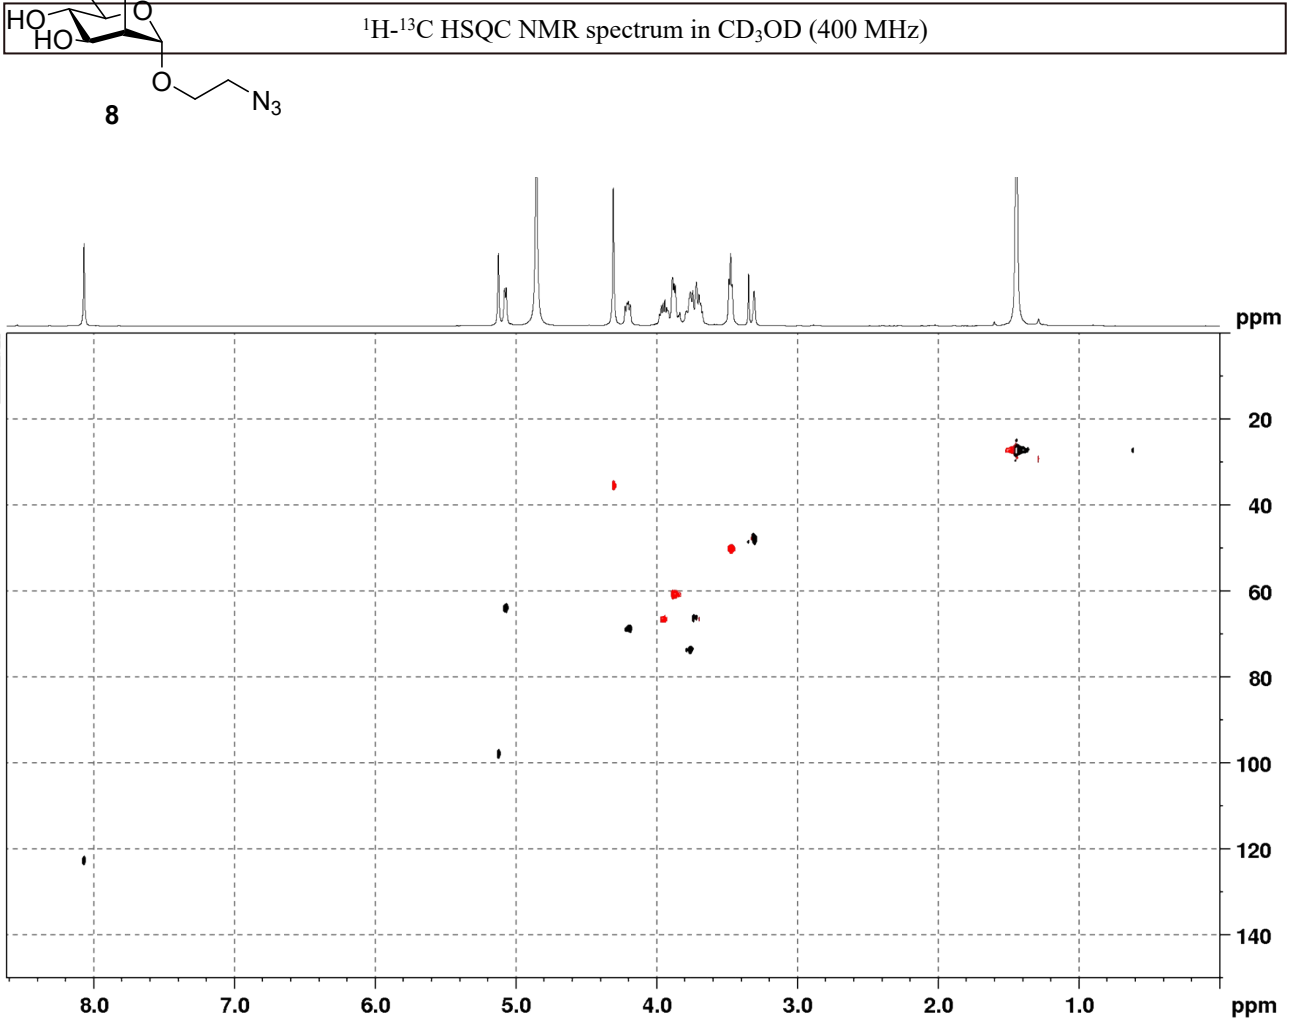

<sup>1</sup>H-<sup>13</sup>C HSQC NMR spectrum in CD<sub>3</sub>OD (400 MHz)

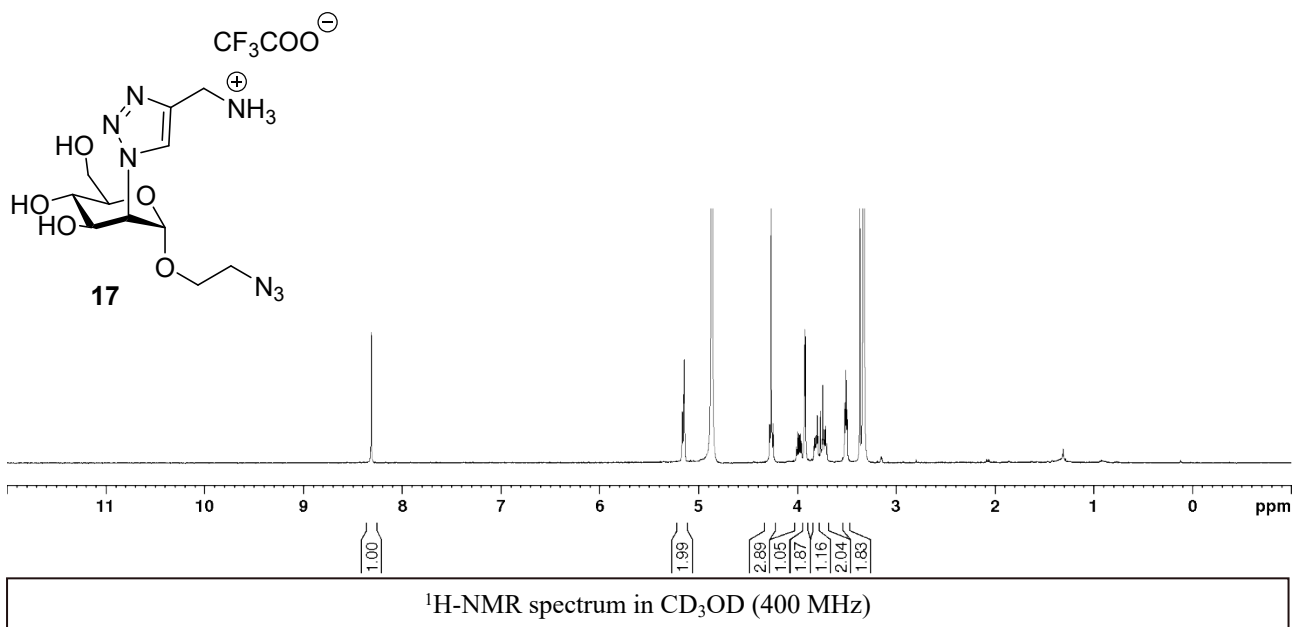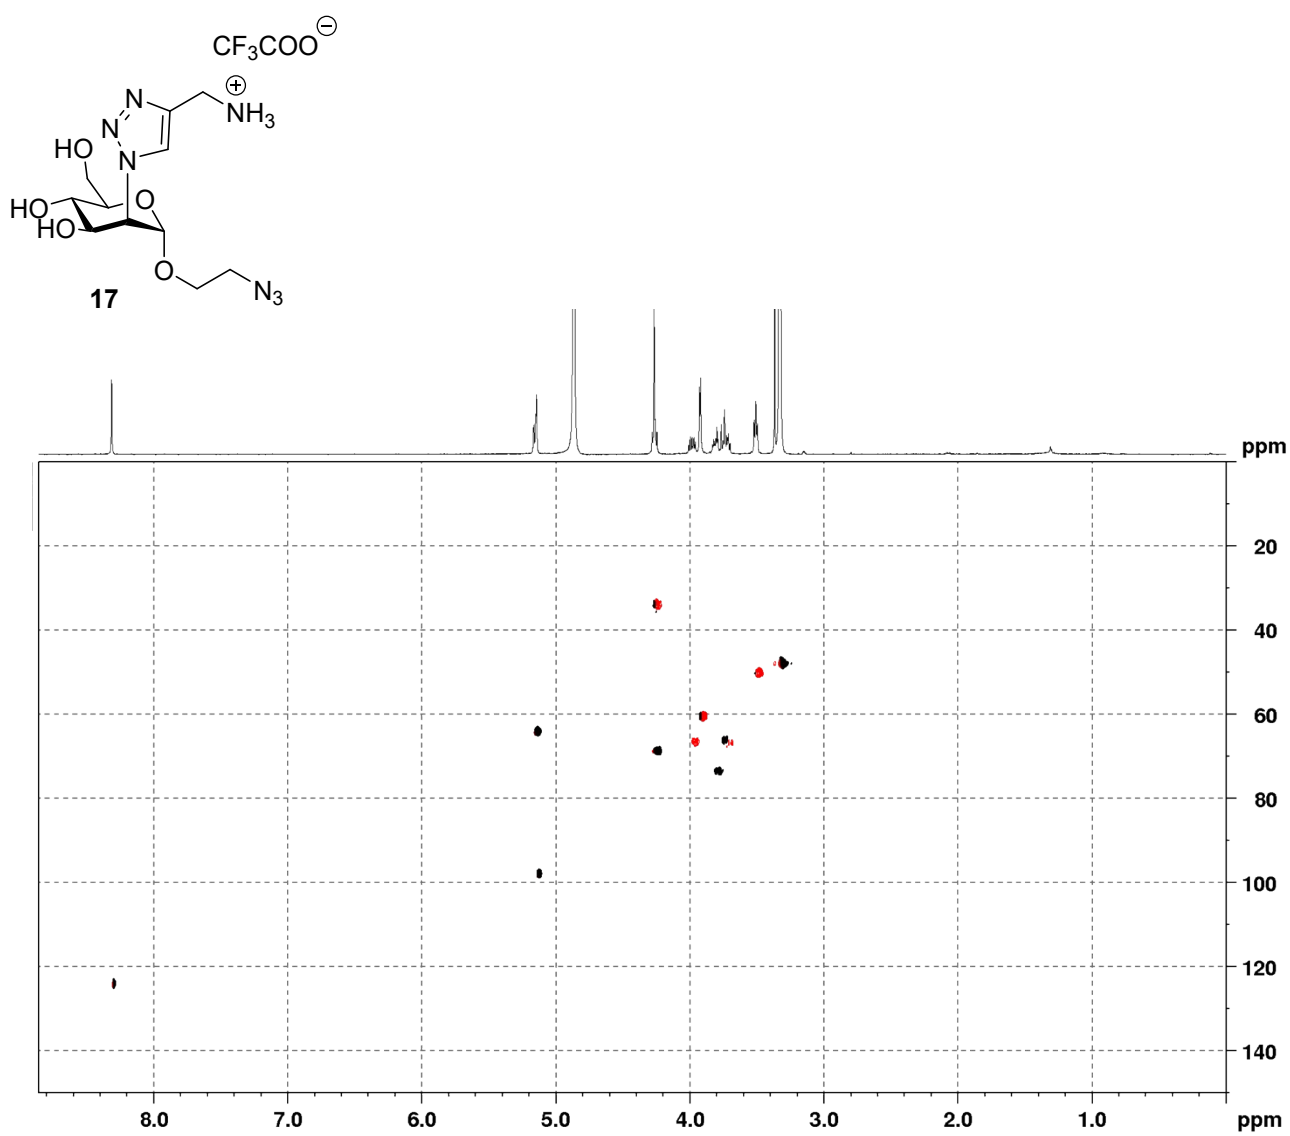

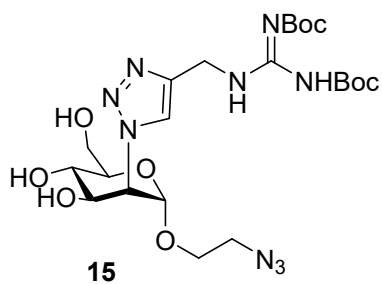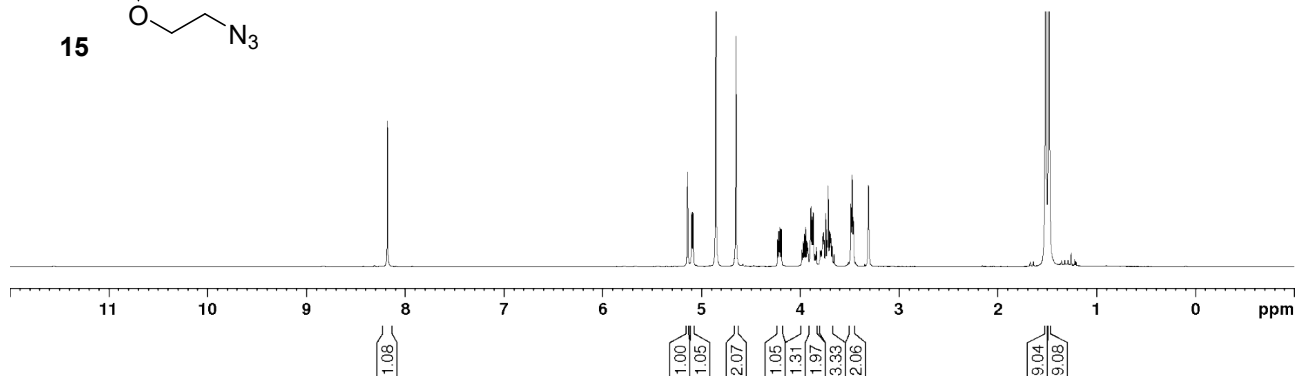

<sup>1</sup>H-NMR spectrum in CD<sub>3</sub>OD (400 MHz)

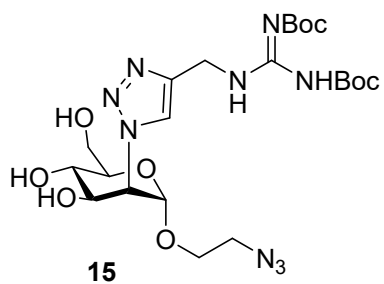

<sup>1</sup>H-<sup>13</sup>C HSQC NMR spectrum in CD<sub>3</sub>OD (400 MHz)

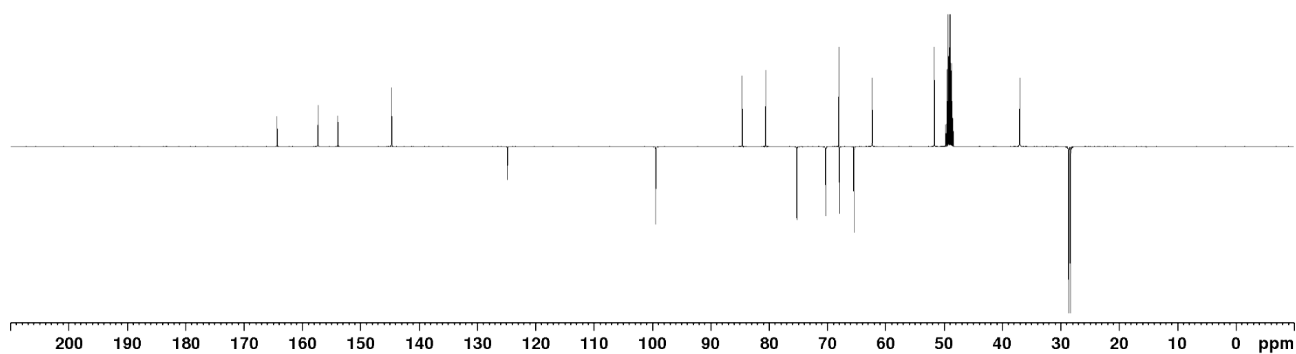

<sup>13</sup>C-NMR spectrum in CD<sub>3</sub>OD (400 MHz)

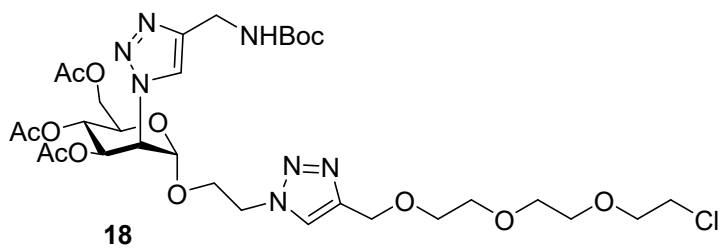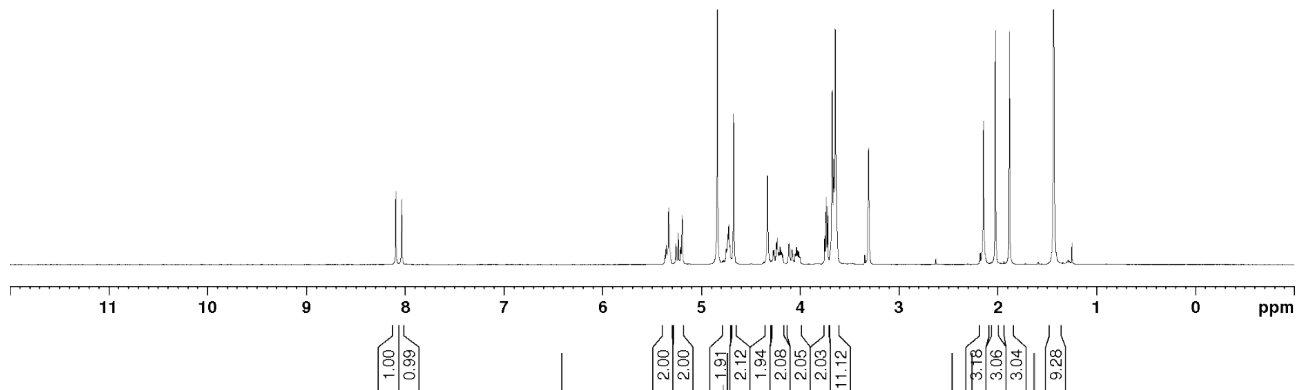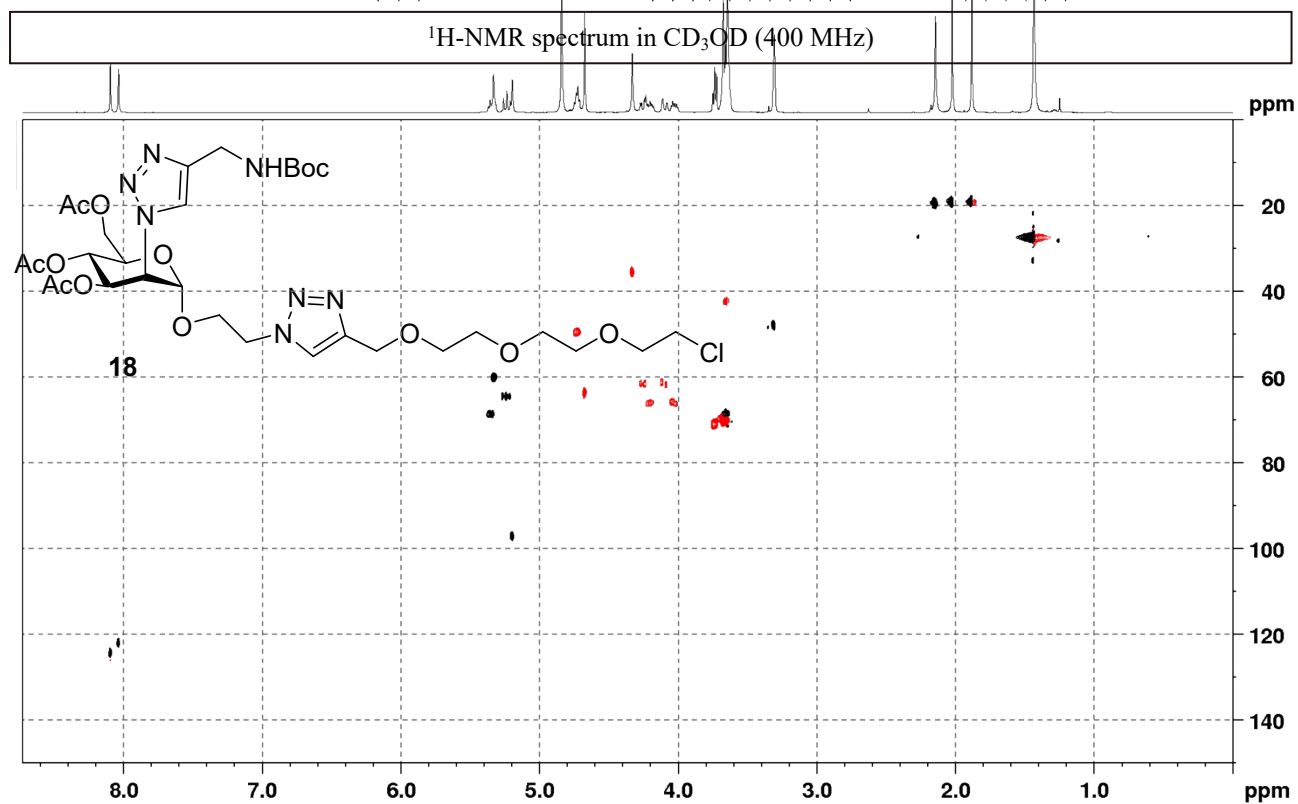

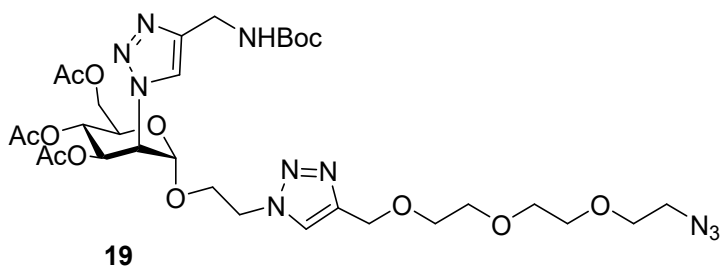

19

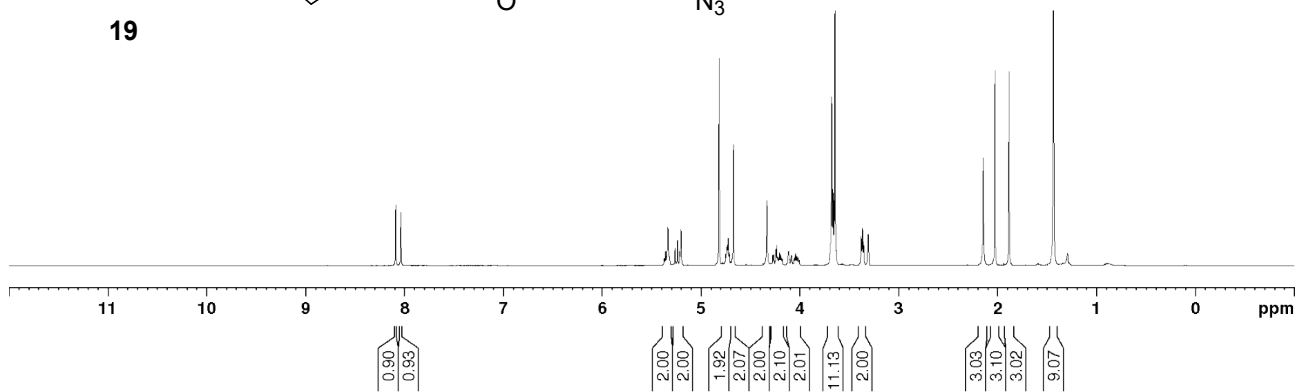

<sup>1</sup>H-NMR spectrum in CD<sub>3</sub>OD (400 MHz)

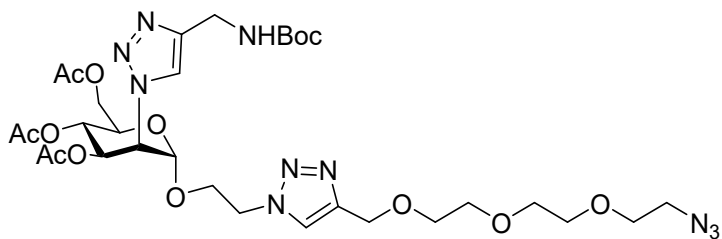

19

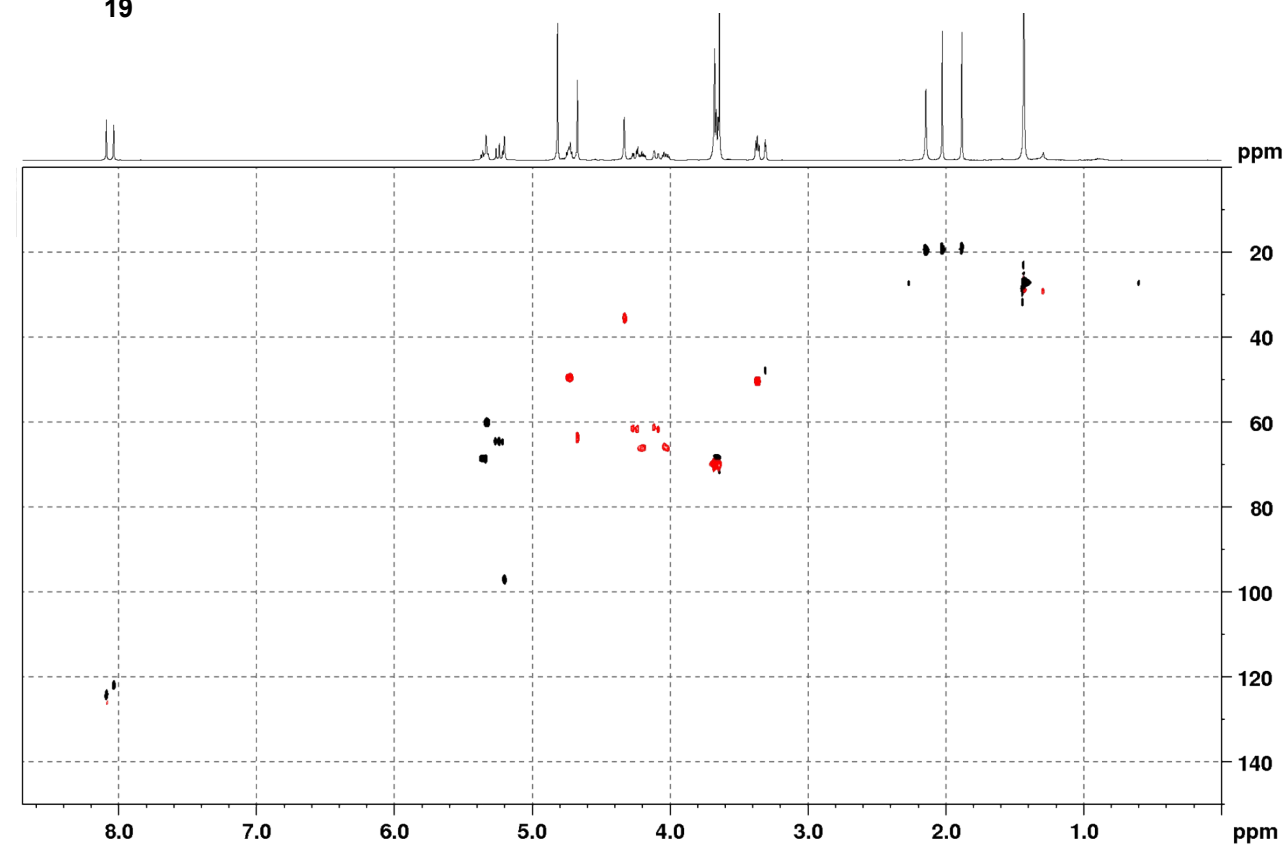

<sup>1</sup>H-<sup>13</sup>C HSQC NMR spectrum in CD<sub>3</sub>OD (400 MHz)

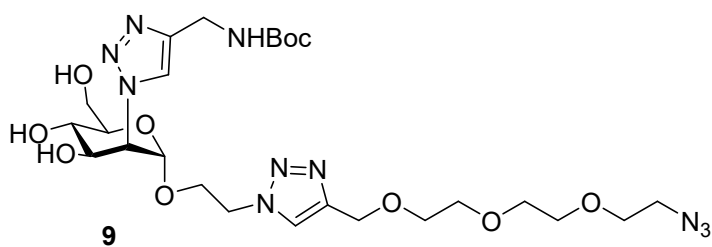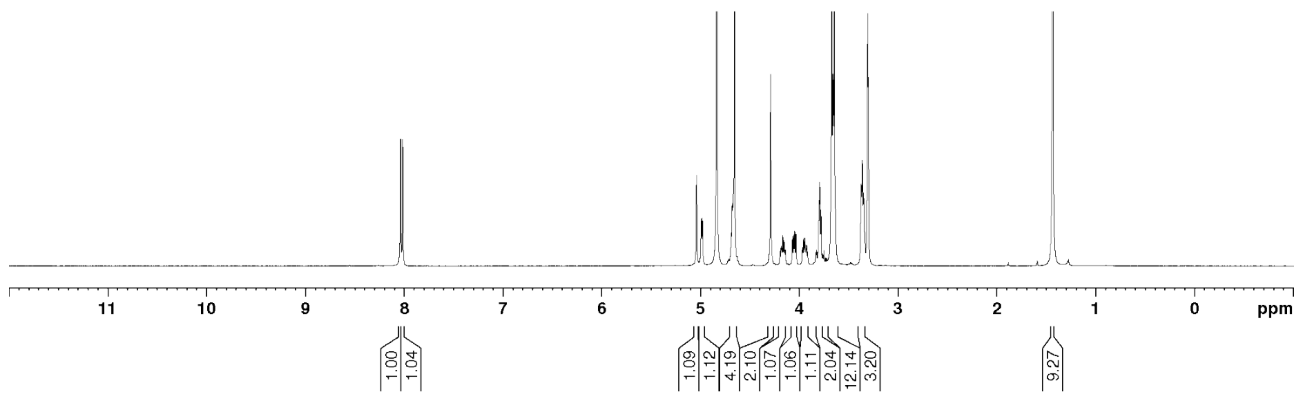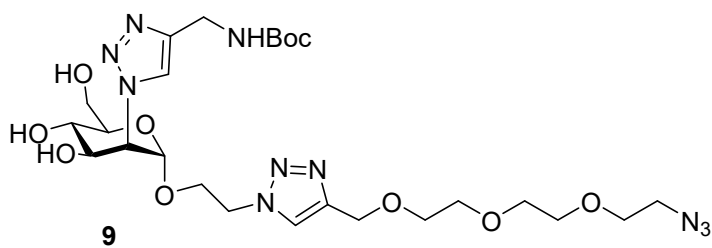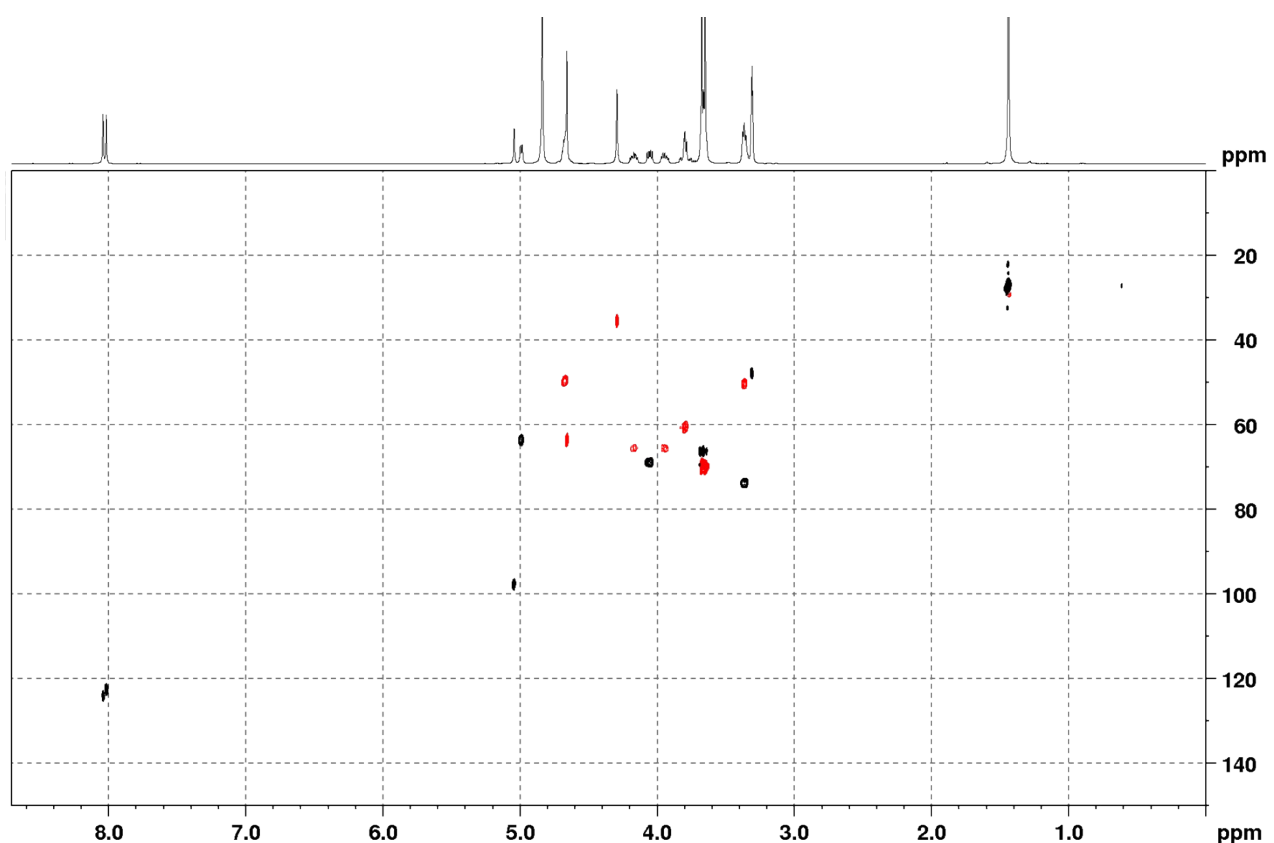



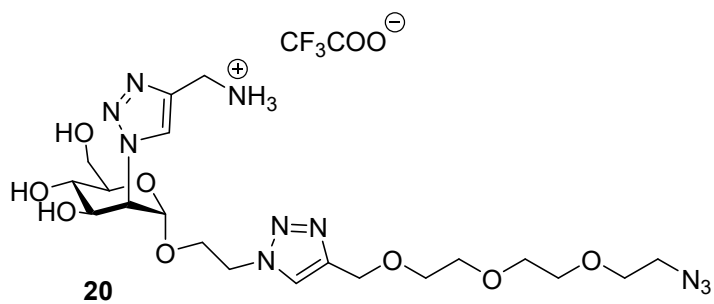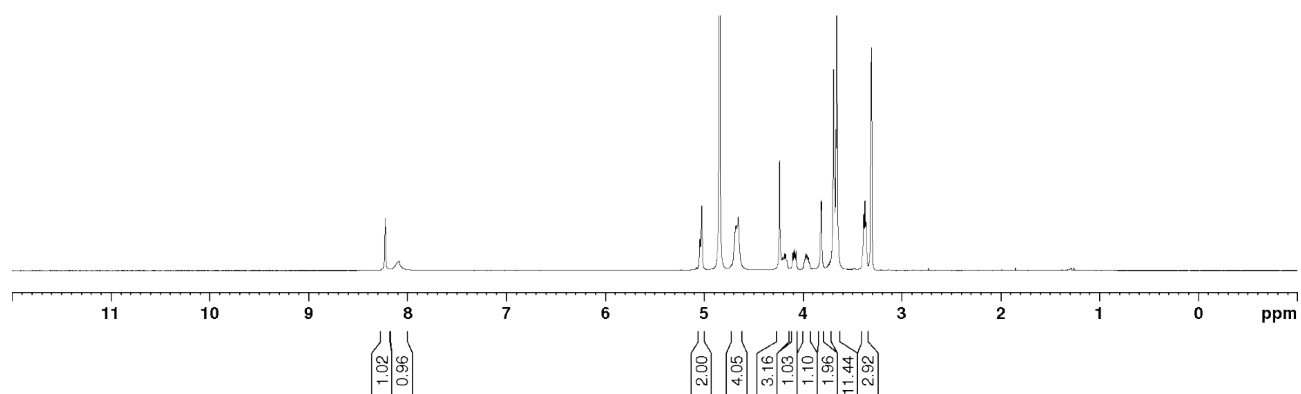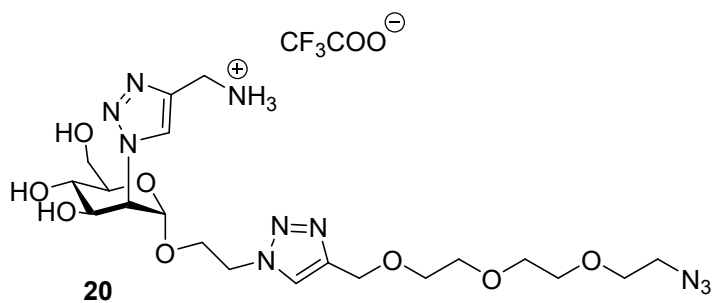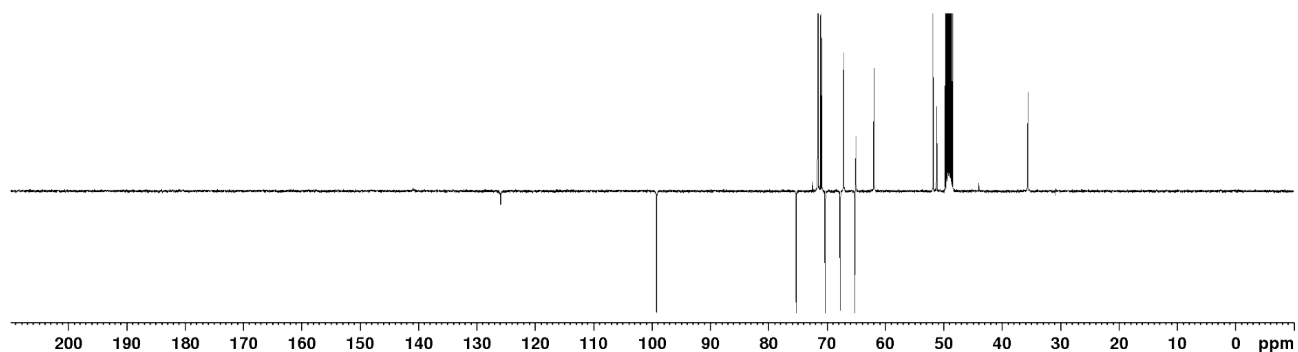

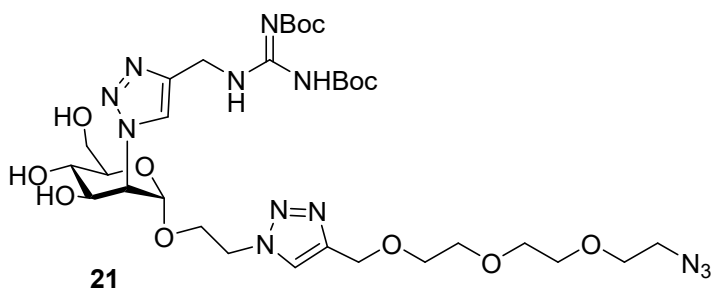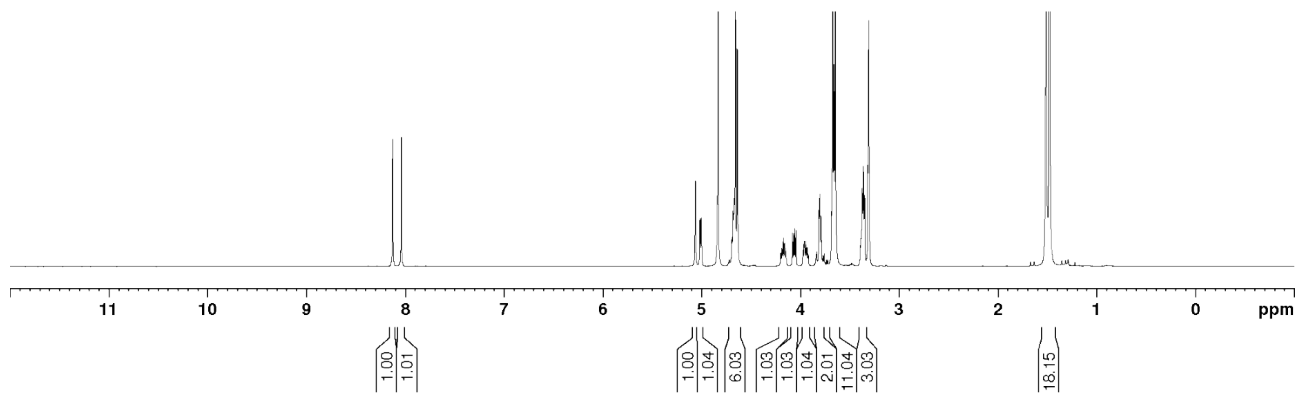

$^1\text{H-NMR}$  spectrum in  $\text{CD}_3\text{OD}$  (400 MHz)

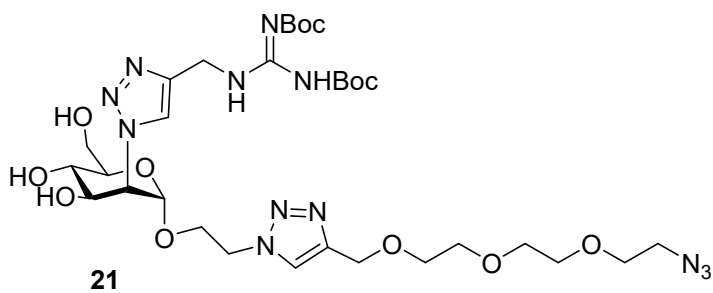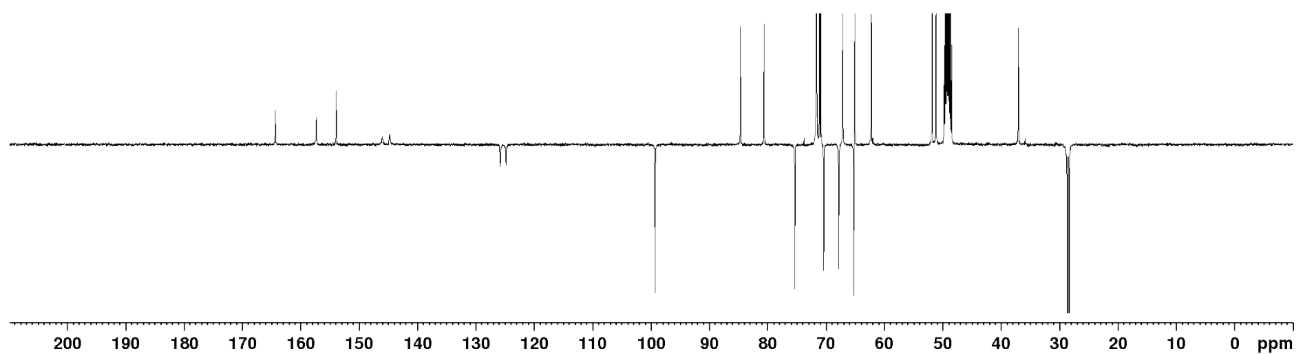

$^{13}\text{C-NMR}$  spectrum in  $\text{CD}_3\text{OD}$  (400 MHz)

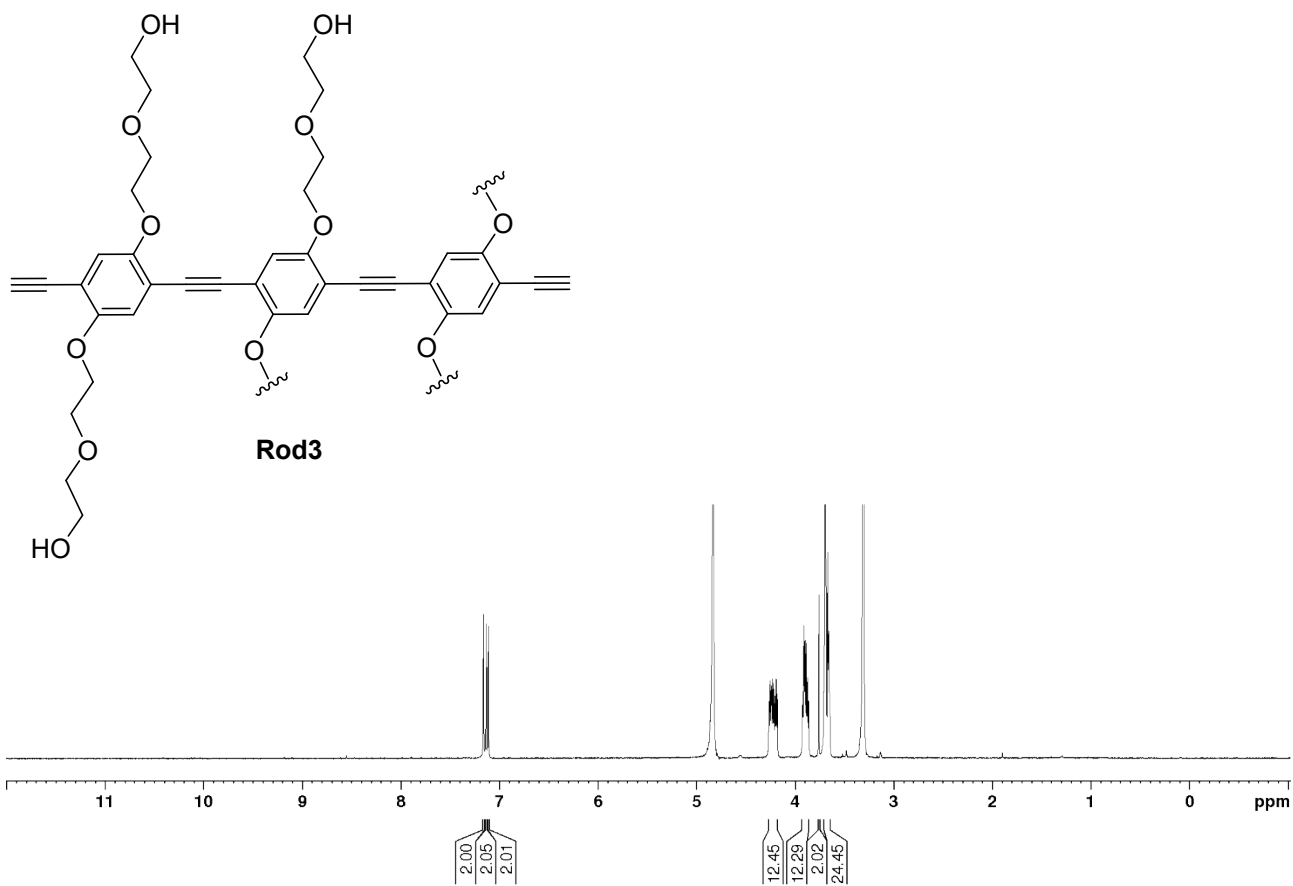

<sup>1</sup>H-NMR spectrum in CD<sub>3</sub>OD (400 MHz)

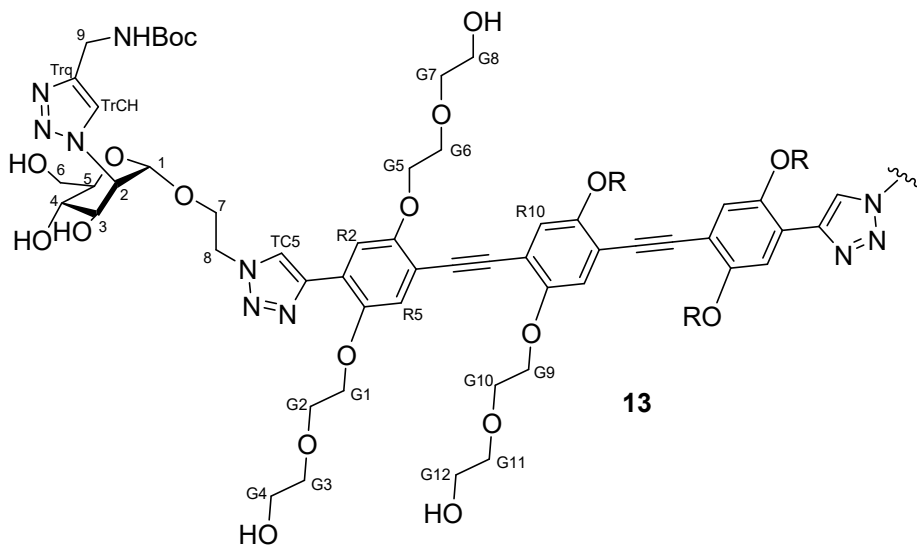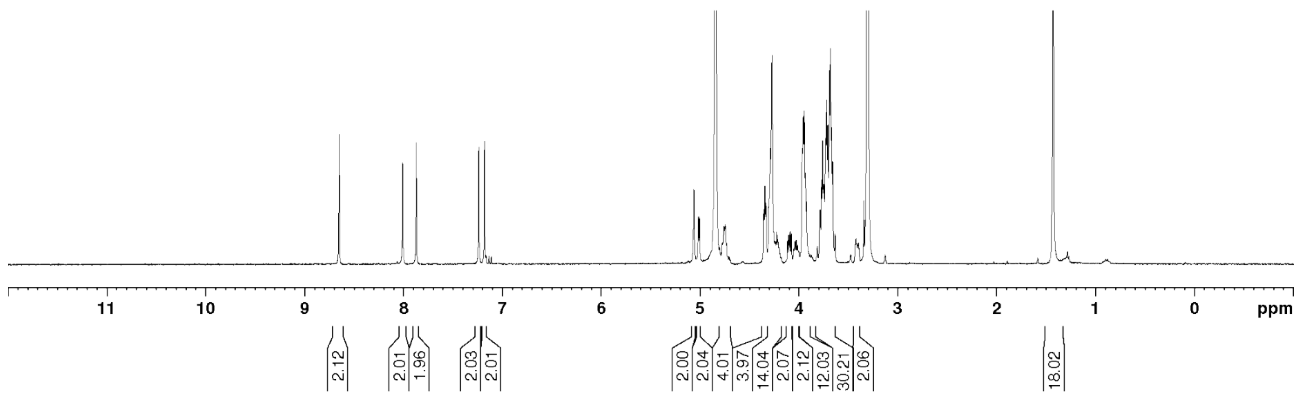

<sup>1</sup>H-NMR spectrum in CD<sub>3</sub>OD (400 MHz)

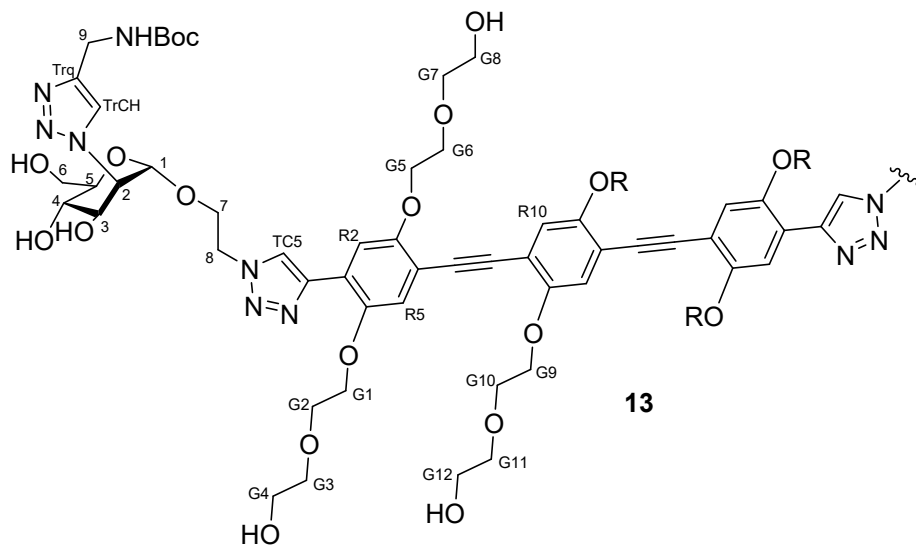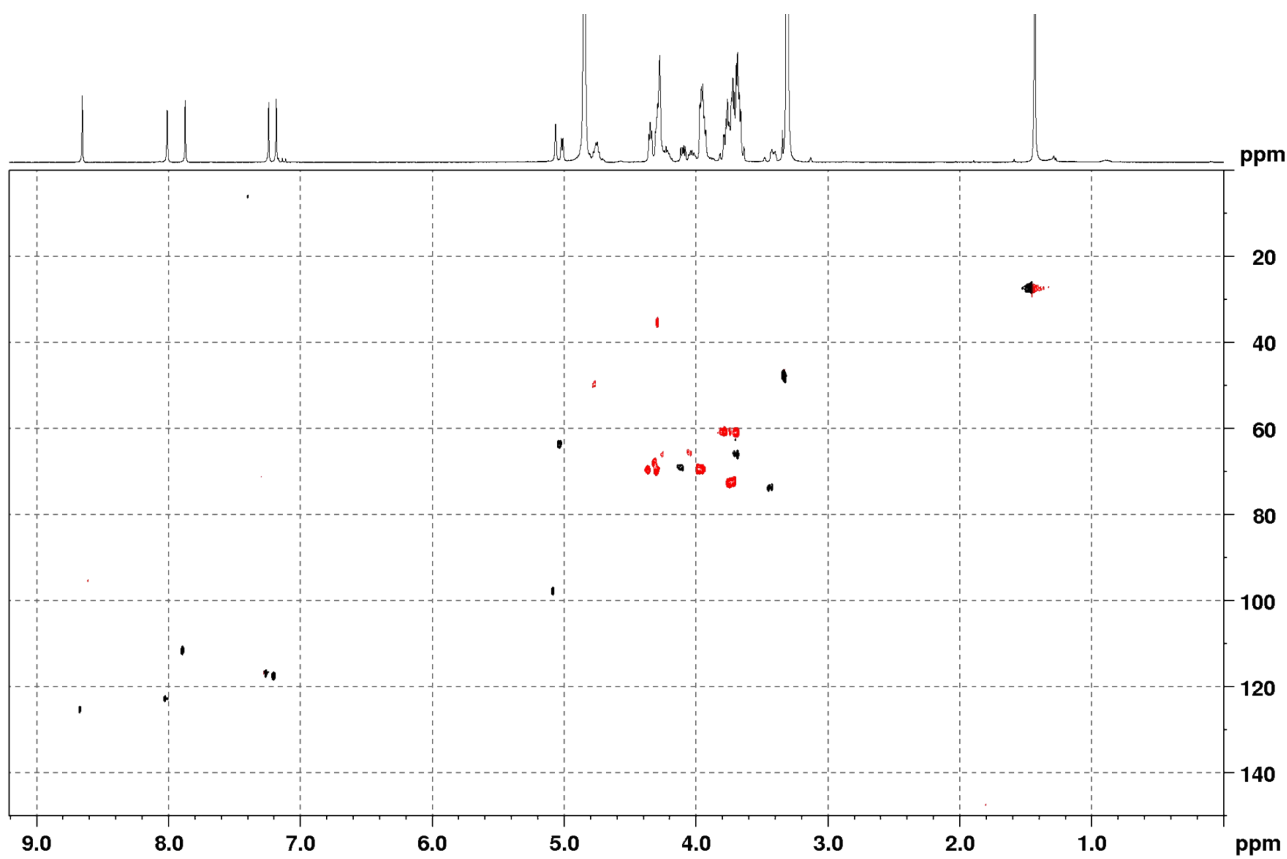

$^1\text{H}$ - $^{13}\text{C}$  HSQC NMR spectrum in  $\text{CD}_3\text{OD}$  (400 MHz)

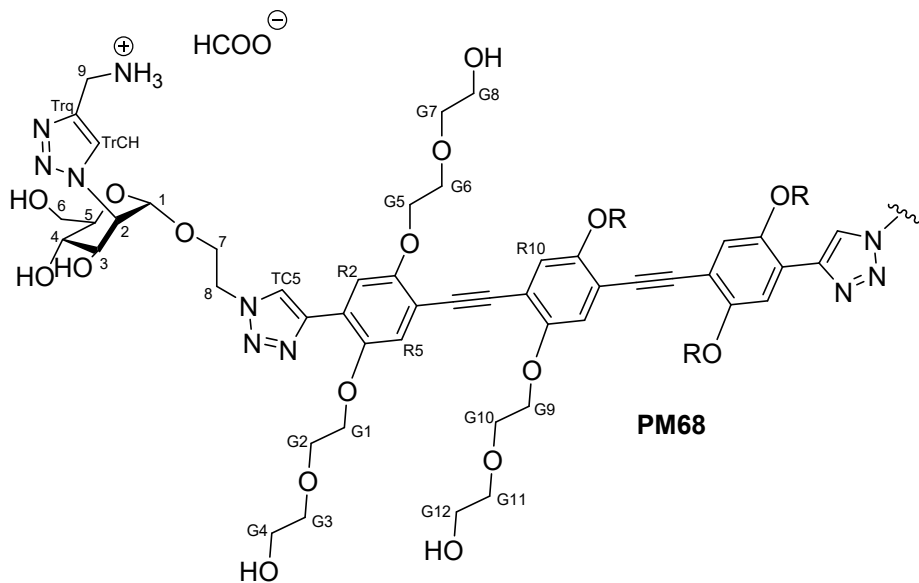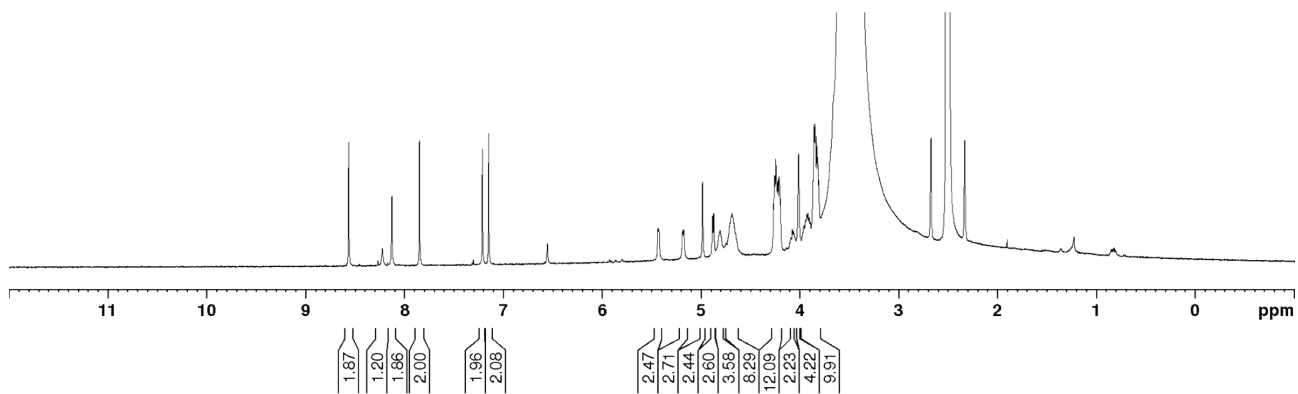

*<sup>1</sup>H-NMR spectrum in DMSO-*d*<sub>6</sub> (400 MHz)*

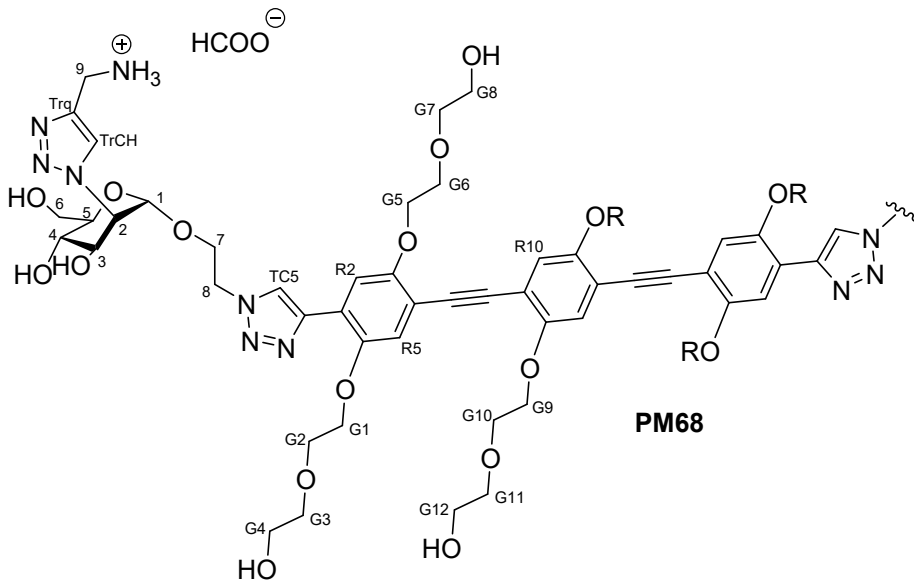

SP267

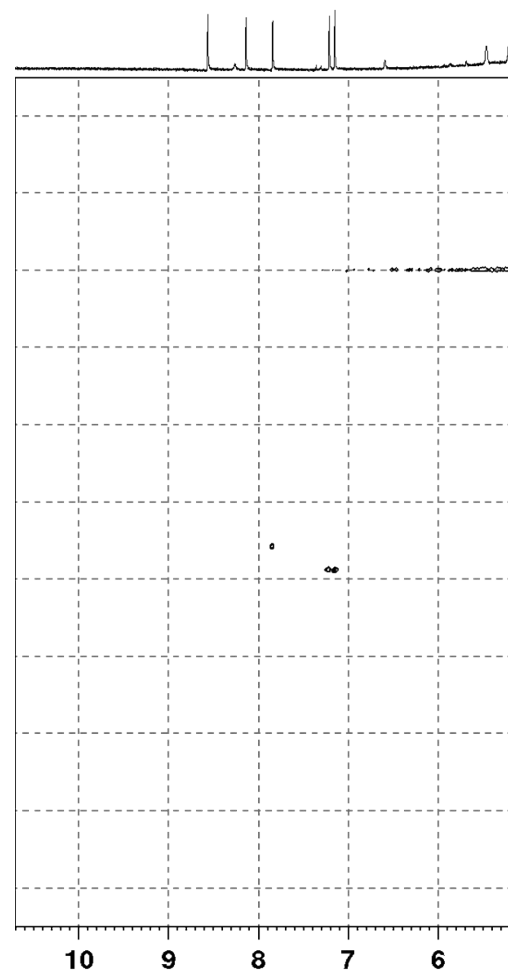

$^1\text{H}$ - $^{13}\text{C}$  HSQC NMR spectrum in  $\text{DMSO-d}_6$  (400 MHz)

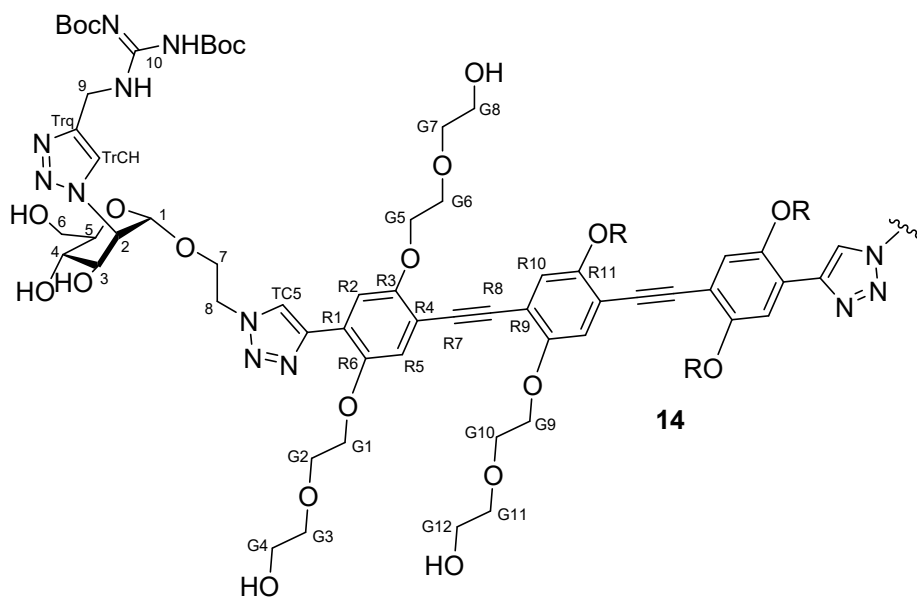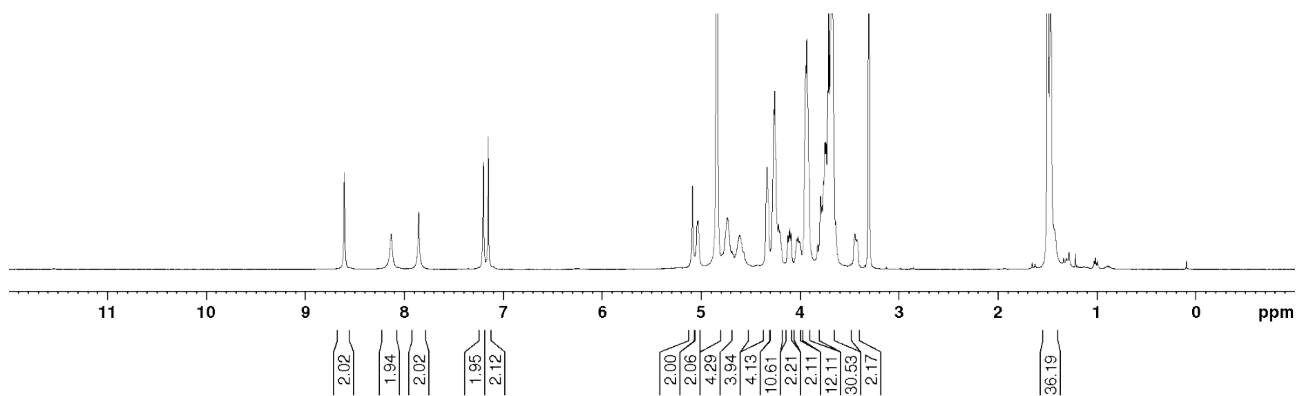

$^1\text{H-NMR}$  spectrum in  $\text{CD}_3\text{OD}$  (400 MHz)



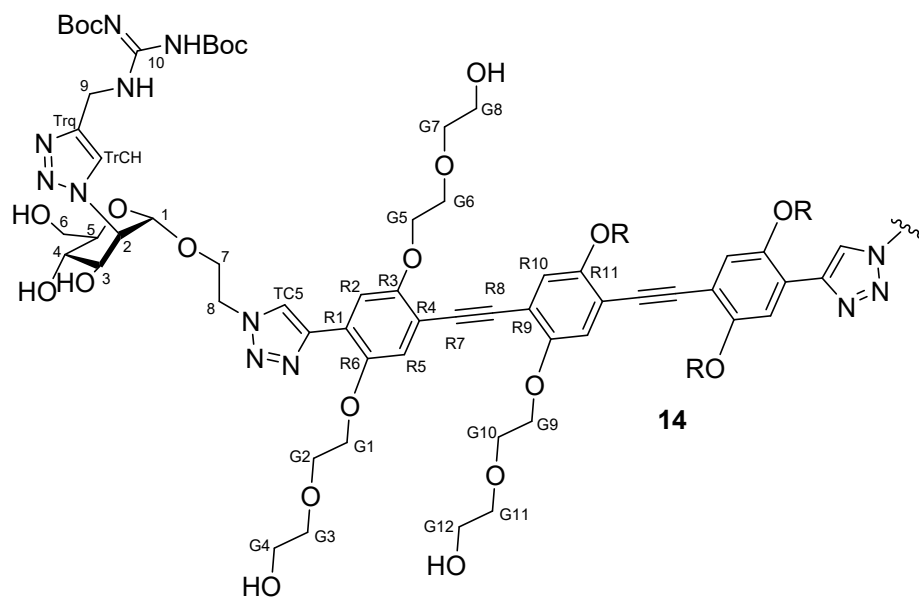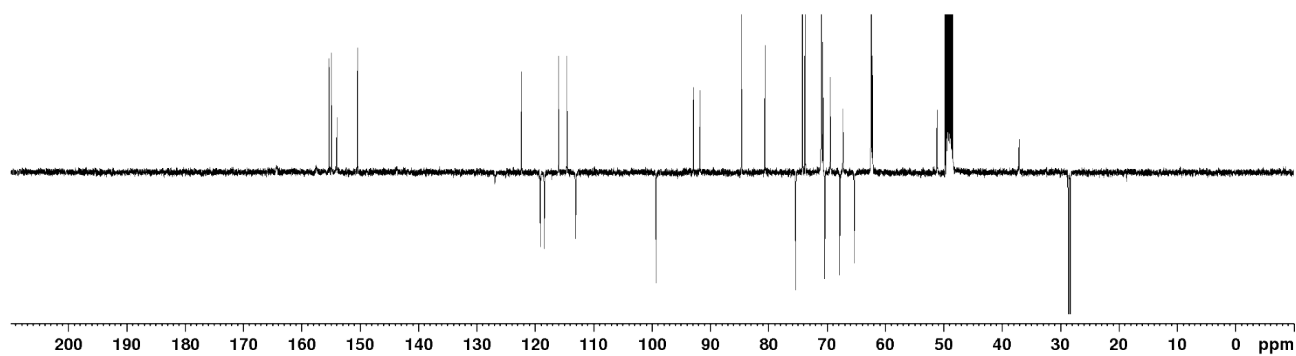

$^{13}\text{C-NMR}$  spectrum in  $\text{CD}_3\text{OD}$  (400 MHz)

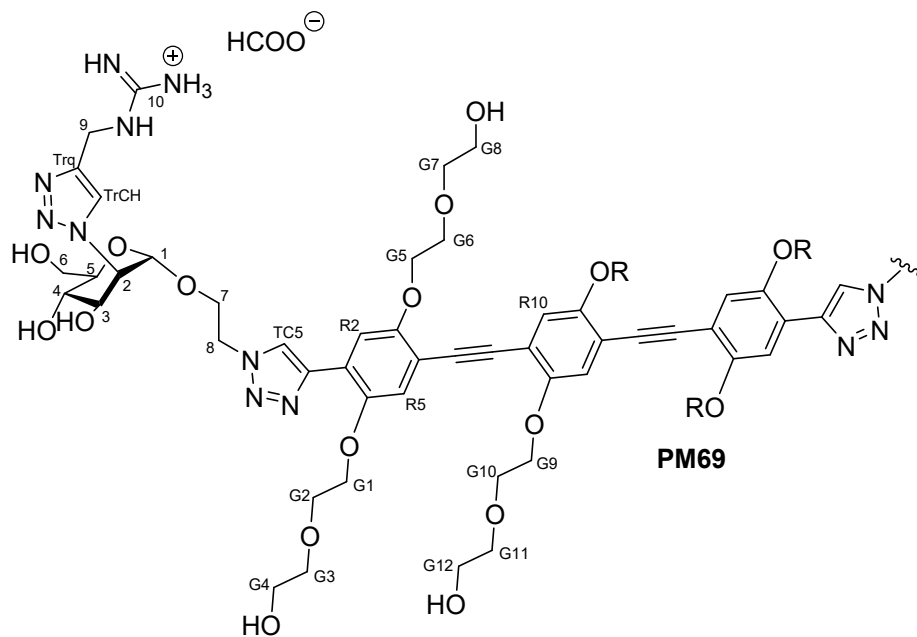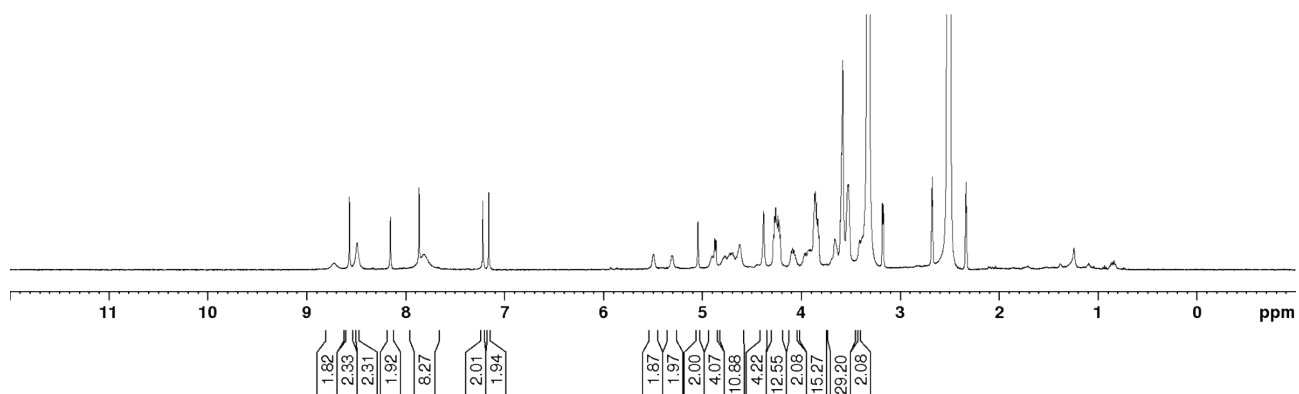

<sup>1</sup>H-NMR spectrum in DMSO-d<sub>6</sub> (400 MHz)

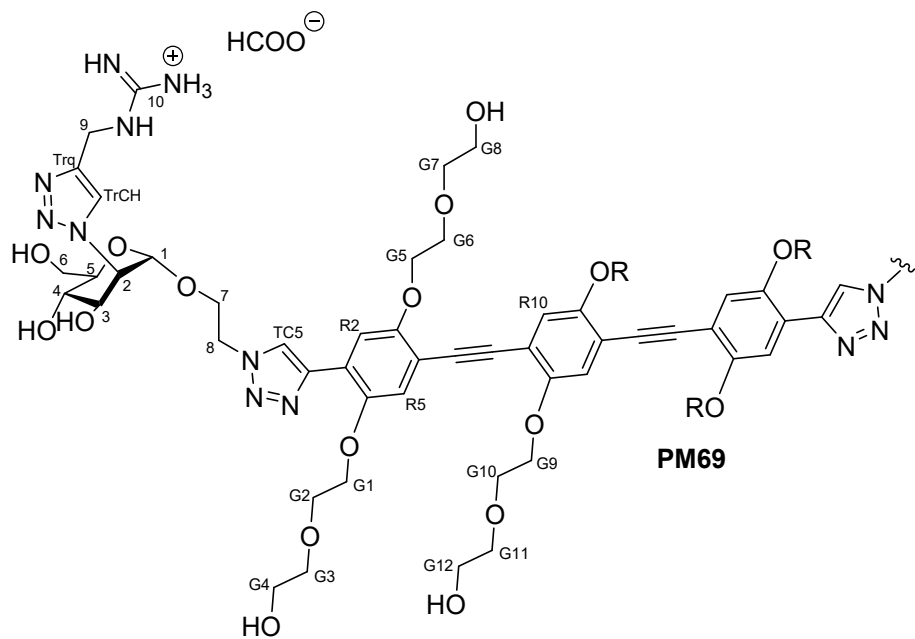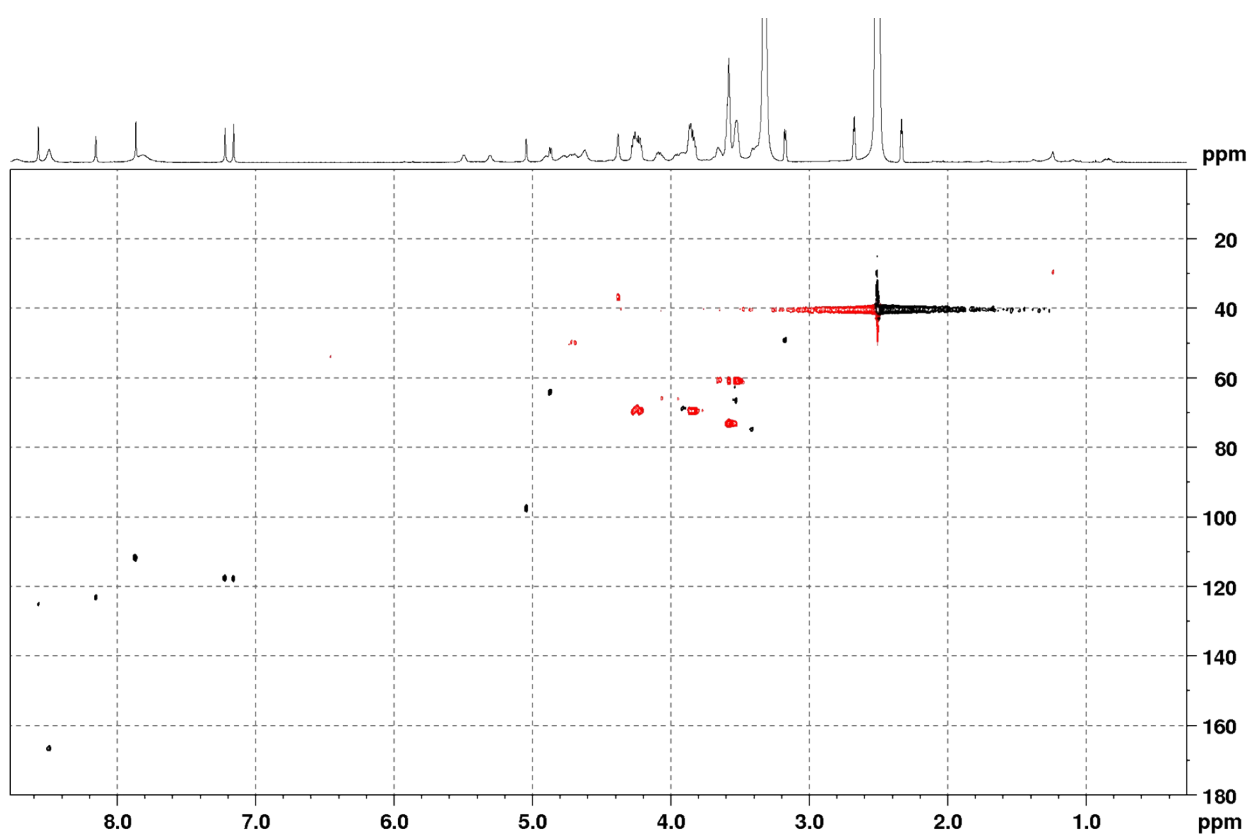

<sup>1</sup>H-<sup>13</sup>C HSQC NMR spectrum in DMSO-d<sub>6</sub> (400 MHz)

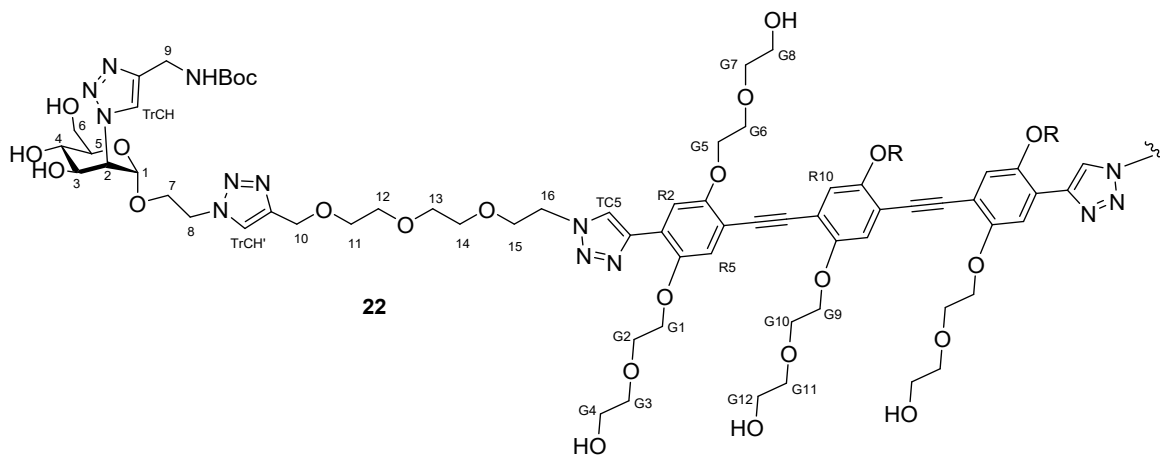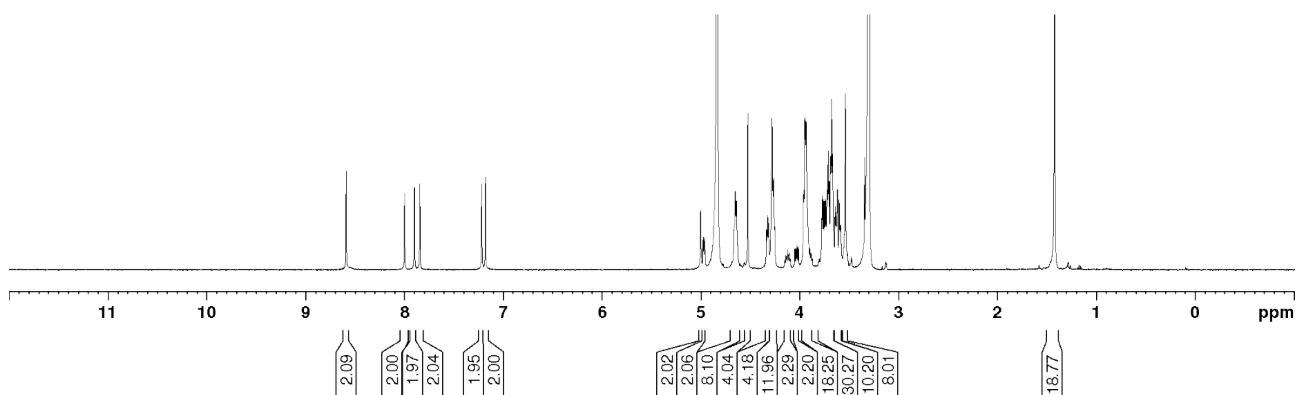

<sup>1</sup>H-NMR spectrum in CD<sub>3</sub>OD (400 MHz)

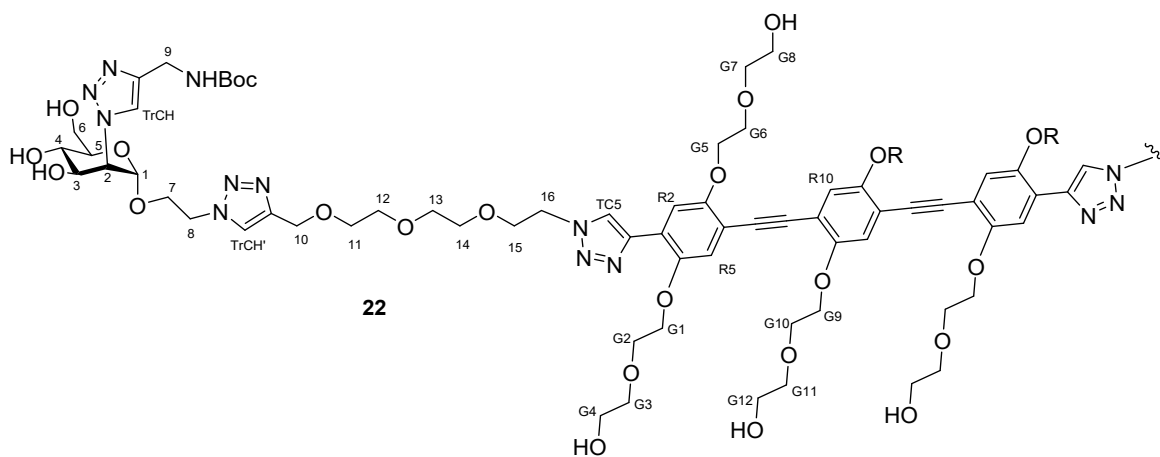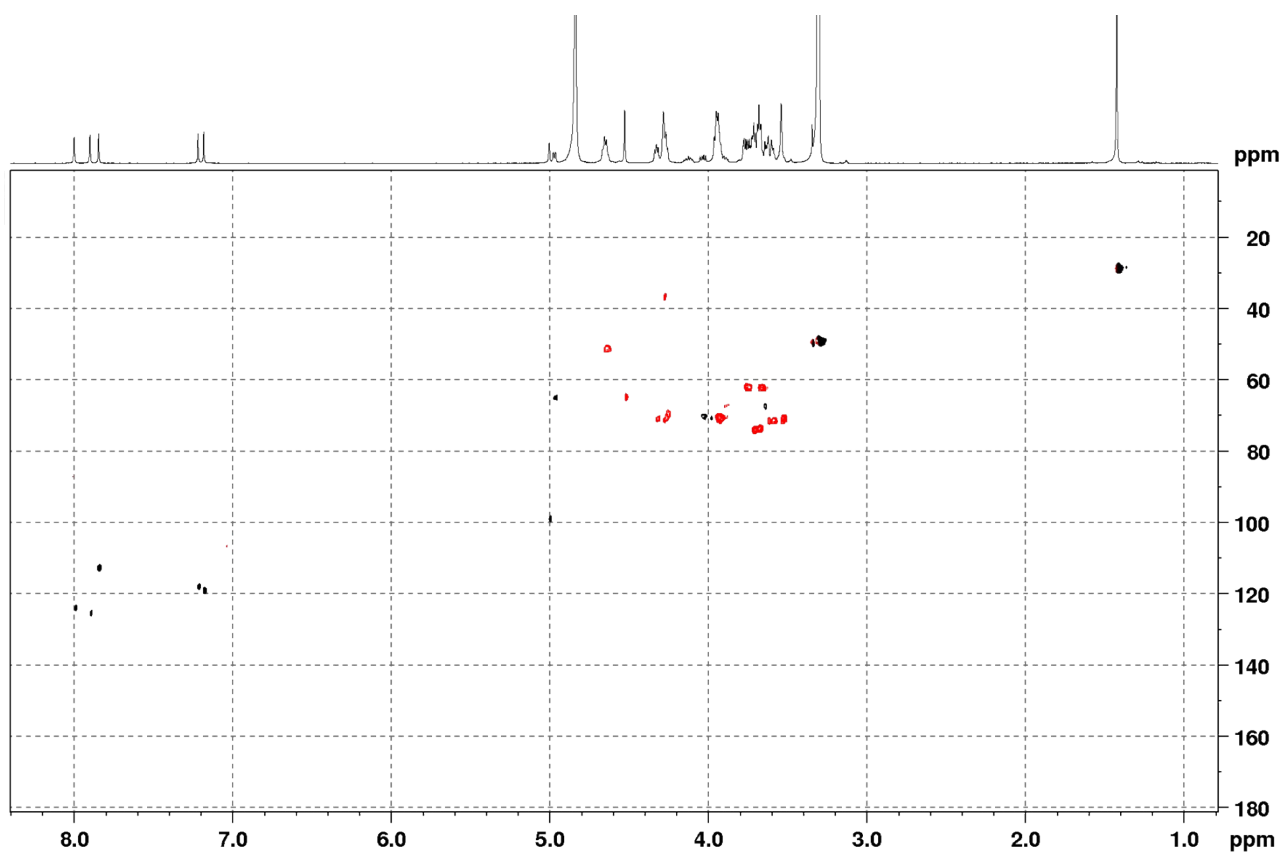

$^1\text{H}$ - $^{13}\text{C}$  HSQC NMR spectrum in  $\text{CD}_3\text{OD}$  (400 MHz)

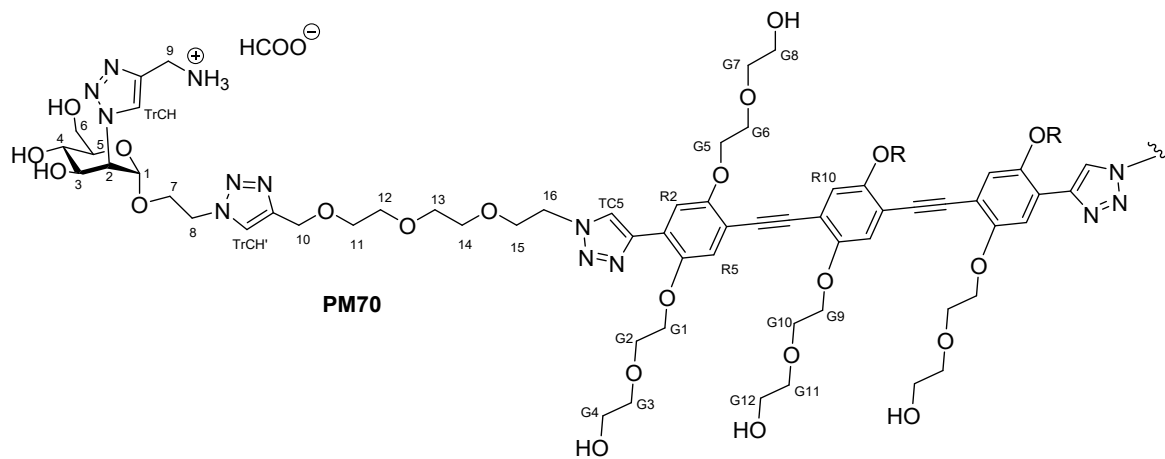

**PM70**

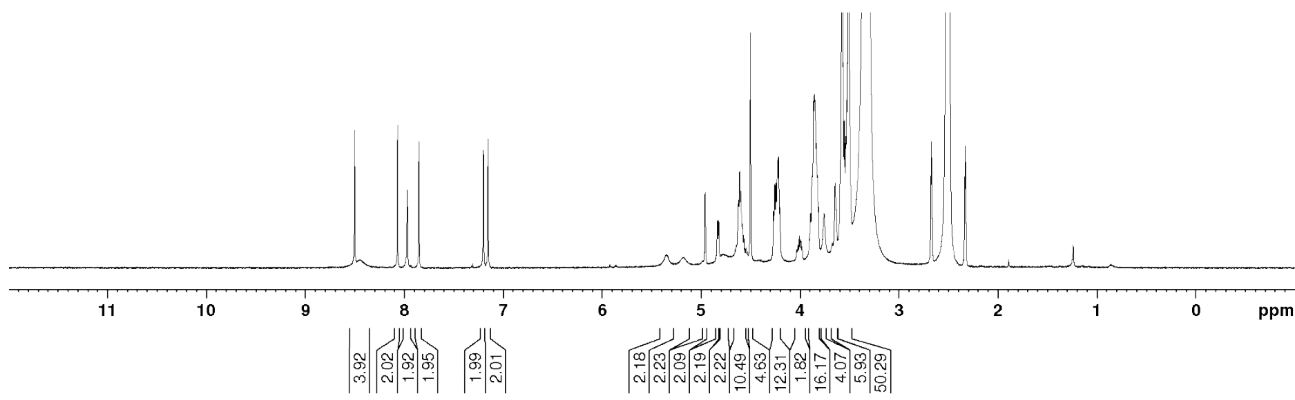

<sup>1</sup>H-NMR spectrum in DMSO-d<sub>6</sub> (400 MHz)

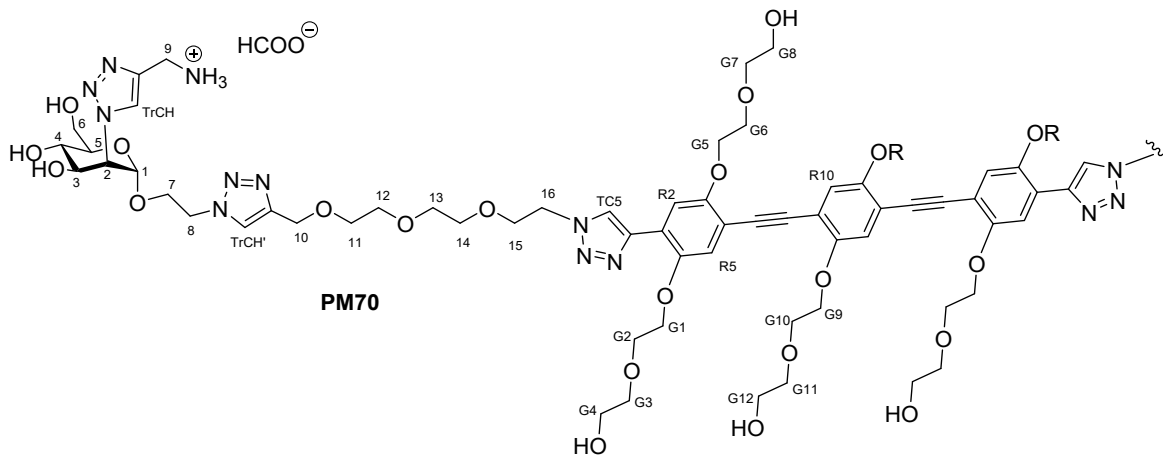

SP2  
86

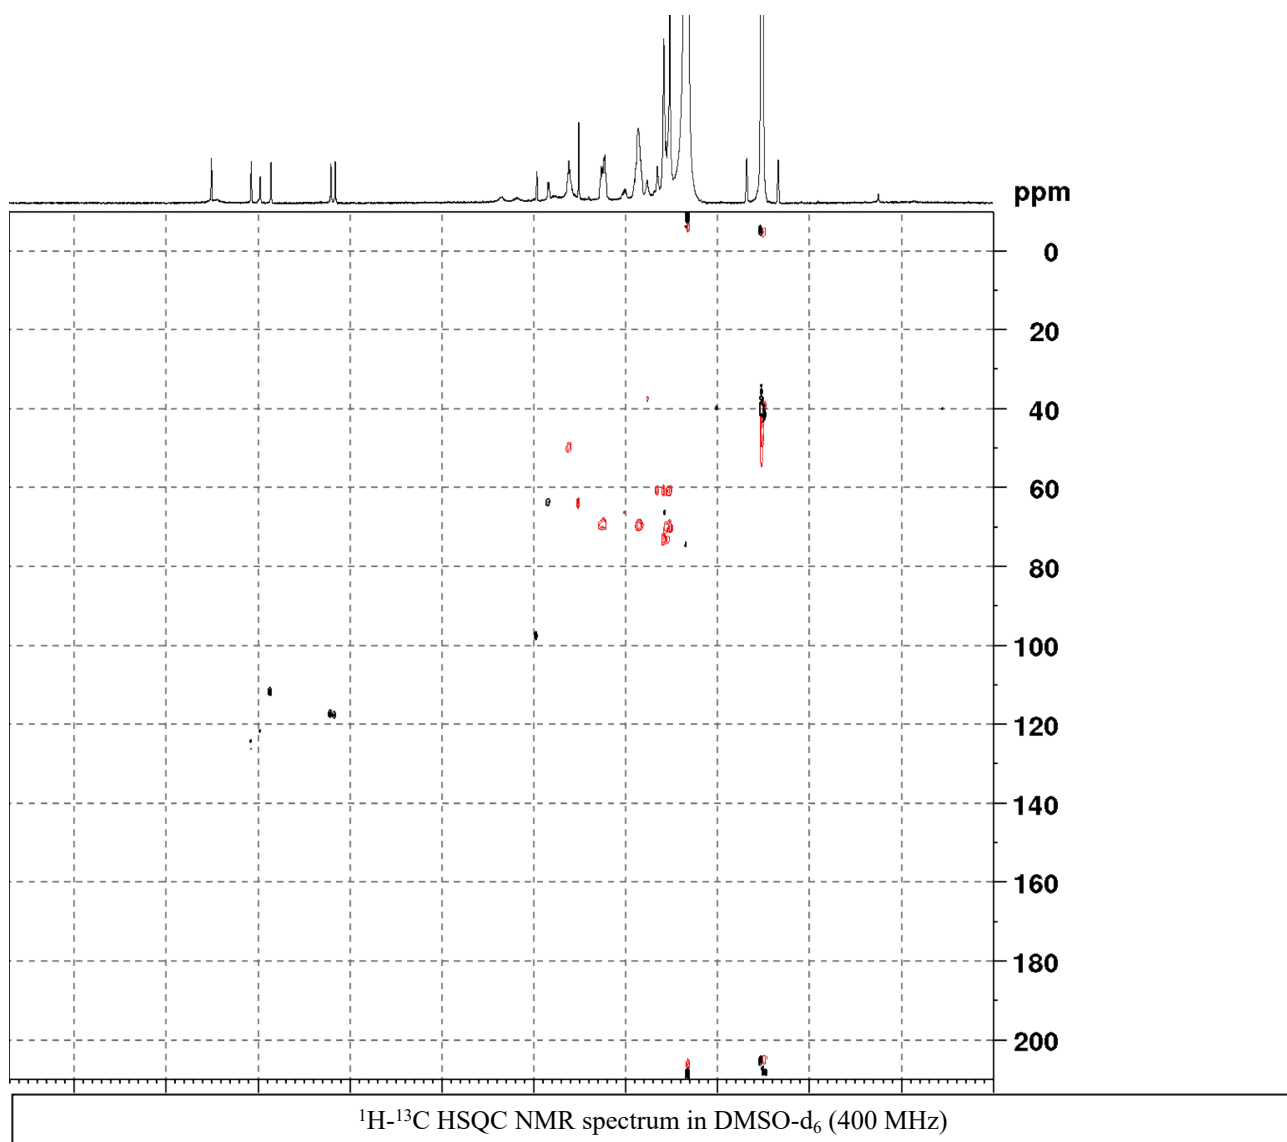

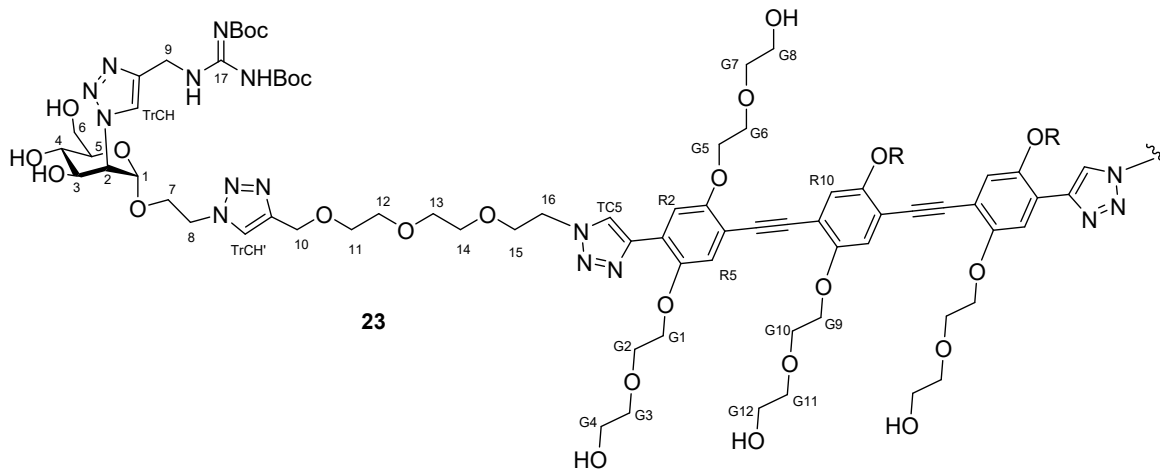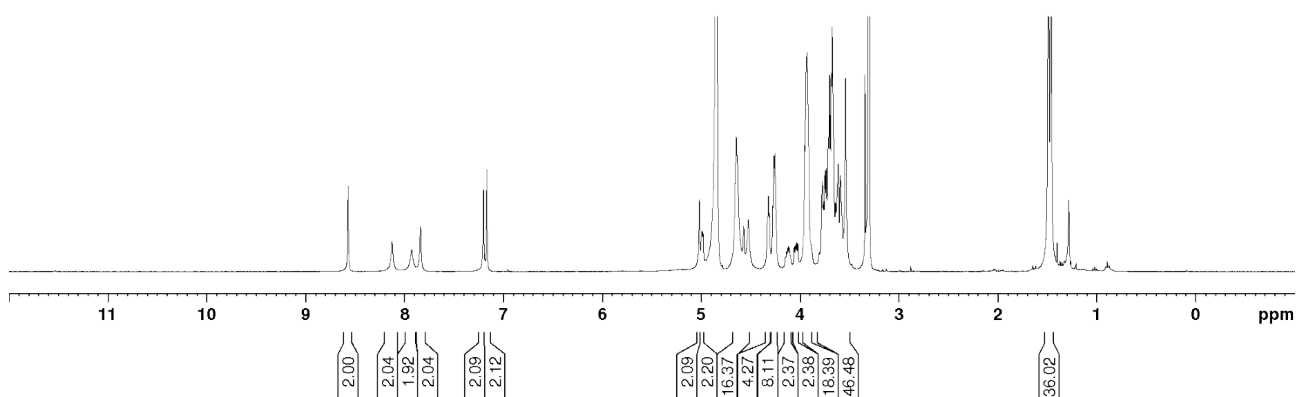

<sup>1</sup>H-NMR spectrum in CD<sub>3</sub>OD (400 MHz)



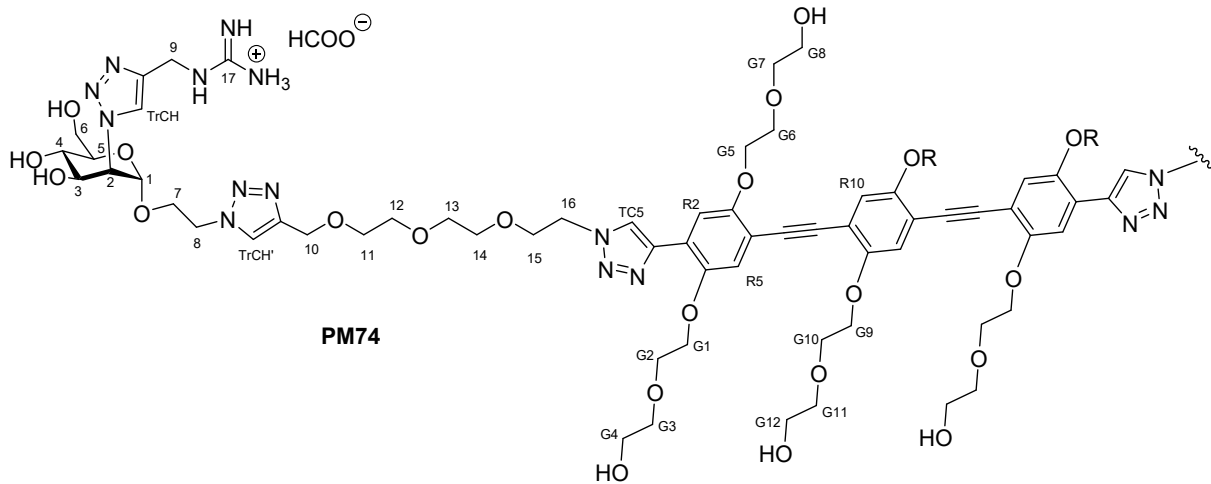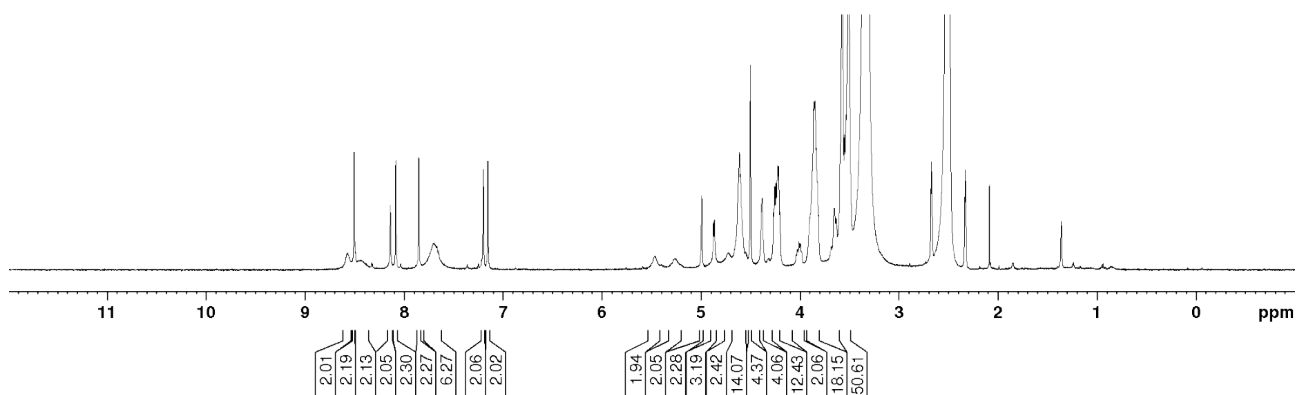

<sup>1</sup>H-NMR spectrum in DMSO-d<sub>6</sub> (400 MHz)

SP3  
07

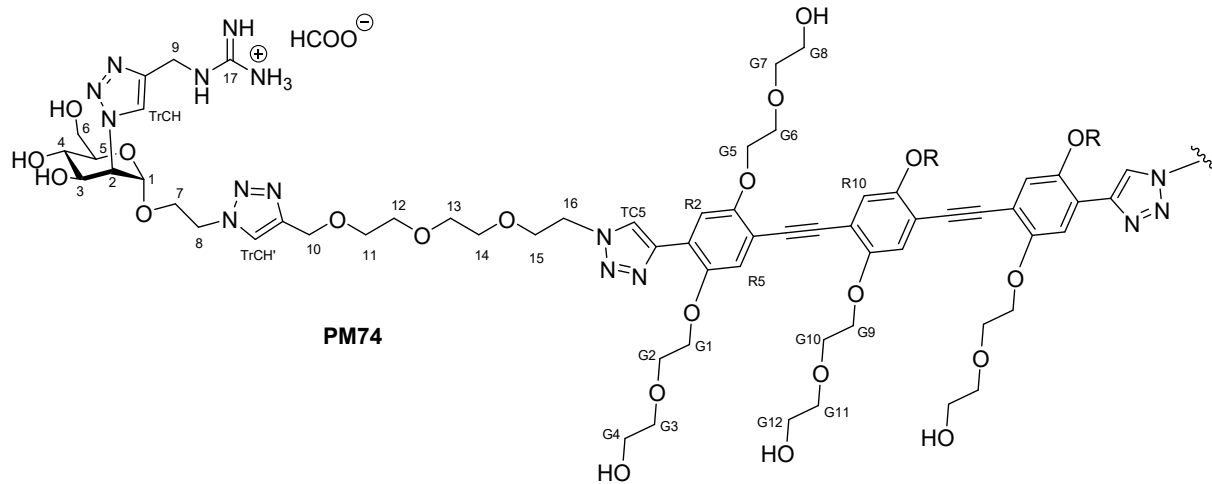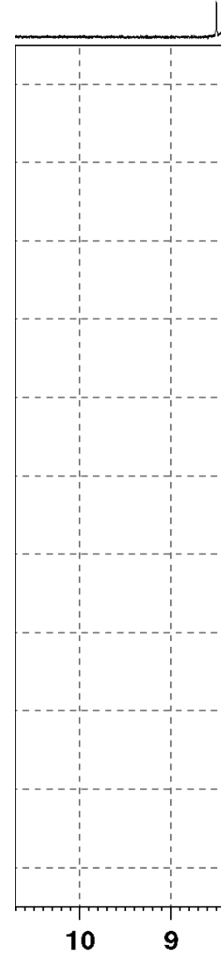

<sup>1</sup>H-<sup>13</sup>C HSQC NMR spectrum in DMSO-d<sub>6</sub> (400 MHz)
